# Supplementary material for: Bioinformatics analysis of neutrophil-associated hub genes and ceRNA network construction in septic cardiomyopathy
Source: publisher site journal article supplement (doi:10.18632/aging.206092), 2024-08-30
Supplement: Supplementary file [file aging-v16-206092-supplementary-material-SD1.pdf]

**SUPPLEMENTARY FIGURE**

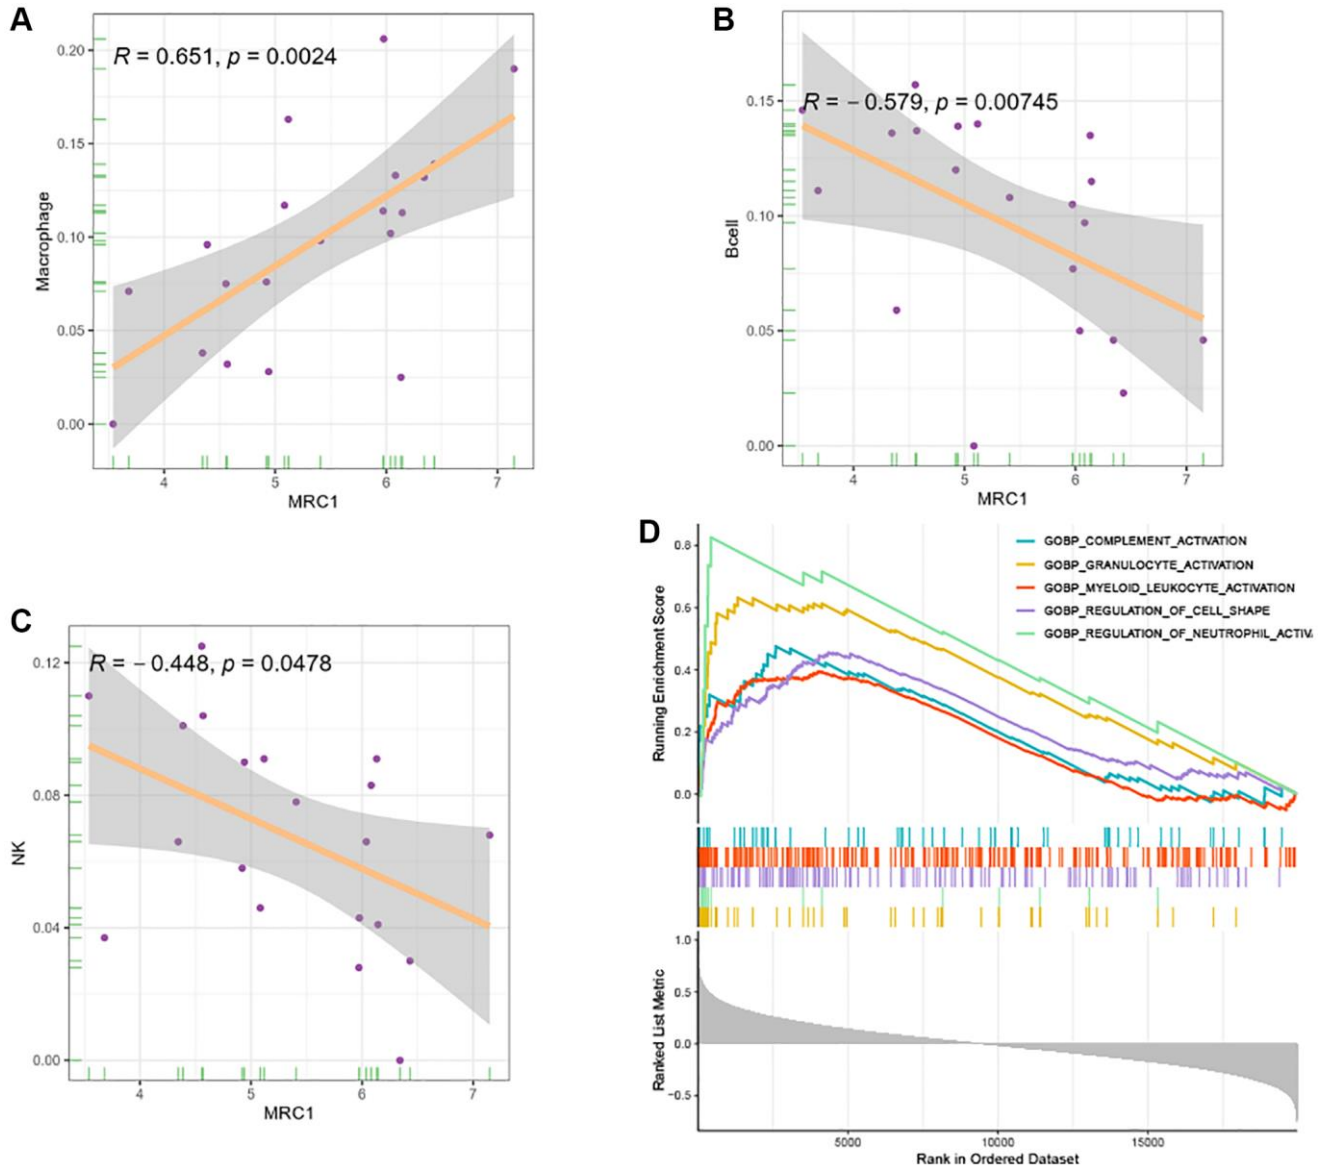

**Supplementary Figure 1. Function of MRC1 in SCM.** (A) Scatterplot of MRC1 correlation with macrophages. (B) Scatterplot of MRC1 correlation with B cells. (C) Scatterplot of MRC1 correlation with NK cells. (D) Top five GO BP associated with MRC1. Abbreviation: GO: Gene Ontology; BP: biological process; GSEA: Gene Set Enrichment Analysis.
