# Supplementary material for: Bioinformatics analysis of neutrophil-associated hub genes and ceRNA network construction in septic cardiomyopathy
Source: Aging (Albany NY). 2024 Aug 30;16(19):12833–49. doi: 10.18632/aging.206092 (PMC11501391; doi:10.18632/aging.206092)
Supplement: Supplementary Table 1 [file aging-16-206092-s002.xlsx]

## Sheet: DEGs of GSE79962
Supplementary Table 1. The DEGs of GSE79962.
id	logFC	AveExpr	t	P.Value	adj.P.Val	B
MIR27B	-3.92118	3.93802	-22.0054	1.01986e-20	2.03717e-16	33.9546
HBA2	6.0605	8.29771	14.7947	9.4784e-16	9.46655e-12	24.7741
C1orf132	-1.58011	3.82042	-13.8919	5.35232e-15	3.17136e-11	23.2722
MIR23B	-1.0904	3.23952	-13.8049	6.35066e-15	3.17136e-11	23.1225
BMP5	-1.17116	3.50623	-12.8298	4.56866e-14	1.82518e-10	21.3794
MIR103A2	-1.20734	3.20209	-11.6307	5.98608e-13	1.99287e-09	19.066
HBB	5.34906	9.60951	11.1453	1.78075e-12	5.0815e-09	18.0733
SNHG21	-1.80791	3.59715	-10.673	5.28943e-12	1.3207e-08	17.0752
JUNB	1.65203	7.15583	10.12	1.96246e-11	4.35557e-08	15.865
MIR30E	-1.42904	2.77295	-9.64555	6.23806e-11	1.24605e-07	14.7907
CEBPD	1.23374	4.46425	9.21452	1.82984e-10	3.04591e-07	13.7857
P2RY14	-1.79124	4.5981	-8.77149	5.67305e-10	8.71686e-07	12.724
FSD2	-2.25028	4.8204	-8.74136	6.13262e-10	8.74994e-07	12.6507
PDP1	-1.06934	7.27456	-8.56027	9.81779e-10	1.3074e-06	12.2076
MIR99A	-1.10393	2.87552	-8.43219	1.37297e-09	1.71407e-06	11.8914
SIK2	1.0528	6.52357	8.27374	2.08497e-09	2.29095e-06	11.497
GPAM	-1.23183	4.20623	-8.00041	4.31832e-09	3.94797e-06	10.8082
OSMR	1.27986	6.80632	7.9253	5.28338e-09	4.13534e-06	10.6171
RPPH1	1.75918	10.1176	7.84614	6.53972e-09	4.83818e-06	10.4149
SMCO1	-2.72947	5.4126	-7.70947	9.46858e-09	6.3045e-06	10.0639
STAT3	1.1851	9.22941	7.69485	9.8522e-09	6.34831e-06	10.0262
ADAMTS9	2.27659	6.90354	7.59743	1.28457e-08	7.77555e-06	9.77423
TCEAL9	1.19065	7.05147	7.47291	1.80603e-08	1.06104e-05	9.45046
HIVEP2	1.30025	6.7128	7.42117	2.0818e-08	1.18812e-05	9.31534
DHRS7C	-2.35875	4.26641	-7.39939	2.21033e-08	1.1976e-05	9.25837
HECW2	-1.09518	4.67316	-7.25662	3.27763e-08	1.59685e-05	8.88346
ASB2	-1.48037	5.12049	-7.17517	4.10776e-08	1.86483e-05	8.66849
CARMN	-1.01545	3.22971	-7.15692	4.32133e-08	1.91819e-05	8.62021
ETS2	1.36567	7.7511	7.12886	4.67183e-08	1.98553e-05	8.54592
RIPK2	1.21226	5.59108	7.10903	4.93677e-08	2.01249e-05	8.49336
SNORD5	1.33337	6.64748	6.95813	7.52195e-08	2.83492e-05	8.09196
TGIF1	1.04219	4.87825	6.87989	9.36573e-08	3.28211e-05	7.88287
MAMDC2	-1.16803	4.35113	-6.83051	1.07589e-07	3.64254e-05	7.75056
SMYD1	-1.71297	7.01534	-6.82295	1.099e-07	3.64803e-05	7.73029
PPP2R3A	-1.07294	6.80389	-6.81233	1.13231e-07	3.64803e-05	7.7018
GADD45B	2.09549	6.7774	6.71325	1.49684e-07	4.39697e-05	7.43541
AIF1L	-1.03455	5.22265	-6.70069	1.55085e-07	4.48959e-05	7.40158
USP2	-1.06818	6.28845	-6.63249	1.88043e-07	5.33948e-05	7.21758
TSPAN12	-1.13882	6.39598	-6.52958	2.51697e-07	6.28456e-05	6.93911
ANGPT2	2.12989	5.47802	6.47358	2.95079e-07	6.78768e-05	6.78719
TMEM2	1.41997	5.04704	6.46313	3.03977e-07	6.78768e-05	6.7588
NT5C1A	-1.00976	3.52481	-6.46003	3.06664e-07	6.78768e-05	6.75039
SNORA61	1.32302	5.4527	6.36504	4.01876e-07	7.9401e-05	6.49199
STC1	1.98491	6.36161	6.36193	4.05452e-07	7.9401e-05	6.48352
CP	1.57567	3.66812	6.34834	4.21475e-07	8.17375e-05	6.44648
SOCS3	1.35075	4.00338	6.33246	4.41005e-07	8.36487e-05	6.40318
HLF	-1.81057	5.12381	-6.29564	4.89864e-07	8.97709e-05	6.30274
SNORA4	1.15731	4.93626	6.18049	6.80864e-07	0.000114949	5.98797
RARRES1	2.16888	5.31605	6.15147	7.39869e-07	0.000119185	5.90849
SLC7A5	1.04325	3.65657	6.13276	7.80622e-07	0.000121179	5.85722
SNORD59B	-1.37736	3.79639	-6.11485	8.21735e-07	0.00012435	5.80814
BHLHE40	1.38901	7.1759	5.98759	1.18415e-06	0.000166573	5.45871
TUBA3E	-1.32662	5.29232	-5.97465	1.22901e-06	0.000171675	5.42314
VIT	-1.31152	4.33823	-5.97117	1.24138e-06	0.000172199	5.41356
SCARNA10	2.63529	6.50786	5.96706	1.25613e-06	0.000173043	5.40227
PLA2G2A	1.75837	10.012	5.94924	1.32218e-06	0.000179663	5.35325
TNFRSF11B	3.1776	5.61608	5.91091	1.47635e-06	0.000192387	5.24776
TMEM182	-1.59851	8.02462	-5.90929	1.48323e-06	0.000192387	5.24331
C10orf10	1.53377	5.86209	5.875	1.63715e-06	0.000202819	5.14887
IFIT1	-1.16095	3.80451	-5.8615	1.70207e-06	0.00020731	5.11167
RRAD	2.36294	6.72425	5.76819	2.22732e-06	0.000248534	4.8544
CYP1B1	1.69026	6.23497	5.76144	2.27112e-06	0.000248631	4.83578
PLIN2	2.00394	8.25451	5.75369	2.32246e-06	0.000248631	4.81439
HIGD1B	-1.13308	6.68768	-5.74158	2.40509e-06	0.000254189	4.78095
LRRC39	-1.38312	7.66939	-5.73164	2.47503e-06	0.000258842	4.75353
MID1	1.82277	5.16744	5.69693	2.73589e-06	0.000273219	4.65768
DIAPH1	1.01702	6.07943	5.68892	2.79984e-06	0.000273866	4.63558
FAM46C	-1.0929	5.18181	-5.6859	2.82435e-06	0.000273866	4.62725
SNORD38B	1.41484	4.132	5.68102	2.86443e-06	0.000276411	4.61377
SNHG3	3.19263	6.45085	5.67829	2.88711e-06	0.00027726	4.60622
SLC2A3	1.38926	5.95933	5.66713	2.98164e-06	0.000283611	4.57541
RNU1-1	2.45512	7.36814	5.64784	3.15247e-06	0.000289305	4.52212
MLLT11	2.06061	7.64329	5.64349	3.19239e-06	0.000289305	4.51008
SGPP2	-1.28878	4.47508	-5.60568	3.56091e-06	0.000299911	4.40559
SNORD3D	2.36033	6.42369	5.58299	3.80213e-06	0.00030873	4.3429
NAMPT	1.1863	9.38238	5.57136	3.93222e-06	0.000316718	4.31073
POR	1.23436	5.38603	5.55423	4.13176e-06	0.000327507	4.26339
CISH	1.39818	4.30637	5.53309	4.39215e-06	0.000342708	4.20494
SNORD21	1.05512	4.28355	5.49296	4.93257e-06	0.00036786	4.09397
THBS1	2.45609	9.06265	5.49276	4.9355e-06	0.00036786	4.0934
FITM2	-1.23419	8.34585	-5.48752	5.01084e-06	0.000370361	4.07891
RNF122	1.49767	5.33662	5.45394	5.522e-06	0.00039003	3.98602
SMAD3	1.11332	6.18601	5.45005	5.5844e-06	0.00039003	3.97528
ZFP36	1.3836	7.91635	5.41591	6.16402e-06	0.000413176	3.88086
SLCO2A1	1.25319	6.47709	5.40505	6.36082e-06	0.000423839	3.85081
NPPA	3.27334	8.91948	5.39638	6.5224e-06	0.000431502	3.82682
PYGM	-1.17902	5.41887	-5.38754	6.69138e-06	0.000436799	3.80237
SNORA23	1.70779	4.27483	5.37883	6.86217e-06	0.000444101	3.77828
PPP1R3A	-1.45243	7.62033	-5.31193	8.32784e-06	0.000512498	3.59322
SNORA80E	1.49252	5.07945	5.29402	8.77089e-06	0.000530905	3.54368
CA14	-1.13689	3.37239	-5.28191	9.08357e-06	0.000544878	3.5102
LSMEM2	-1.03741	4.42094	-5.22677	1.06548e-05	0.000601329	3.35772
SNORA68	1.11623	4.13134	5.22671	1.06568e-05	0.000601329	3.35754
HBD	1.48626	3.41015	5.20215	1.14418e-05	0.00063486	3.28963
SCARNA7	1.65086	5.45597	5.18741	1.19403e-05	0.00065355	3.24889
SNORD6	1.36932	4.4364	5.16935	1.25804e-05	0.00067552	3.19899
NOX4	1.12621	4.10893	5.15638	1.30616e-05	0.000692059	3.16313
HSPA1B	1.30419	7.48359	5.14197	1.36174e-05	0.000713933	3.12332
COQ10A	-1.1935	7.95565	-5.06818	1.68564e-05	0.000819598	2.91952
TGM2	1.04466	9.1611	5.05022	1.7755e-05	0.000842412	2.86993
IL1RAP	1.19715	4.44273	5.04222	1.81705e-05	0.000856027	2.84784
SNORD32A	1.80097	5.08705	5.03888	1.83465e-05	0.000860652	2.83864
G0S2	-1.3807	5.47775	-5.03084	1.87777e-05	0.000872291	2.81646
PIK3R1	-1.02237	8.16567	-5.01976	1.93889e-05	0.00089033	2.78588
PTPN3	-1.06285	5.34287	-5.00666	2.01367e-05	0.000907971	2.74975
SLC25A30	-1.25817	7.40602	-4.95769	2.31968e-05	0.00101169	2.61472
ATP13A3	1.25224	7.66	4.94822	2.38401e-05	0.0010267	2.58861
MS4A4A	-1.03067	4.41299	-4.94644	2.39626e-05	0.00102715	2.58372
C1QTNF1	1.67549	6.24821	4.93701	2.46246e-05	0.00104608	2.55772
RNU4-1	1.81406	4.52758	4.90599	2.69311e-05	0.00111146	2.47228
MID1IP1	1.53506	4.69666	4.88297	2.8781e-05	0.0011685	2.40891
KLHL38	-2.0446	5.51399	-4.88067	2.89725e-05	0.00117389	2.40258
S100A8	1.90117	8.6382	4.86474	3.03345e-05	0.00121429	2.35876
MYC	1.18473	6.61101	4.86244	3.05369e-05	0.0012193	2.35242
NREP	-1.30321	5.89926	-4.84052	3.25294e-05	0.00126909	2.29213
KLHL8	1.04455	5.69561	4.82206	3.43075e-05	0.00130532	2.24138
GRAMD1B	2.01233	6.04403	4.79471	3.71204e-05	0.00137822	2.16625
CHRM2	-1.33632	5.66361	-4.77884	3.88559e-05	0.00141633	2.12269
AQP4	-1.58442	4.35784	-4.76675	4.02331e-05	0.00143776	2.08949
PNP	1.40638	5.8193	4.75711	4.13659e-05	0.00145986	2.06303
KLHL31	-1.23616	7.65593	-4.71685	4.64468e-05	0.00158765	1.95263
MYL7	-1.8936	9.95443	-4.69381	4.96274e-05	0.00165494	1.88953
RNVU1-17	1.74625	6.48243	4.67533	5.23349e-05	0.00171939	1.83893
S100A9	1.59136	7.31471	4.66893	5.33071e-05	0.00173705	1.8214
CYP4B1	-1.35902	5.33692	-4.66339	5.41621e-05	0.00174509	1.80625
S100A12	2.12562	4.34159	4.65387	5.5663e-05	0.00178184	1.78022
SERPINE2	1.80629	6.23817	4.6492	5.64151e-05	0.00179156	1.76744
PTGIS	1.02896	5.52159	4.63311	5.90826e-05	0.00185562	1.72345
SCARNA5	1.20137	5.27832	4.61125	6.2908e-05	0.00194518	1.66372
SNORD33	1.46135	5.42065	4.59528	6.58571e-05	0.00201146	1.62012
MS4A6A	-1.05725	5.98392	-4.53044	7.93025e-05	0.00228911	1.44335
HVCN1	1.01003	4.50397	4.51989	8.17334e-05	0.002339	1.41464
PDK4	1.06426	11.348	4.51304	8.33519e-05	0.00236836	1.39599
TIMP1	1.36368	9.78056	4.49311	8.82409e-05	0.00246311	1.34179
ELL2	1.16845	8.3707	4.48459	9.0416e-05	0.00250494	1.31864
DGKD	1.21119	5.42627	4.44398	0.000101538	0.00270199	1.20837
PI15	1.63341	3.57557	4.4232	0.000107741	0.00282421	1.15203
SNORA75	1.8544	4.11418	4.42125	0.000108341	0.0028326	1.14675
SNORD4B	1.00533	3.94699	4.40458	0.000113616	0.0029379	1.10159
MLF1	-1.03114	6.85624	-4.38533	0.000120023	0.00308554	1.04949
SNORA3A	1.68865	4.04205	4.3612	0.000128561	0.00324244	0.984234
NPPB	3.53174	10.04	4.3536	0.00013137	0.00329248	0.963722
SAT1	1.22514	9.25691	4.31056	0.000148472	0.00362115	0.847581
ADIPOQ	-1.0521	3.08048	-4.28087	0.000161526	0.00384133	0.767644
MT1A	1.24254	7.89949	4.27578	0.000163875	0.00387832	0.753952
DEFA1B	3.62976	6.48099	4.27408	0.000164666	0.00388494	0.749384
EFEMP1	1.02719	7.19698	4.24985	0.000176374	0.00408236	0.684256
VCAN	1.18775	6.83348	4.24065	0.000181033	0.00412094	0.65954
CHI3L1	1.47391	3.85613	4.23092	0.000186091	0.00420494	0.633424
MFAP5	-1.09069	7.38969	-4.22555	0.000188936	0.00423095	0.619041
CCL11	2.01317	6.79898	4.20453	0.000200516	0.00444099	0.562679
MURC	-1.38419	6.34473	-4.1949	0.000206048	0.00451134	0.536894
RAB15	1.15294	4.04361	4.19305	0.000207129	0.00452669	0.531941
SLC5A1	-1.40849	7.57338	-4.19233	0.000207546	0.00453086	0.530034
RNU4ATAC	1.17609	4.52129	4.18303	0.000213076	0.00459137	0.505127
HILPDA	1.62682	4.09754	4.16807	0.000222267	0.00472819	0.465138
FBXO40	-1.67404	7.58566	-4.16443	0.000224564	0.00477199	0.4554
RNU4-2	1.50287	3.78672	4.09939	0.00026972	0.00537436	0.282003
CCL2	1.83882	8.83405	4.0904	0.000276632	0.005471	0.258071
ASB15	-1.54662	6.20721	-4.07764	0.000286727	0.00557681	0.224172
HRH2	1.02657	4.12271	4.05865	0.000302437	0.00578657	0.173744
GPR22	-1.13259	5.88982	-4.05322	0.000307075	0.00584521	0.159356
KCNK1	1.13585	5.12427	4.04258	0.000316378	0.00595072	0.131149
IL1RL1	1.83155	4.97998	4.01672	0.000340152	0.00629706	0.0626947
HAMP	1.43801	4.28074	4.01447	0.000342308	0.00631942	0.0567244
SYNPO2L	-1.03688	7.02977	-4.00221	0.000354251	0.00647408	0.0243344
C10orf71	-1.40083	6.02664	-3.99576	0.000360699	0.00655592	0.00730257
SERPINB1	1.15945	6.36944	3.98908	0.000367499	0.00662427	-0.0103339
BTG2	1.03998	8.19246	3.97281	0.000384595	0.00681754	-0.0532569
MRC1	-1.1706	5.7579	-3.97244	0.00038499	0.00681754	-0.0542275
VSNL1	-1.27882	5.23959	-3.9669	0.000390997	0.00690555	-0.0688407
ASB11	-1.16837	5.85795	-3.9274	0.000436525	0.00749749	-0.172754
SLC6A6	1.98343	6.39982	3.88879	0.000486017	0.00806355	-0.274004
ANKRD2	-1.64709	6.73106	-3.72592	0.000762173	0.011231	-0.697311
IER3	1.14642	5.74008	3.66002	0.000912951	0.0127348	-0.866711
SNORA14B	1.21115	4.11198	3.64558	0.000949673	0.0131097	-0.903685
SERPINE1	2.06598	6.10502	3.62086	0.00101587	0.013683	-0.966827
SERPINA3	1.39934	7.24312	3.608	0.00105205	0.0139819	-0.999612
RNU5E-1	1.32707	4.78426	3.57301	0.00115697	0.0150753	-1.0886
MIR21	-1.01929	3.4502	-3.51329	0.00135982	0.016871	-1.23963
ADAM19	1.25011	5.66367	3.44945	0.00161455	0.0191512	-1.3999
XIRP1	1.13695	9.38375	3.44507	0.0016336	0.0193312	-1.41083
MT1M	1.0009	7.9395	3.40943	0.00179707	0.0205843	-1.49971
NR4A3	1.16068	4.87113	3.38067	0.00194032	0.0216949	-1.57111
FAM180A	-1.06582	3.58328	-3.37101	0.00199085	0.0220332	-1.59503
PTX3	1.6086	4.19757	3.33525	0.00218922	0.0235367	-1.68334
F13A1	-1.07591	6.43768	-3.31547	0.00230691	0.0243812	-1.73199
HEY2	-1.12206	6.52982	-3.31058	0.00233696	0.0246103	-1.744
NEB	1.23146	3.65429	3.23715	0.00283541	0.0281966	-1.92328
TFPI2	1.19241	3.38109	3.2068	0.00306986	0.0298833	-1.99682
GRAMD4	1.02656	4.18773	3.20264	0.0031034	0.0300487	-2.00687
SLN	1.63218	4.30936	3.19976	0.00312682	0.0302168	-2.01383
PPM1K	-1.10985	6.03902	-3.19912	0.00313204	0.0302234	-2.01537
FABP4	-1.07039	8.18851	-3.19244	0.00318709	0.0305628	-2.03148
FCN3	1.04858	5.64899	3.14511	0.00360467	0.0332272	-2.14522
TXLNB	-1.0122	8.26751	-3.09078	0.00414815	0.0362941	-2.2747
PPBP	1.07615	3.61909	3.08786	0.00417946	0.0364085	-2.28163
IL1R2	1.22291	4.96937	3.04543	0.00466057	0.0391484	-2.38187
C3orf52	1.11868	4.84417	3.03161	0.00482828	0.0400021	-2.41436
GUCA1C	-1.11255	3.62277	-2.98496	0.00543772	0.0433607	-2.52346
CORIN	-1.27334	6.05076	-2.90628	0.00663339	0.0497379	-2.70536

## Sheet: DEGs of GSE44363
id	logFC	AveExpr	t	P.Value	adj.P.Val	B
Saa3	9.06841	9.22022	53.783	2.16588e-12	2.86924e-08	16.2608
Serpina3n	6.96256	9.61548	52.3244	2.75703e-12	2.86924e-08	16.1616
Fpr2	4.50181	6.44908	40.3532	2.69033e-11	1.86655e-07	15.0497
Lcn2	9.30681	9.13874	35.115	9.08547e-11	4.72762e-07	14.3224
Serpina3g	6.31553	7.29905	32.7242	1.68287e-10	7.00543e-07	13.919
Lrg1	4.5218	10.8955	29.0547	4.75242e-10	1.64861e-06	13.1883
S100a8	4.81693	6.37709	27.3914	7.94409e-10	2.21599e-06	12.8038
Psmb10	2.92619	10.14	27.1731	8.51732e-10	2.21599e-06	12.7506
Irg1	3.36287	5.64215	26.2222	1.16137e-09	2.68587e-06	12.5104
Cd14	2.25002	7.23232	25.6099	1.42637e-09	2.96884e-06	12.3485
6030422H21Rik	2.51352	4.97744	24.9253	1.80522e-09	3.41581e-06	12.1602
Ifitm3	2.06556	11.7058	23.2524	3.30002e-09	5.40694e-06	11.6655
Plac8	4.27075	6.17379	23.0475	3.56333e-09	5.40694e-06	11.6013
S100a9	4.83631	6.36054	22.9933	3.63684e-09	5.40694e-06	11.5841
Oasl2	3.98927	7.59754	21.9254	5.4915e-09	7.62001e-06	11.2345
Timp1	4.30312	7.48985	21.1266	7.57132e-09	9.84934e-06	10.9567
Gpc6	-1.38989	5.54403	-20.9233	8.23152e-09	1.00783e-05	10.8837
Itgam	2.46315	4.69258	20.4556	1.00072e-08	1.15717e-05	10.712
Ifi35	2.47499	9.0361	19.9888	1.22145e-08	1.32881e-05	10.5351
Slfn4	3.5479	5.68871	19.7913	1.33075e-08	1.32881e-05	10.4586
Bst2	3.56344	8.10635	19.7742	1.34068e-08	1.32881e-05	10.4519
Cfb	3.87847	6.72183	19.5039	1.50966e-08	1.42827e-05	10.3454
Irf7	4.8596	7.45631	19.2714	1.67408e-08	1.49982e-05	10.2522
C1ra	2.56627	8.11102	19.1988	1.7294e-08	1.49982e-05	10.2228
Lgals3bp	3.09291	8.41341	19.0467	1.85204e-08	1.54193e-05	10.1608
Icam1	3.17408	8.2227	18.7181	2.15146e-08	1.72232e-05	10.0244
Ly6a	1.92996	11.8969	18.6358	2.23451e-08	1.72256e-05	9.9898
Csf2rb	2.25541	5.3815	18.3767	2.52061e-08	1.87371e-05	9.87941
Prkaa2	-1.21445	8.47154	-18.2284	2.70237e-08	1.93956e-05	9.81537
Susd2	1.49027	5.44832	18.1091	2.85928e-08	1.9495e-05	9.76334
Cnksr1	1.95007	7.32913	18.0768	2.90355e-08	1.9495e-05	9.74915
Ifitm2	1.35084	10.7028	17.855	3.22833e-08	2.09983e-05	9.65105
Fblim1	-1.91615	9.53401	-17.7031	3.47414e-08	2.19124e-05	9.58292
H2-K1	1.91012	9.24564	17.5574	3.72936e-08	2.22544e-05	9.51694
1500012F01Rik	1.41059	7.94053	17.5277	3.78398e-08	2.22544e-05	9.50338
Nnat	-1.01193	4.57664	-17.4812	3.87125e-08	2.22544e-05	9.48211
Psmb9	3.50059	8.24071	17.4371	3.95605e-08	2.22544e-05	9.46188
Slc15a3	3.34396	5.55991	17.0593	4.77328e-08	2.55327e-05	9.28593
Uba7	2.03569	7.69082	17.0297	4.84471e-08	2.55327e-05	9.27196
Mpped2	-1.2297	6.51772	-16.8601	5.27841e-08	2.55327e-05	9.1912
Slfn1	1.18825	3.83924	16.855	5.29221e-08	2.55327e-05	9.18874
Ucp2	1.50582	9.17157	16.8372	5.34009e-08	2.55327e-05	9.18024
Mvp	1.63143	8.20271	16.8162	5.39751e-08	2.55327e-05	9.17015
Ccl7	2.65099	6.14238	16.6238	5.95612e-08	2.69552e-05	9.07703
Ccl2	3.50382	7.36188	16.6235	5.95724e-08	2.69552e-05	9.07685
Slfn2	1.53769	7.84403	16.5002	6.3487e-08	2.79665e-05	9.01652
Retnla	-2.31337	7.13969	-16.4699	6.44946e-08	2.79665e-05	9.00157
Scube2	-2.85558	6.92662	-16.4207	6.61639e-08	2.81048e-05	8.9773
Ifitm1	2.32121	7.71166	16.0522	8.03244e-08	3.30159e-05	8.79244
Rassf3	-1.13503	7.68082	-16.0388	8.08979e-08	3.30159e-05	8.78564
Ctla2b	3.09216	8.2274	15.8948	8.73731e-08	3.49728e-05	8.71193
Gbp6	5.09809	9.91242	15.8072	9.15942e-08	3.58909e-05	8.66667
H2-D1	1.01723	5.86935	15.7521	9.43619e-08	3.58909e-05	8.63808
Clec4d	2.68107	5.82186	15.7427	9.48399e-08	3.58909e-05	8.63323
Itga8	-2.60826	5.5132	-15.6543	9.9507e-08	3.68326e-05	8.58704
Prg4	2.45259	8.05413	15.6294	1.00868e-07	3.68326e-05	8.57397
Mitf	-1.14938	8.22414	-15.4021	1.1428e-07	4.04028e-05	8.45358
Sh3kbp1	-1.83101	6.49384	-15.3981	1.14527e-07	4.04028e-05	8.45149
Hmcn1	-1.72636	5.68918	-15.1391	1.32317e-07	4.51484e-05	8.3117
Casq2	-1.17407	11.5579	-15.0858	1.36349e-07	4.57736e-05	8.28258
Klhdc8a	-1.46608	5.57028	-15.0193	1.41566e-07	4.60399e-05	8.2461
Myh7b	-2.0954	6.77672	-14.9668	1.45845e-07	4.63447e-05	8.21715
Hk2	-1.0444	10.6232	-14.9212	1.49677e-07	4.63447e-05	8.19192
Hp	2.86182	8.40812	14.92	1.49784e-07	4.63447e-05	8.19122
Adck4	1.26311	6.37372	14.901	1.5141e-07	4.63447e-05	8.18071
Psmb8	2.14794	6.26193	14.8517	1.55736e-07	4.67343e-05	8.15327
Ccdc141	-1.56849	6.47362	-14.8356	1.57173e-07	4.67343e-05	8.14432
Shisa5	1.32534	9.58789	14.5343	1.87086e-07	5.13422e-05	7.97414
Sybu	-2.20052	5.77167	-14.5308	1.8747e-07	5.13422e-05	7.97212
Tmtc1	1.50406	8.03867	14.4719	1.94038e-07	5.18891e-05	7.9384
Plin4	1.08792	10.3278	14.4682	1.94453e-07	5.18891e-05	7.9363
Stat1	3.05749	7.88846	14.2374	2.22849e-07	5.87138e-05	7.80249
Tspo	1.40469	8.69222	14.2072	2.26887e-07	5.90302e-05	7.78483
1110038B12Rik	1.3703	6.47843	14.0699	2.46328e-07	6.25254e-05	7.70386
Tapbp	2.14962	9.0009	13.9778	2.60403e-07	6.53016e-05	7.64905
Uap1	1.45674	8.32978	13.9309	2.67916e-07	6.63857e-05	7.62096
Clca1	1.30158	3.64553	13.8661	2.78691e-07	6.82431e-05	7.582
Ogn	-2.21217	9.19874	-13.8118	2.88089e-07	6.97241e-05	7.54919
Ripk3	1.47516	5.26692	13.7235	3.04111e-07	7.23053e-05	7.4956
Pnp	1.20166	9.44243	13.7151	3.05701e-07	7.23053e-05	7.49044
Cdkn1a	2.82957	8.15007	13.6814	3.12107e-07	7.2991e-05	7.46988
BC023105	6.52031	6.80794	13.6231	3.2358e-07	7.48332e-05	7.43408
Fkbp5	1.90298	6.33865	13.5539	3.37788e-07	7.55991e-05	7.39143
Fap	-1.29236	5.65096	-13.4986	3.49626e-07	7.74162e-05	7.3572
Slfn8	2.41849	6.01976	13.4594	3.58314e-07	7.81961e-05	7.3328
Igtp	5.06902	9.86929	13.4439	3.6182e-07	7.81961e-05	7.32312
Aqp7	-1.50875	4.38393	-13.4303	3.64916e-07	7.81961e-05	7.31464
Itih5	-1.88293	4.82415	-13.4161	3.68176e-07	7.81961e-05	7.3058
Mt2	5.61965	9.85421	13.2882	3.99133e-07	8.39147e-05	7.22539
Relb	1.60231	6.17009	13.2324	4.13516e-07	8.49573e-05	7.19009
Fcgr4	2.4828	5.09763	13.2218	4.16338e-07	8.49573e-05	7.18331
2410006H16Rik	1.92665	8.27164	13.196	4.23238e-07	8.5527e-05	7.1669
Zbp1	3.06086	6.27608	13.1497	4.35947e-07	8.64172e-05	7.13737
Sdpr	-2.07652	10.0277	-13.0197	4.73932e-07	9.30605e-05	7.05386
Ms4a6d	2.33434	5.08404	12.9454	4.9729e-07	9.65365e-05	7.00571
Eif4ebp1	1.19657	8.94214	12.9201	5.05538e-07	9.65365e-05	6.98923
Cpeb3	-1.51615	8.28632	-12.9201	5.05548e-07	9.65365e-05	6.98921
Serpina3m	2.90523	5.11135	12.7454	5.66761e-07	0.000105223	6.87458
Tgm2	1.47274	9.70857	12.72	5.76317e-07	0.000105223	6.85779
Oas1a	2.67955	7.32882	12.7018	5.83287e-07	0.00010557	6.84571
Car3	-3.17556	5.77073	-12.6558	6.01301e-07	0.000107892	6.81514
Ccl5	3.23964	6.37516	12.6355	6.09452e-07	0.00010842	6.80161
AI607873	2.38252	5.19137	12.5983	6.24727e-07	0.000108958	6.77671
Mef2c	-1.10021	8.34175	-12.5972	6.2517e-07	0.000108958	6.776
Ehbp1	-1.21075	8.73091	-12.59	6.28179e-07	0.000108958	6.77117
Rab3a	-1.07034	8.4345	-12.5211	6.57737e-07	0.000112251	6.72488
Tmem119	1.1826	6.20407	12.5206	6.57954e-07	0.000112251	6.72455
Tap2	2.19299	7.9353	12.461	6.84795e-07	0.000115881	6.68427
Cdc42ep4	1.02537	6.48915	12.4161	7.0578e-07	0.000117521	6.65384
Enc1	1.53463	6.59797	12.3828	7.21816e-07	0.000118652	6.63118
Clec4e	1.02289	3.57243	12.358	7.34059e-07	0.000118652	6.61421
Penk	-3.05639	6.47998	-12.3342	7.45951e-07	0.000119433	6.59799
Ano4	-1.91543	5.16012	-12.2676	7.80507e-07	0.000124011	6.55225
Ifi44	4.3579	6.67918	12.2552	7.8714e-07	0.000124118	6.5437
Flot1	1.11292	10.1728	12.2049	8.14691e-07	0.000126545	6.50893
Ackr1	2.02327	5.56803	12.1704	8.34162e-07	0.000128609	6.48504
Ptprm	-1.00359	8.40691	-12.0376	9.14207e-07	0.000139914	6.39228
1810011O10Rik	-2.22094	8.02188	-11.9927	9.4315e-07	0.000142451	6.36069
1190002N15Rik	-1.06942	6.60169	-11.9907	9.44474e-07	0.000142451	6.35926
Msr1	1.5498	5.39981	11.9761	9.54152e-07	0.000142876	6.34893
Syt12	2.37533	6.26096	11.9273	9.87175e-07	0.000146765	6.31441
Pla2g7	1.38108	6.4926	11.8883	1.01448e-06	0.000148937	6.28673
Sema5a	1.59909	5.31331	11.886	1.0161e-06	0.000148937	6.28511
Nfkbie	1.14593	4.49144	11.8664	1.03015e-06	0.000149634	6.27116
Irak3	2.02565	5.3494	11.8578	1.03644e-06	0.000149634	6.26498
Cp	2.30875	8.44609	11.8496	1.04242e-06	0.000149634	6.25914
Ifi204	3.03042	5.81748	11.826	1.05985e-06	0.000151094	6.2423
Ttll1	-1.33649	6.64733	-11.806	1.07494e-06	0.000152203	6.22793
Plxdc2	-1.08041	5.64611	-11.7634	1.10773e-06	0.00015474	6.19739
Itm2a	-1.70704	7.27574	-11.74	1.12626e-06	0.000155329	6.18052
Efnb3	-1.8785	7.98224	-11.5147	1.32312e-06	0.00017983	6.01649
C130080G10Rik	-1.49538	5.74282	-11.4883	1.3486e-06	0.000181096	5.99703
Xdh	2.23527	9.80212	11.4615	1.37498e-06	0.000183455	5.97726
Cenpa	-1.20565	5.25124	-11.4267	1.41019e-06	0.000185581	5.95146
Gbp3	4.23783	7.9974	11.4243	1.41265e-06	0.000185581	5.94968
Ifit3	5.69822	8.81753	11.3913	1.44691e-06	0.000188225	5.92522
C1s1	2.37517	9.14906	11.3679	1.47176e-06	0.000190268	5.90783
Krt222	-1.09647	4.92292	-11.3477	1.49364e-06	0.000191905	5.89275
Gpr22	-2.8495	5.67454	-11.3015	1.54503e-06	0.000196086	5.85819
Nlrc5	3.97265	6.59786	11.2715	1.5794e-06	0.000198045	5.83569
Cxcl1	4.14103	7.42674	11.2715	1.57949e-06	0.000198045	5.83563
Stat2	2.28786	6.31947	11.2405	1.61596e-06	0.000200205	5.81229
Cilp	-1.72091	5.16513	-11.1851	1.68343e-06	0.000206257	5.77043
Zfp827	-1.19528	5.88378	-11.1841	1.68462e-06	0.000206257	5.7697
Xaf1	1.94084	6.69288	11.134	1.74833e-06	0.000211568	5.7317
Arhgap18	-1.21023	5.30814	-11.1029	1.78929e-06	0.000212813	5.70797
Aldh3a1	1.0847	3.87351	11.088	1.80934e-06	0.000213975	5.69656
Gulp1	-1.22318	4.76657	-11.0695	1.83444e-06	0.000214505	5.68244
Irf9	2.06797	7.03295	11.0518	1.85878e-06	0.000216138	5.66893
Rnf31	1.23679	7.84716	11.0161	1.90923e-06	0.000220771	5.64147
Ifi202b	3.11237	7.5709	10.9967	1.93717e-06	0.000221733	5.62657
Il2rg	1.45647	7.53296	10.9703	1.97602e-06	0.00022454	5.6062
1700040L02Rik	-1.3798	6.24518	-10.9509	2.00507e-06	0.00022454	5.59122
Usp18	4.74598	6.67227	10.9429	2.01721e-06	0.00022454	5.58503
Saa1	2.92783	4.86515	10.934	2.03085e-06	0.00022454	5.57811
Tnfrsf1a	1.39011	9.00128	10.9327	2.03284e-06	0.00022454	5.5771
D15Ertd30e	-1.1942	5.50163	-10.9284	2.03946e-06	0.00022454	5.57377
Art5	1.25907	6.52315	10.9148	2.0605e-06	0.00022454	5.56323
Cyb561	2.20431	6.76557	10.8944	2.09257e-06	0.000226848	5.54737
Asph	-1.13026	7.14212	-10.8657	2.13871e-06	0.000230648	5.52498
Rtp4	2.57506	6.80206	10.8506	2.16326e-06	0.000232093	5.51325
Tmem25	-1.4045	6.312	-10.7574	2.32278e-06	0.000244012	5.44011
Plin2	1.71916	10.1288	10.7365	2.36022e-06	0.000244407	5.42366
Ogfr	1.71954	7.73102	10.613	2.5959e-06	0.000266162	5.32569
Nfkbia	1.84646	9.54767	10.4976	2.83987e-06	0.000283996	5.23311
Fam198b	-1.96518	6.79134	-10.4973	2.84065e-06	0.000283996	5.23283
Il18bp	2.54113	7.538	10.4913	2.85399e-06	0.000283996	5.22799
Sra1	1.01934	9.5866	10.4775	2.88498e-06	0.000284587	5.21686
Ntf3	-1.06089	4.56614	-10.451	2.9457e-06	0.000289207	5.19537
Tap1	1.04619	4.19182	10.4249	3.00676e-06	0.000292762	5.1742
Tmem173	1.55412	5.96536	10.4207	3.01652e-06	0.000292762	5.17085
Snhg6	1.51883	7.40574	10.4175	3.02411e-06	0.000292762	5.16826
Ephb1	-1.08881	5.41761	-10.3805	3.11378e-06	0.000298665	5.13809
Gda	1.31549	7.45381	10.3708	3.13759e-06	0.000299568	5.13022
Fsd2	-1.81811	9.80496	-10.3429	3.20767e-06	0.00030391	5.10741
Slc36a2	-1.14322	7.36899	-10.3411	3.21227e-06	0.00030391	5.10593
Glul	1.12737	10.6964	10.2655	3.41119e-06	0.000315558	5.04384
Rab4b	1.15506	6.94746	10.2563	3.43652e-06	0.000315571	5.03619
Mettl20	2.24399	7.44481	10.2544	3.44166e-06	0.000315571	5.03465
Slc43a3	1.01608	9.31525	10.1393	3.77458e-06	0.000336152	4.93913
Erap1	2.12857	6.64446	10.1318	3.79736e-06	0.000336152	4.9329
Aplnr	-3.09988	7.06734	-10.1059	3.87771e-06	0.000340124	4.91122
Lbp	1.06042	5.82036	10.0947	3.91296e-06	0.000340124	4.90185
Tuba4a	-1.72522	9.91429	-10.0898	3.9285e-06	0.000340124	4.89775
Chil3	3.2501	4.6489	10.0876	3.93551e-06	0.000340124	4.8959
Efhd2	1.66643	8.31734	10.0743	3.97804e-06	0.000340736	4.88477
Nmi	2.3555	8.78205	10.0479	4.06404e-06	0.000343418	4.86261
Ifit1	5.94755	7.93525	10.0407	4.08792e-06	0.000343418	4.85654
2210407C18Rik	4.22978	8.75724	10.0352	4.10622e-06	0.000343418	4.85191
Paqr9	-1.46868	6.81729	-10.0323	4.11614e-06	0.000343418	4.84941
Wnt5a	-1.07137	4.37427	-10.0101	4.1912e-06	0.000343418	4.83069
Adipoq	-4.30676	5.9869	-10.0076	4.19976e-06	0.000343418	4.82857
Casp4	3.05621	6.72529	9.98768	4.26842e-06	0.000347043	4.81176
Cxcl9	4.63449	6.56155	9.97148	4.32531e-06	0.000349429	4.79804
Adar	1.292	7.13711	9.96977	4.33135e-06	0.000349429	4.79659
Ecm2	-1.426	4.28442	-9.95917	4.36907e-06	0.000351111	4.7876
Mad2l2	1.0334	6.51248	9.94047	4.43651e-06	0.00035516	4.77171
Mme	-1.11779	4.55057	-9.92517	4.49252e-06	0.000357961	4.7587
Irgm1	4.2794	8.94489	9.92155	4.5059e-06	0.000357961	4.75562
Gbp2	4.03078	9.88714	9.87119	4.69653e-06	0.000371651	4.71263
5230400M03Rik	1.44258	5.54343	9.86484	4.72119e-06	0.000371651	4.70719
Fam46b	1.57987	5.1169	9.85756	4.74965e-06	0.000371651	4.70095
Sertad4	-2.20385	5.4246	-9.82318	4.88658e-06	0.000379512	4.67145
Sema3f	1.12838	7.30793	9.75006	5.19261e-06	0.000397349	4.60836
Tspan2	-1.32991	5.4159	-9.72655	5.29542e-06	0.000401931	4.58798
Parp12	2.53869	8.59594	9.71449	5.34904e-06	0.000401931	4.57751
Pde4d	-1.46179	6.26276	-9.70486	5.39229e-06	0.000403723	4.56914
Ecscr	1.38289	7.97472	9.69608	5.43205e-06	0.000405243	4.56151
Cd83	-1.20918	4.75983	-9.64595	5.66543e-06	0.000415916	4.51777
Pik3r5	1.05634	4.55282	9.64393	5.67504e-06	0.000415916	4.51601
Aqp1	-1.44036	10.1676	-9.61682	5.80609e-06	0.000423269	4.49226
Homer2	-1.07733	6.33165	-9.61479	5.81604e-06	0.000423269	4.49048
Qpct	-1.3591	4.6847	-9.56771	6.05206e-06	0.000432673	4.44909
Kitl	-1.14045	6.39377	-9.56365	6.07287e-06	0.000432673	4.44551
Fpr1	2.33395	5.0423	9.53983	6.19679e-06	0.000437689	4.42449
Ctla2a	2.21384	9.89794	9.53857	6.20344e-06	0.000437689	4.42337
Upp1	3.06161	7.71818	9.52847	6.25687e-06	0.00043856	4.41444
Pm20d2	-1.30314	8.06035	-9.51696	6.31837e-06	0.000440287	4.40426
Lpin3	1.04294	5.37029	9.51575	6.32486e-06	0.000440287	4.40319
Acsl5	1.03792	8.29043	9.50088	6.40544e-06	0.000443888	4.39001
Khk	1.18892	6.9055	9.48979	6.46627e-06	0.000444188	4.38016
Bcl3	1.62306	5.59195	9.45325	6.67121e-06	0.000456758	4.34766
Mpeg1	2.61863	7.79216	9.4392	6.75192e-06	0.000460523	4.33513
B2m	1.77894	12.18	9.436	6.77045e-06	0.000460523	4.33228
Stmn2	-2.1736	5.23566	-9.39886	6.98965e-06	0.000469299	4.29907
Sell	1.40284	4.69355	9.37749	7.11933e-06	0.000472851	4.27991
Tagln	-2.12636	8.53971	-9.37519	7.13343e-06	0.000472851	4.27784
Snai2	-1.19045	5.46733	-9.34965	7.29229e-06	0.000478023	4.25488
Aspn	-2.44705	6.02173	-9.34627	7.31357e-06	0.000478023	4.25184
1110058L19Rik	-1.13901	9.43909	-9.33139	7.4082e-06	0.000481857	4.23843
Ddx58	1.55056	6.03715	9.27545	7.7763e-06	0.000498018	4.18784
Helz2	1.46197	7.64139	9.25956	7.88448e-06	0.000501858	4.17343
Syde2	-1.28796	8.32151	-9.22827	8.10242e-06	0.000513882	4.14497
AI317395	-1.0155	4.56419	-9.22163	8.1495e-06	0.000514011	4.13892
Gfpt2	1.04424	7.78592	9.19538	8.33868e-06	0.000522916	4.11496
BC002288	1.96171	5.251	9.19507	8.34094e-06	0.000522916	4.11468
Capg	1.16995	5.02101	9.16659	8.55176e-06	0.000530101	4.08861
Jade2	1.04713	6.3022	9.16584	8.55741e-06	0.000530101	4.08792
Igsf6	1.57512	4.49141	9.16044	8.59806e-06	0.000531039	4.08297
Ifih1	3.03947	7.88148	9.1385	8.76545e-06	0.000538183	4.06283
Hcls1	1.69441	5.30046	9.11235	8.96966e-06	0.000545344	4.03877
St3gal1	1.08135	6.0737	9.10359	9.03928e-06	0.000545344	4.03069
Rwdd4a	-1.01755	8.55357	-9.05586	9.429e-06	0.000562336	3.98657
Kcnv2	-1.05175	5.61916	-9.02962	9.65118e-06	0.000570681	3.96222
Iigp1	4.59485	10.2378	9.0167	9.7627e-06	0.00057564	3.95021
Casq1	-1.78253	8.541	-9.00949	9.82549e-06	0.000577705	3.9435
Ank	-1.40377	9.78137	-8.98709	1.00236e-05	0.000586041	3.92263
Fat4	-1.23632	4.79137	-8.97223	1.01575e-05	0.000591732	3.90875
Tnip1	1.20981	9.66555	8.96999	1.01778e-05	0.000591732	3.90666
Il1r2	1.20336	4.50557	8.96617	1.02126e-05	0.000592104	3.90308
BB144871	-1.46858	3.78074	-8.95809	1.02866e-05	0.000594738	3.89553
Mylk4	-1.95599	7.86483	-8.94862	1.03742e-05	0.000597606	3.88666
Cdkn1c	-1.88538	6.59698	-8.94652	1.03936e-05	0.000597606	3.8847
Pank1	-1.16996	6.76196	-8.93697	1.04829e-05	0.000601079	3.87575
Ppargc1a	-1.53464	8.29669	-8.91896	1.06537e-05	0.000607521	3.85884
Stat3	1.02742	8.07169	8.91253	1.07154e-05	0.000609371	3.8528
Fcrls	-1.04558	4.81871	-8.84729	1.1364e-05	0.000636389	3.79128
Trim30a	2.4076	6.89846	8.84114	1.14272e-05	0.000637658	3.78546
Dnmt3a	-1.11045	6.44004	-8.82103	1.16371e-05	0.000645903	3.7664
Cytl1	-2.68059	6.35348	-8.81378	1.17138e-05	0.000647446	3.75952
Col8a1	-1.21166	5.62726	-8.8077	1.17786e-05	0.000648569	3.75374
Mlkl	2.37336	6.35871	8.77756	1.21053e-05	0.000663962	3.72508
Cxcr4	-1.60283	4.60495	-8.77316	1.21539e-05	0.000663962	3.72088
Irgm2	4.63917	8.41622	8.77066	1.21816e-05	0.000663962	3.7185
Dtx3l	2.72233	8.71492	8.77029	1.21857e-05	0.000663962	3.71814
Dram1	1.68028	6.91374	8.7457	1.24617e-05	0.00067371	3.69467
Plekhh1	-1.62186	5.65377	-8.72308	1.27218e-05	0.000683671	3.67302
Cebpd	1.97505	6.99978	8.72113	1.27445e-05	0.000683671	3.67115
Pnpla2	1.09748	7.25904	8.71643	1.27994e-05	0.000684851	3.66665
Fam46a	1.29837	8.24608	8.68646	1.31556e-05	0.000696745	3.63787
Cd274	5.34362	7.7136	8.66863	1.33726e-05	0.00070644	3.62072
5330406M23Rik	1.33678	8.94602	8.6616	1.34593e-05	0.000707428	3.61394
Tspan12	-1.09859	6.98962	-8.65152	1.35847e-05	0.000708368	3.60422
Dhx58	1.11438	4.02239	8.63924	1.37392e-05	0.000708796	3.59236
Pon1	-1.08902	4.87029	-8.62511	1.39193e-05	0.000711832	3.5787
Ier3	1.95441	9.66732	8.62025	1.39818e-05	0.000713278	3.57399
Igf1	-1.77209	6.15531	-8.58879	1.43943e-05	0.000730739	3.54349
Agmo	-1.85395	4.57497	-8.55911	1.47957e-05	0.000745662	3.51463
Gpr133	1.58633	6.98501	8.46102	1.6213e-05	0.000805386	3.4186
Parp14	2.43897	6.94508	8.45326	1.63312e-05	0.000809329	3.41096
Saa2	1.3041	4.47247	8.44788	1.64138e-05	0.000811488	3.40567
Lpxn	1.38392	4.38724	8.41721	1.68936e-05	0.000829301	3.3754
Kctd12b	-1.42849	6.17206	-8.40739	1.70505e-05	0.000833384	3.36569
Cygb	-1.11718	9.01997	-8.40699	1.70569e-05	0.000833384	3.3653
Phf11d	3.21032	7.51594	8.38764	1.73707e-05	0.000844752	3.34614
Sostdc1	1.73835	4.74062	8.37721	1.75426e-05	0.000849142	3.33579
LOC102635316	-1.33824	5.11386	-8.37364	1.76019e-05	0.000850038	3.33224
Anxa7	1.53414	8.13933	8.32992	1.83456e-05	0.000877807	3.28875
Lum	-1.84378	10.3521	-8.31629	1.85845e-05	0.000887195	3.27515
Pkdcc	-1.30262	7.618	-8.29922	1.88885e-05	0.000897753	3.25809
Alkbh7	-1.2694	9.16389	-8.28265	1.91889e-05	0.000906306	3.2415
Dcakd	-1.73118	6.7065	-8.25157	1.97666e-05	0.000928718	3.21031
Ifi47	3.84998	7.85654	8.23222	2.01359e-05	0.000935405	3.19084
Tmem45b	-1.35348	3.8622	-8.23165	2.01469e-05	0.000935405	3.19026
Selp	2.84229	5.37501	8.1906	2.09562e-05	0.000958643	3.14883
Col6a3	-2.07486	7.35587	-8.1475	2.18446e-05	0.000985934	3.10514
C3	2.00007	10.6727	8.14628	2.18704e-05	0.000985934	3.1039
Cpxm1	-1.09988	4.55404	-8.14333	2.19328e-05	0.000985983	3.10089
Vit	-1.07188	4.4918	-8.13533	2.21029e-05	0.000989866	3.09276
Uck2	1.13249	6.3007	8.06172	2.37389e-05	0.00104022	3.01758
Gsdmd	1.23288	6.78374	8.05779	2.38298e-05	0.001042	3.01356
Reep1	-2.08287	7.0392	-8.04517	2.41246e-05	0.00104803	3.00061
Herc6	3.20715	6.13057	8.04424	2.41466e-05	0.00104803	2.99965
Hsd11b1	1.23686	9.16283	8.03902	2.42697e-05	0.00104803	2.99429
Sytl2	-1.77645	5.42564	-8.02119	2.4696e-05	0.00106203	2.97595
Ralgapa2	-1.0529	7.04644	-8.00593	2.50675e-05	0.00107137	2.96023
Nrep	-1.73768	6.80482	-7.97942	2.57271e-05	0.00108178	2.93286
4833438C02Rik	1.05078	4.77516	7.94868	2.65164e-05	0.00110837	2.90102
Ifitm6	1.62119	4.95361	7.94819	2.65291e-05	0.00110837	2.90052
Tlr2	3.16565	6.61202	7.94495	2.66139e-05	0.00110837	2.89716
Tapbpl	2.04442	4.92453	7.94451	2.66255e-05	0.00110837	2.89669
Akr1c14	-2.2722	4.41783	-7.94205	2.669e-05	0.00110884	2.89414
Fas	1.83573	7.96843	7.93234	2.69467e-05	0.00111505	2.88406
Trim25	1.21644	7.61712	7.92874	2.70425e-05	0.00111679	2.88032
Myl9	-2.35079	9.14384	-7.91787	2.73342e-05	0.0011266	2.86901
Fgf12	-1.79769	6.7001	-7.91333	2.74568e-05	0.00112942	2.86429
Igf2	-1.01095	5.5632	-7.91108	2.75179e-05	0.0011297	2.86195
Tcf23	1.38725	5.06239	7.88844	2.81411e-05	0.00114285	2.83834
Pla2g5	-1.31461	6.34856	-7.86644	2.87614e-05	0.00116241	2.81536
Birc3	1.34746	7.15822	7.85104	2.92046e-05	0.00117462	2.79923
Oasl1	3.13691	6.28206	7.84813	2.92893e-05	0.00117462	2.79618
Smtn	-1.38444	8.15567	-7.81643	3.02284e-05	0.00119944	2.7629
Rpa3	-1.26314	7.00566	-7.81085	3.03971e-05	0.00120138	2.75703
Slc41a2	1.10209	5.25141	7.77703	3.14423e-05	0.00123169	2.72137
Dynll2	-1.04911	9.77585	-7.7739	3.15408e-05	0.00123169	2.71807
Lgals9	1.61786	8.56498	7.75094	3.22753e-05	0.00125165	2.69378
Sbno2	1.63208	6.1006	7.73105	3.29269e-05	0.00126051	2.67269
Col14a1	-1.34324	4.88487	-7.7303	3.29517e-05	0.00126051	2.6719
Eif2ak2	1.76505	5.98127	7.70978	3.36394e-05	0.00127073	2.6501
Wars	1.90452	8.04659	7.7033	3.38598e-05	0.00127673	2.64321
Tspan4	1.4966	8.73347	7.69076	3.4291e-05	0.00128826	2.62986
Osmr	1.64405	6.18001	7.68836	3.43743e-05	0.00128826	2.6273
8430408G22Rik	1.31535	9.89524	7.68547	3.44748e-05	0.00128826	2.62422
Cenpj	1.90886	6.14753	7.67773	3.47457e-05	0.00129605	2.61595
Socs3	3.58861	7.62001	7.66792	3.50921e-05	0.00130663	2.60548
Cidec	-1.10189	4.08861	-7.65365	3.5603e-05	0.00132093	2.59023
Ddx26b	-1.131	6.26793	-7.64984	3.57405e-05	0.00132132	2.58616
Kcnd2	-1.12073	6.11651	-7.64632	3.58684e-05	0.0013237	2.58239
Trim68	1.64352	6.91424	7.63991	3.61024e-05	0.00132595	2.57552
C2	1.38234	5.91788	7.63768	3.61843e-05	0.00132595	2.57313
Tbrg1	1.23503	8.50765	7.62939	3.64902e-05	0.00132888	2.56424
Col15a1	-1.47214	7.43505	-7.62303	3.67268e-05	0.00133205	2.55742
9430047G12Rik	-1.43931	7.40946	-7.60531	3.73949e-05	0.00134196	2.53838
Gucy1b3	-1.4218	7.17689	-7.57999	3.83731e-05	0.00136447	2.51112
Tacc2	1.46838	12.0786	7.57891	3.84154e-05	0.00136447	2.50995
Chil1	1.11263	5.30348	7.56964	3.8781e-05	0.00137364	2.49995
Lmod3	-2.35462	8.43239	-7.55185	3.94932e-05	0.00138749	2.48073
Strip2	-1.35515	7.84861	-7.54929	3.95968e-05	0.00138749	2.47796
Ppargc1b	-1.54801	8.71746	-7.54121	3.99258e-05	0.00139315	2.46922
Mrc1	-1.25382	7.74407	-7.52583	4.05608e-05	0.00140802	2.45256
Gm4951	3.85085	6.08298	7.47696	4.26526e-05	0.00146886	2.39943
Mtfp1	-2.31725	9.14379	-7.476	4.26953e-05	0.00146886	2.39837
H2-M3	1.2185	7.33386	7.46077	4.33716e-05	0.00148966	2.38177
Comt	1.30858	10.5866	7.45648	4.35646e-05	0.00149137	2.37707
Mt1	2.31911	9.23044	7.44955	4.38776e-05	0.00149471	2.36951
Ptgfr	-1.22985	4.37925	-7.41213	4.56128e-05	0.00153871	2.32852
Mmp3	3.4955	6.7124	7.40588	4.59103e-05	0.0015459	2.32165
AW112010	1.25182	9.29026	7.38927	4.67103e-05	0.00156132	2.30339
Epha4	-1.65747	6.14255	-7.38182	4.70736e-05	0.00156266	2.2952
AI956758	-1.25947	5.58971	-7.3784	4.7242e-05	0.00156341	2.29142
Lox	2.16644	5.86269	7.37322	4.74975e-05	0.00156426	2.28572
Rrp12	1.75481	6.7021	7.3706	4.76273e-05	0.00156606	2.28284
Birc2	1.17286	8.71069	7.34021	4.91635e-05	0.00159391	2.24928
Cmtm8	-1.47416	6.46739	-7.30565	5.09766e-05	0.00163235	2.21098
Abcc3	1.54265	5.24468	7.29886	5.13414e-05	0.00163397	2.20344
Tor3a	1.3337	5.53913	7.27972	5.23851e-05	0.00166211	2.18216
Adcy7	-1.13751	5.14995	-7.24313	5.44455e-05	0.00171571	2.14136
6720475J19Rik	-1.23211	11.2423	-7.24099	5.45689e-05	0.00171571	2.13896
Hdhd3	-1.30405	6.03116	-7.23712	5.47925e-05	0.00172014	2.13464
Tinagl1	1.59366	8.84772	7.22845	5.52974e-05	0.00173077	2.12493
Thbs2	-1.24879	5.90783	-7.22365	5.55791e-05	0.00173301	2.11956
Sipa1l2	-1.32625	7.47831	-7.22295	5.56203e-05	0.00173301	2.11877
Tbc1d10c	-1.84932	6.03552	-7.18978	5.76114e-05	0.00177311	2.08156
Ms4a8a	1.49429	4.3975	7.18957	5.76245e-05	0.00177311	2.08132
Psat1	1.77565	5.04561	7.18878	5.76724e-05	0.00177311	2.08044
Spidr	1.26338	5.28106	7.17719	5.83879e-05	0.00178456	2.0674
Klhl30	-1.64542	7.67235	-7.17047	5.88066e-05	0.00179472	2.05984
Fads3	1.27728	7.46328	7.15867	5.95504e-05	0.00181211	2.04654
P2ry1	-1.23737	5.73667	-7.11771	6.2213e-05	0.00187452	2.00025
Pcsk6	-2.46811	6.83975	-7.11751	6.22261e-05	0.00187452	2.00003
Cyp1b1	1.9828	5.69854	7.11417	6.24488e-05	0.00187452	1.99625
Cyp4b1	1.13966	9.24643	7.1133	6.2507e-05	0.00187452	1.99526
Gbp7	3.39777	9.33302	7.11203	6.25921e-05	0.00187452	1.99382
Rnf213	1.42854	6.85522	7.10968	6.27499e-05	0.00187654	1.99116
Adrb1	-1.02595	7.31064	-7.10835	6.28398e-05	0.00187654	1.98964
Slc18b1	-1.27897	5.44278	-7.09756	6.35702e-05	0.00189292	1.97741
Igf2bp2	1.65973	5.36857	7.09552	6.371e-05	0.00189437	1.97509
Znfx1	1.23132	8.07588	7.07262	6.5296e-05	0.00192262	1.94906
Gas1	-1.38754	7.23637	-7.0707	6.54309e-05	0.00192262	1.94687
Tmem176b	1.18982	9.66131	7.05716	6.63915e-05	0.0019356	1.93145
Myd88	1.88244	7.89833	7.05706	6.63986e-05	0.0019356	1.93133
Nr3c2	-1.12876	6.49466	-7.05366	6.66422e-05	0.00193742	1.92746
Slc10a6	3.82862	8.26066	7.05205	6.67575e-05	0.00193792	1.92563
Itgbl1	-2.02566	5.62502	-7.0345	6.80331e-05	0.00195856	1.90559
Hccs	-1.13452	8.44286	-7.00593	7.01673e-05	0.00200613	1.87289
Slc11a1	1.47669	5.98515	7.00432	7.02899e-05	0.00200677	1.87104
Fbln5	-1.00173	5.57383	-7.00115	7.05315e-05	0.00200677	1.86741
Samhd1	2.08413	7.41274	6.97815	7.23125e-05	0.00203669	1.841
Itgb1bp2	-1.10043	10.8311	-6.97678	7.24201e-05	0.00203696	1.83943
Fbxo31	1.51091	9.09933	6.97022	7.29381e-05	0.002046	1.83188
Serping1	1.01484	11.0828	6.96344	7.34781e-05	0.00205616	1.82407
Heyl	-1.06098	5.79201	-6.94585	7.48983e-05	0.00207852	1.80379
Lgals3	1.64002	7.02704	6.94099	7.52956e-05	0.00207852	1.79819
Tril	-1.45087	5.15293	-6.92832	7.63436e-05	0.00210314	1.78355
Ung	-1.63463	6.30027	-6.92519	7.66051e-05	0.00210629	1.77993
Egln3	-1.43051	7.8398	-6.91383	7.75615e-05	0.00212696	1.76679
Nid2	-1.13136	5.79022	-6.90708	7.81359e-05	0.00213708	1.75897
Doc2g	-1.09507	9.31546	-6.90068	7.8685e-05	0.00214928	1.75156
Actg2	-1.48189	6.42971	-6.88316	8.02097e-05	0.00217431	1.73123
Tmem86a	-1.7027	7.75056	-6.87992	8.04955e-05	0.00217536	1.72746
Grk5	1.08933	6.97797	6.87169	8.12253e-05	0.00218709	1.7179
2200002D01Rik	1.27376	5.70773	6.86642	8.16966e-05	0.00219694	1.71177
Vegfa	-1.26787	7.73082	-6.85384	8.28345e-05	0.00221324	1.69712
Mgl2	-1.05032	4.15575	-6.84911	8.32667e-05	0.00222194	1.69161
Olfml2b	-1.00832	8.02998	-6.82556	8.54555e-05	0.00226006	1.66412
Itgb2	1.59516	6.23796	6.82064	8.5921e-05	0.00226662	1.65836
Lingo3	-1.0696	5.3434	-6.81522	8.64367e-05	0.00227482	1.65202
Trafd1	1.44274	8.95398	6.803	8.76121e-05	0.00229379	1.63771
Obscn	-1.63104	10.651	-6.79612	8.82806e-05	0.00229703	1.62966
Rap1gap2	-1.32349	8.45998	-6.79467	8.84223e-05	0.00229766	1.62796
Cd38	1.26701	6.46978	6.76631	9.12467e-05	0.00235342	1.59464
Ppp1r14c	-1.3318	10.2488	-6.75808	9.20847e-05	0.00235972	1.58496
Tmprss13	-1.6731	4.51175	-6.75723	9.21711e-05	0.00235972	1.58396
Jak2	1.0791	7.50516	6.75195	9.27138e-05	0.00236779	1.57774
Retn	-1.02479	6.19055	-6.74907	9.30108e-05	0.00237196	1.57435
Pyhin1	1.17723	3.75784	6.74556	9.33748e-05	0.00237592	1.57021
Abca8b	-1.10741	5.62908	-6.73245	9.47475e-05	0.00240204	1.55475
Lman1l	1.98959	5.19457	6.71347	9.67741e-05	0.00243551	1.53232
Tmem246	-1.01893	8.83603	-6.67697	0.000100807	0.00251281	1.48904
Samd9l	1.3494	7.84696	6.65939	0.000102814	0.00254854	1.46815
Ndrg4	-1.1105	10.3389	-6.60223	0.000109649	0.00268977	1.39992
Lyrm9	-1.13352	6.44609	-6.59357	0.000110727	0.00270406	1.38955
Lamb3	-1.2294	6.25799	-6.59055	0.000111106	0.00270406	1.38593
Rnf207	-1.66135	7.55201	-6.5899	0.000111188	0.00270406	1.38515
Acot1	1.54983	6.46303	6.58974	0.000111208	0.00270406	1.38496
Fcer1g	1.42875	7.17247	6.57953	0.0001125	0.00272276	1.37271
Actr3b	-1.22934	8.68524	-6.55382	0.000115827	0.00278385	1.34181
Jph2	-1.22868	8.63625	-6.54334	0.000117215	0.00281072	1.32918
Tmem38b	1.52878	7.33266	6.5403	0.000117619	0.00281718	1.32553
Slc39a14	2.06184	6.66909	6.53854	0.000117855	0.00281958	1.32341
Slc24a3	-1.09005	5.59731	-6.4943	0.000123951	0.00290858	1.26994
Slc6a12	1.34978	4.48713	6.47643	0.00012651	0.00295152	1.24826
Il33	2.37215	7.33141	6.46585	0.000128052	0.00296802	1.23541
Gclm	1.34677	7.28064	6.46009	0.0001289	0.00298433	1.22842
Tmem163	-1.24956	6.30172	-6.44876	0.000130586	0.00301333	1.21463
Cdh19	-1.07272	4.63084	-6.44274	0.000131492	0.00302753	1.2073
Mmachc	-1.02909	8.51438	-6.44055	0.000131823	0.00302987	1.20464
Fxyd5	1.04893	8.34285	6.44014	0.000131885	0.00302987	1.20413
Nfkbiz	2.43528	6.73098	6.43751	0.000132285	0.00302987	1.20093
Snhg1	1.36372	6.55162	6.43458	0.000132731	0.00303256	1.19736
Hspb3	-1.12484	7.63824	-6.42959	0.000133495	0.00304667	1.19127
Perm1	-1.2518	5.87956	-6.41656	0.000135513	0.00308258	1.17536
Pgf	2.54527	7.78849	6.4154	0.000135694	0.00308292	1.17395
Traf3ip2	1.01543	6.4614	6.41457	0.000135824	0.00308292	1.17293
Casp12	2.139	7.39756	6.40828	0.000136811	0.00309521	1.16525
Parp9	2.68704	8.66191	6.39682	0.000138632	0.00312339	1.15123
Manba	-1.51849	5.58069	-6.39667	0.000138657	0.00312339	1.15103
Chac2	-1.43041	7.67437	-6.38126	0.000141148	0.00316287	1.13215
Ppil1	-1.70801	7.8189	-6.37208	0.000142654	0.00317561	1.12089
AI314604	-1.42957	4.73022	-6.37026	0.000142955	0.00317892	1.11866
Scn7a	-1.43985	7.10271	-6.35862	0.000144896	0.00320991	1.10435
Cnn1	-1.85642	5.60231	-6.34783	0.00014672	0.00323499	1.09109
Lrrc39	-1.01258	7.44262	-6.34184	0.000147744	0.00325411	1.08371
Ankrd2	3.26445	6.60601	6.33222	0.000149404	0.00327462	1.07186
Cblb	1.4147	6.89747	6.30663	0.000153921	0.00333719	1.04027
Serpinb9	1.34075	6.74311	6.28131	0.000158538	0.00340187	1.00891
Rhoc	1.26313	9.06274	6.27735	0.000159273	0.00341163	1.00401
Mfap4	-1.65788	6.94377	-6.26015	0.000162511	0.00344101	0.982655
Cish	1.10978	9.08427	6.25905	0.000162721	0.00344195	0.981284
Kcnj3	-1.48487	7.10918	-6.2567	0.000163169	0.00344442	0.97837
Rnf19b	2.4882	7.34451	6.25283	0.000163912	0.00345311	0.973548
Prkd1	-1.14784	5.79928	-6.24845	0.000164755	0.00345675	0.968109
Cxcl16	1.24689	6.37129	6.24749	0.00016494	0.00345675	0.966916
Mmp15	-1.92241	6.64862	-6.24676	0.000165082	0.00345675	0.966006
Litaf	1.46994	8.29664	6.2171	0.000170936	0.00355062	0.929036
Lpin1	-1.43738	8.86845	-6.20679	0.000173025	0.003587	0.916151
Sdf2l1	1.04985	6.43686	6.20234	0.000173934	0.00359867	0.910594
Synm	-1.69918	5.84663	-6.17958	0.000178669	0.00366123	0.882099
Camk1d	-1.21408	4.95137	-6.17491	0.000179657	0.00366928	0.876247
Reck	-1.37537	5.88262	-6.17389	0.000179876	0.00366928	0.87496
Colec12	-1.17804	4.78579	-6.17246	0.000180179	0.00366951	0.873174
9630010G10Rik	-1.47299	8.38487	-6.16259	0.000182295	0.00369813	0.860787
Lynx1	-1.25396	9.47434	-6.15932	0.000183002	0.00370887	0.856676
Ikbke	1.78486	5.62155	6.149	0.000185253	0.00374355	0.843707
Ube2l6	2.003	6.09099	6.14142	0.000186926	0.00376275	0.834169
Cstb	1.05931	8.91354	6.1405	0.000187131	0.00376323	0.833009
Slc44a2	1.31314	8.68114	6.12711	0.00019013	0.0038015	0.816141
Reg3b	2.04673	4.18402	6.1201	0.00019172	0.00382228	0.807304
Iqgap2	-1.60313	5.92726	-6.11557	0.000192755	0.00383924	0.801591
Csrp2	-1.38062	7.94813	-6.11032	0.000193965	0.00385596	0.794951
Pfkfb3	1.68725	5.81003	6.10369	0.000195502	0.00387173	0.786577
Tgfbi	-1.10436	7.14005	-6.09861	0.000196689	0.00388046	0.780156
Lrrc3b	-1.79645	7.57999	-6.09568	0.000197378	0.00388523	0.776448
Hey1	-1.8373	6.53573	-6.08079	0.000200915	0.00393401	0.7576
Fcgr2b	1.03838	5.78331	6.07751	0.000201704	0.00394485	0.753446
Pitpnc1	-1.01504	7.17043	-6.07691	0.000201848	0.00394485	0.752686
Vstm4	-1.09356	6.25604	-6.0735	0.000202672	0.00395723	0.748366
A130040M12Rik	1.88967	6.86833	6.06514	0.000204709	0.00398532	0.737756
Emilin2	-1.33075	7.46001	-6.06446	0.000204876	0.00398532	0.736888
Lama2	-1.09639	8.9828	-6.06334	0.000205151	0.00398694	0.735466
Cyp7b1	1.42177	4.50848	6.02847	0.000213907	0.00411484	0.691124
Cxcl13	3.47153	7.83595	6.01629	0.000217061	0.00416397	0.675594
Cdc14b	-1.19379	7.3683	-6.01096	0.000218456	0.00418687	0.668796
Mbd1	2.71394	6.38424	5.97568	0.000227948	0.00431711	0.62367
Efhd1	-1.68707	4.93128	-5.97052	0.000229374	0.00433657	0.617051
Tmem140	1.19508	6.02761	5.96143	0.000231909	0.00437223	0.605393
Pml	1.29115	5.71678	5.95407	0.000233985	0.00439062	0.595938
Map3k8	2.45998	6.08663	5.95072	0.000234933	0.00439146	0.591644
Smarcd3	-1.00798	8.61147	-5.9505	0.000234996	0.00439146	0.591362
Tcf15	-1.54936	7.60568	-5.91117	0.000246486	0.00454325	0.540712
Abca8a	-3.17201	9.13471	-5.91112	0.000246502	0.00454325	0.540646
Tmem204	-1.16693	7.07111	-5.89738	0.000250659	0.00459889	0.522899
Itpkc	1.00954	6.21459	5.89365	0.0002518	0.00460947	0.518082
Slc22a3	-1.63932	5.88438	-5.88962	0.00025304	0.00461997	0.512872
Ltbp4	-2.13933	8.09299	-5.88844	0.000253403	0.00462256	0.511348
Kcna1	-1.02454	4.47979	-5.88424	0.000254705	0.00463007	0.505913
Shroom3	1.10748	6.58711	5.87451	0.000257749	0.00467316	0.493307
Hlf	-1.6076	6.54567	-5.83145	0.000271697	0.00484585	0.437392
Acot9	1.2388	9.15518	5.82645	0.000273369	0.00487139	0.430884
Ms4a4c	2.19482	4.98784	5.81381	0.000277647	0.00490584	0.414411
AI464131	-1.02304	7.18814	-5.81035	0.000278832	0.00491637	0.409892
Ctps	2.15242	9.44193	5.80801	0.000279633	0.00491994	0.406848
Gprc5b	1.47692	5.67765	5.79188	0.000285242	0.0049933	0.385778
Map3k6	2.04439	6.77199	5.78232	0.000288625	0.00503558	0.37327
G0s2	-1.28759	8.75384	-5.78056	0.000289251	0.00503805	0.370972
Pde7a	-1.23161	7.1558	-5.77881	0.000289875	0.0050447	0.368684
Tcea3	-1.13055	8.34921	-5.75757	0.000297585	0.0051452	0.340839
Comp	-1.56605	5.55775	-5.75223	0.000299555	0.00516994	0.333837
Gucy1a3	-1.30282	6.53608	-5.74645	0.000301707	0.00518557	0.326244
Vcam1	1.13165	7.04199	5.73741	0.000305105	0.00521073	0.314363
Mmp8	1.15018	3.98499	5.73316	0.000306716	0.00523277	0.308776
Mybphl	-1.66635	8.89773	-5.70607	0.000317208	0.00533741	0.273092
Lrtm1	-2.31991	8.07293	-5.70109	0.000319181	0.00535761	0.266516
Gbp2b	2.36673	4.82606	5.69636	0.000321065	0.00537622	0.260274
Vwa5a	1.22846	5.76752	5.67697	0.00032892	0.00548129	0.234633
Slc2a1	1.07664	7.38485	5.67391	0.000330176	0.00549344	0.230588
Hhatl	-1.0761	9.57282	-5.65276	0.00033902	0.00559319	0.202551
Pirb	1.32936	5.14485	5.6525	0.000339128	0.00559319	0.202212
Tuba8	-2.29815	8.00736	-5.62839	0.000349528	0.00573292	0.170172
Rbm20	-1.27832	9.47238	-5.62014	0.000353165	0.00576079	0.159192
Myl7	-1.06549	12.7104	-5.61531	0.000355312	0.00579128	0.152763
Hdc	2.87669	5.95094	5.60902	0.00035813	0.00580992	0.144383
Serpinf1	-1.03046	7.67643	-5.60357	0.000360595	0.00581816	0.137108
Tnfaip3	2.08096	6.15176	5.59101	0.000366339	0.0058738	0.120346
Ch25h	2.09851	5.56747	5.59033	0.00036665	0.0058738	0.119445
Rgs5	-1.16897	9.19852	-5.58026	0.000371332	0.00591348	0.105987
Hck	2.34237	5.31841	5.57301	0.000374746	0.005961	0.0962833
Cebpb	1.72471	8.07863	5.5359	0.000392749	0.00616963	0.0465184
Tcirg1	1.00246	6.64844	5.53299	0.000394195	0.00618295	0.0426211
Ifit2	4.20393	8.80674	5.51482	0.00040339	0.00627515	0.0181687
Myct1	-1.77513	6.28391	-5.50612	0.000407873	0.0063095	0.00644869
Tmem176a	1.25415	7.23883	5.50569	0.000408093	0.0063095	0.00587535
Pim1	1.44231	6.43588	5.50143	0.000410313	0.00633081	0.00012177
2023-09-04	-1.20195	7.08046	-5.47415	0.000424817	0.0064968	-0.0367135
Meox2	-1.44444	7.09966	-5.45576	0.000434909	0.00660744	-0.0616081
Cxcl2	4.48013	5.38059	5.45255	0.000436694	0.00662488	-0.0659502
Bex1	-2.39471	5.5902	-5.43619	0.000445933	0.00674056	-0.0881487
Fbxw7	-1.56846	8.15393	-5.43205	0.000448303	0.00675179	-0.0937695
Abca9	-1.13367	5.33762	-5.42141	0.000454461	0.00680515	-0.108234
Tnfaip6	1.08086	5.52421	5.41811	0.00045639	0.00681931	-0.112724
Pnpo	1.12195	7.00104	5.41671	0.00045721	0.00682666	-0.114627
8030447M02Rik	-1.11164	5.85378	-5.4062	0.000463425	0.00687998	-0.128942
Ddit4	1.35719	8.79295	5.4044	0.000464495	0.00689095	-0.131388
Arrdc4	1.61388	5.85932	5.40051	0.000466826	0.00689604	-0.136694
Dpt	-1.54553	10.0457	-5.39698	0.000468951	0.00691761	-0.14151
Ada	1.61125	4.69003	5.39419	0.000470633	0.0069375	-0.145304
Bdh1	-1.11808	8.80845	-5.36051	0.000491516	0.0071397	-0.191329
Il17ra	1.29798	5.55861	5.36045	0.000491553	0.0071397	-0.191409
Npr3	-1.14081	5.34412	-5.34871	0.000499064	0.00721215	-0.207483
Gm11627	-1.12062	5.03375	-5.34833	0.000499314	0.00721215	-0.208013
Postn	-1.37969	8.55223	-5.34126	0.000503898	0.00726324	-0.2177
Fhl2	-1.57608	11.9925	-5.33339	0.000509061	0.00732246	-0.228506
Pim3	1.22638	7.53299	5.30718	0.000526659	0.00748252	-0.264527
Cntn5	2.08583	4.67842	5.30364	0.000529089	0.00750168	-0.269405
Itgb3	1.26051	4.83438	5.29122	0.000537697	0.00757244	-0.286509
Ctss	1.04859	8.50079	5.28451	0.000542416	0.00761798	-0.295769
Cd300lf	1.01978	5.07047	5.28358	0.000543076	0.00762211	-0.297058
Matn2	-1.34867	5.2823	-5.27245	0.000551007	0.0077178	-0.312421
Inmt	-2.7638	6.64883	-5.2563	0.000562741	0.0078138	-0.33475
Ngp	2.35125	5.62802	5.25525	0.000563512	0.00781929	-0.336201
Ms4a6c	1.63086	6.95544	5.2542	0.000564286	0.00782481	-0.337656
Zfp697	1.02543	4.77121	5.2473	0.000569399	0.00787603	-0.347214
Ppara	-1.10961	8.34663	-5.24717	0.000569493	0.00787603	-0.347389
Mx2	1.78573	6.15617	5.24438	0.000571575	0.0078963	-0.351256
Ebf3	-1.0061	6.06579	-5.23504	0.0005786	0.00794497	-0.364199
Tspan13	-2.00872	9.112	-5.23406	0.000579344	0.00794497	-0.365561
Apobec1	1.14094	5.6773	5.22353	0.000587391	0.00802741	-0.380175
Hmox1	2.32348	6.81567	5.21645	0.000592866	0.00808115	-0.390005
Zfp770	-1.13251	6.90462	-5.1987	0.000606847	0.00819421	-0.414699
Serpina3i	1.8601	4.41475	5.19098	0.000613032	0.00825333	-0.425441
3930401B19Rik	1.60861	11.8603	5.17032	0.000629939	0.00837798	-0.45426
Adh1	1.64232	8.5529	5.15558	0.000642313	0.00848823	-0.474865
Pah	-1.47167	8.91981	-5.14671	0.000649881	0.00854492	-0.487271
Nr1d2	-1.11718	8.13725	-5.14006	0.000655614	0.00860943	-0.496573
Scd2	-1.01174	6.77252	-5.12048	0.000672836	0.00877956	-0.524036
Rtn4rl2	1.22802	6.04775	5.11859	0.000674523	0.00878568	-0.526687
Gm3916	-1.67484	6.65957	-5.11769	0.000675326	0.00879064	-0.527947
Mest	-1.11523	6.33882	-5.10125	0.00069022	0.00893423	-0.551048
Tmod1	-1.07728	10.6835	-5.09968	0.000691659	0.00894173	-0.553253
Mtus1	1.24484	9.58819	5.09598	0.000695067	0.008974	-0.558459
Cxcl14	1.16813	7.56243	5.09419	0.000696725	0.00898491	-0.560982
Clec2d	1.19515	5.54444	5.08932	0.000701246	0.00902896	-0.56783
Lgalsl	1.62696	9.90875	5.084	0.000706232	0.00906656	-0.575332
Asb15	-1.09284	7.28321	-5.07719	0.000712659	0.00912776	-0.584924
Clec7a	-1.10005	4.90214	-5.07384	0.000715841	0.00915767	-0.589641
A330021E22Rik	1.16287	3.87069	5.06018	0.000728995	0.00926897	-0.608919
Lrrn4	-1.26856	4.84587	-5.05866	0.000730475	0.00928211	-0.611066
Abhd1	1.65938	7.98904	5.05739	0.000731716	0.00928655	-0.612864
1200007C13Rik	2.18404	5.87164	5.04008	0.000748832	0.00943075	-0.637341
Maff	1.671	6.1426	5.03867	0.000750242	0.00943075	-0.639332
Arhgap8	1.12428	5.38861	5.03837	0.000750541	0.00943075	-0.639755
Isg20	1.46626	6.95389	5.03558	0.000753349	0.0094459	-0.643707
Plscr4	-1.00967	5.39645	-5.0308	0.000758185	0.0094894	-0.650482
Plxnd1	-1.04277	8.17406	-5.02704	0.000762003	0.00953145	-0.655798
Gdf10	-1.13575	4.53262	-5.02553	0.000763546	0.00954501	-0.657939
Cxcl5	4.8339	5.53594	5.02467	0.000764428	0.0095503	-0.659161
Pvr	1.2896	5.78189	5.01929	0.000769955	0.00960206	-0.666787
Adamts4	2.42447	5.09251	5.01856	0.000770706	0.00960568	-0.667819
Srpx2	-1.04805	5.10348	-5.01296	0.000776516	0.00966073	-0.675767
Pnpla7	1.25223	6.95041	5.00351	0.000786424	0.0097325	-0.689187
Ms4a6b	1.13365	5.33121	5.0024	0.000787599	0.00973462	-0.690768
Gadd45g	1.99956	7.83942	4.99985	0.000790293	0.00973579	-0.694382
Chac1	2.03191	6.23916	4.9882	0.000802757	0.00983436	-0.710942
BC028528	-1.03096	6.64469	-4.98652	0.000804575	0.00985084	-0.713336
9430082L08Rik	-1.04141	5.3219	-4.98105	0.000810522	0.00988874	-0.721129
Rbm43	1.03262	6.81369	4.97598	0.00081607	0.00994022	-0.728349
Eif1a	1.8238	7.56298	4.9643	0.000829002	0.0100446	-0.744986
AI605517	-1.15019	8.9027	-4.96422	0.000829091	0.0100446	-0.745099
Fam78a	-1.24226	7.59621	-4.96365	0.000829729	0.0100465	-0.745914
Atp8b1	1.08971	5.88468	4.95962	0.00083425	0.0100778	-0.751663
Bst1	1.51079	4.29746	4.95562	0.00083876	0.0101205	-0.757367
Sparcl1	-1.8235	9.97672	-4.94154	0.000854859	0.0102545	-0.777483
Car14	-1.46775	9.27589	-4.94073	0.000855795	0.0102545	-0.778642
Procr	1.28407	6.07086	4.94032	0.000856266	0.0102545	-0.779223
Asb10	-1.95019	7.83493	-4.93197	0.000865987	0.0103293	-0.791166
Cluh	-1.12831	9.31648	-4.91374	0.000887629	0.0104972	-0.817279
Wif1	-1.59023	5.96497	-4.90131	0.000902715	0.0106213	-0.835106
Arrdc2	1.56257	4.86007	4.89037	0.000916221	0.0107377	-0.850813
Pkia	-1.10358	8.87938	-4.88766	0.000919602	0.0107652	-0.854709
Islr	-2.47232	6.80201	-4.8793	0.000930106	0.0108728	-0.866721
Sult1a1	1.45718	9.85206	4.87531	0.000935172	0.0109096	-0.872465
Fibin	-1.05599	5.78872	-4.87088	0.000940834	0.0109583	-0.878849
Marco	1.76708	4.90303	4.85546	0.000960805	0.0111046	-0.901061
Tlr3	1.89975	6.48124	4.83934	0.000982176	0.0113132	-0.924321
2310030G06Rik	1.75426	6.44136	4.83528	0.000987632	0.0113509	-0.930178
Daxx	1.21197	7.78159	4.8194	0.00100931	0.0115238	-0.953136
Slc45a3	2.03635	6.15489	4.81643	0.00101343	0.0115401	-0.957441
Tmem71	1.23119	8.16753	4.81557	0.00101463	0.0115465	-0.95869
Tppp	-1.7009	5.77236	-4.81099	0.001021	0.0115797	-0.965308
Cfd	-2.13439	7.76856	-4.80836	0.0010247	0.0115803	-0.969127
Car4	1.72299	7.97562	4.79592	0.00104233	0.0116828	-0.987156
Igfbp5	-1.16348	7.72383	-4.79383	0.00104532	0.0116932	-0.990192
Vegfc	-1.16877	6.16376	-4.77634	0.00107074	0.0118734	-1.01559
Oas2	1.00342	6.92601	4.76648	0.00108536	0.0119908	-1.02991
Trim21	1.61527	6.99531	4.76534	0.00108707	0.0119933	-1.03158
Mgp	-1.49676	10.7236	-4.75958	0.00109572	0.0120477	-1.03996
Pdlim4	-1.63361	8.07542	-4.75032	0.00110979	0.0121447	-1.05343
Rnase1	1.0954	5.28824	4.74816	0.0011131	0.0121553	-1.05658
Adam9	1.2028	9.33139	4.74089	0.00112432	0.0122492	-1.06718
Plaur	2.37029	6.22807	4.73663	0.00113095	0.0123108	-1.07339
Rxrg	-1.01694	8.02576	-4.73523	0.00113314	0.0123108	-1.07543
Map7d1	-1.11306	9.64921	-4.73201	0.00113819	0.0123466	-1.08013
Fbxo32	1.24497	9.64259	4.73193	0.00113833	0.0123466	-1.08026
Hamp	1.53921	9.5542	4.72615	0.00114745	0.0123939	-1.08869
Ces1d	-1.21244	7.87347	-4.72336	0.00115189	0.012425	-1.09277
Alad	-1.01057	7.96788	-4.7181	0.00116029	0.0124743	-1.10044
Ncf4	1.29325	5.84625	4.71217	0.00116986	0.0125486	-1.10912
Gpc1	-1.09271	10.155	-4.71019	0.00117307	0.0125728	-1.11202
Dhrs7c	-1.11161	10.2904	-4.709	0.00117499	0.0125869	-1.11375
Gng11	-1.13871	9.41839	-4.70486	0.00118175	0.0126398	-1.11981
Fam84b	-1.42058	5.76266	-4.70136	0.0011875	0.0126752	-1.12493
Chek2	-1.1961	5.15181	-4.69845	0.00119231	0.0127038	-1.1292
LOC102642487	1.08167	6.24927	4.69129	0.00120419	0.0128074	-1.13968
Myc	2.62085	6.07514	4.68368	0.00121698	0.0128776	-1.15083
Dph5	1.20257	5.81525	4.66126	0.00125552	0.0131728	-1.18375
Ckb	-1.37908	8.49158	-4.64592	0.00128263	0.0133751	-1.20631
Sdc4	1.70795	8.97027	4.64342	0.00128711	0.0134083	-1.20998
Bcr	1.03809	5.88518	4.63738	0.00129799	0.0134828	-1.21887
Angptl4	2.23858	5.22084	4.63504	0.00130224	0.0135089	-1.22232
Batf2	1.75776	6.41286	4.62659	0.0013177	0.0136248	-1.23478
Naalad2	-1.03659	5.57667	-4.62572	0.00131931	0.0136346	-1.23607
Fndc5	-1.27075	9.08323	-4.6201	0.00132969	0.0136876	-1.24434
Rnd1	2.74617	5.34246	4.61426	0.0013406	0.0137657	-1.25296
Plet1os	-1.12889	8.71301	-4.60684	0.00135459	0.0138752	-1.26392
Nov	-1.83022	6.79754	-4.5935	0.00138014	0.014047	-1.28364
Ptx3	2.19171	5.13178	4.59081	0.00138536	0.0140727	-1.28763
Dep1	-1.52203	5.92311	-4.58103	0.0014045	0.0142053	-1.3021
Grhl1	1.20384	4.67783	4.54585	0.00147571	0.0146964	-1.35428
Mx1	1.21696	4.15651	4.54463	0.00147825	0.0147076	-1.35609
Colec11	-2.16853	6.549	-4.5391	0.00148983	0.0148086	-1.36432
Msn	1.10769	9.45542	4.50693	0.00155905	0.0153211	-1.41221
Asb5	-1.1487	7.97621	-4.5036	0.00156641	0.0153644	-1.41718
Mamdc2	-1.51545	4.67677	-4.50015	0.00157408	0.0154324	-1.42233
Ddx60	2.39028	4.94812	4.48864	0.00159993	0.0155848	-1.4395
C1qtnf9	-3.0682	6.98434	-4.47928	0.00162132	0.015697	-1.45349
Gm10336	-1.44222	8.56363	-4.46608	0.00165197	0.0158598	-1.47324
Ucp1	-1.78846	4.63308	-4.45019	0.00168971	0.016118	-1.49704
Gpm6a	-1.3179	4.68767	-4.39444	0.00182957	0.017046	-1.58081
Ubd	2.57546	5.58264	4.37146	0.00189081	0.0174062	-1.61548
Arel1	1.19016	7.55345	4.34943	0.00195156	0.0177456	-1.64877
Fgf16	-1.23939	4.72142	-4.32715	0.00201513	0.0181179	-1.6825
Irf1	1.71845	8.91475	4.32401	0.00202427	0.0181651	-1.68727
H3f3b	1.16509	5.57903	4.32385	0.00202475	0.0181651	-1.68751
Sele	1.62577	4.60842	4.30971	0.00206646	0.0183794	-1.70897
Dapk2	-1.00277	5.80195	-4.29841	0.00210043	0.0186036	-1.72612
Gpr146	1.06298	6.18029	4.28861	0.00213041	0.0187812	-1.74103
Cxcl10	3.90778	6.51974	4.2835	0.00214621	0.0188805	-1.7488
Zfp445	1.10198	9.64566	4.27874	0.00216104	0.0189709	-1.75604
Upk3b	-1.61801	6.13428	-4.27795	0.00216352	0.0189846	-1.75724
Rab5c	1.16198	7.38736	4.2454	0.00226808	0.0196666	-1.80687
Ddx21	1.12531	6.69907	4.24465	0.00227053	0.0196666	-1.808
Fam101b	-1.11864	7.42324	-4.24124	0.0022818	0.0197313	-1.81321
Pilra	1.09475	4.31119	4.22741	0.00232815	0.019991	-1.83434
Rsad2	3.49709	8.13735	4.2213	0.00234895	0.0201364	-1.84369
Vtn	-1.22153	6.2876	-4.21887	0.00235726	0.0201744	-1.8474
Asb14	-1.06069	8.83398	-4.21001	0.00238789	0.0203612	-1.86097
Fen1	1.38797	7.32809	4.19444	0.00244274	0.0207216	-1.88482
Pptc7	-1.38433	10.1616	-4.18527	0.00247567	0.0208871	-1.89889
Galm	-1.27718	6.70909	-4.18197	0.00248762	0.0209625	-1.90395
Arid5a	1.35687	6.73789	4.16822	0.00253813	0.0212847	-1.92506
Junb	2.04299	7.35839	4.15635	0.00258264	0.0215452	-1.94331
Gm10309	1.62673	5.17588	4.15073	0.00260402	0.0216627	-1.95197
Slc2a4	-1.05767	10.0985	-4.14816	0.00261385	0.0217045	-1.95592
Fyb	1.00309	5.55502	4.12107	0.00271987	0.0222704	-1.99765
Sema7a	1.03646	6.17561	4.11	0.00276453	0.0224945	-2.01474
Lgals8	1.14264	7.84238	4.09978	0.00280642	0.0227837	-2.03052
Ppp1r14a	-1.26837	5.83578	-4.09698	0.00281804	0.0228317	-2.03485
Magix	-1.22708	5.79682	-4.08884	0.00285204	0.0230686	-2.04743
Cmpk2	1.61525	6.30001	4.08616	0.00286335	0.0231179	-2.05159
Cbr2	-2.34507	8.15558	-4.07765	0.00289953	0.0233104	-2.06475
Sgms1	1.14066	7.79464	4.07401	0.00291517	0.0233976	-2.07039
Nmrk2	-1.34329	7.06006	-4.07382	0.00291599	0.0233976	-2.07069
Fam195a	-1.26522	10.0781	-4.07201	0.0029238	0.0234318	-2.07349
Mid1ip1	1.25532	10.5622	4.07148	0.00292608	0.0234318	-2.07431
Tbk1	1.33356	7.93359	4.07022	0.00293151	0.0234499	-2.07626
Rcan1	2.43704	9.36714	4.06733	0.00294405	0.023505	-2.08073
C730049O14Rik	1.4861	7.63561	4.05258	0.00300898	0.0238677	-2.1036
Mtmr14	1.17577	7.45396	4.05099	0.00301608	0.0239058	-2.10607
Pltp	-1.6868	8.24643	-4.04482	0.00304376	0.0240702	-2.11565
Sphk1	2.44533	5.47386	4.03552	0.00308599	0.024321	-2.13009
Fem1b	1.21918	7.11698	4.03399	0.00309296	0.0243238	-2.13245
Ly6e	1.17045	8.97921	4.01363	0.00318783	0.0248427	-2.16411
Errfi1	1.24029	8.2538	4.0077	0.00321603	0.0249975	-2.17334
Ccdc80	-1.01315	8.69176	-4.00056	0.00325035	0.0251471	-2.18445
Rell1	1.31397	7.53009	4.00038	0.00325122	0.0251471	-2.18473
Mctp2	1.16054	4.06744	3.99936	0.00325615	0.0251504	-2.18632
Paqr4	-1.01572	6.89248	-3.98922	0.00330568	0.0253516	-2.20213
Rbp1	-1.63318	7.48933	-3.96578	0.00342317	0.0260321	-2.2387
Irf8	1.7635	6.17629	3.96446	0.00342991	0.0260434	-2.24075
Ptplad2	-1.08096	6.66296	-3.95506	0.00347835	0.0262789	-2.25544
Cd207	-1.03302	4.44814	-3.95233	0.00349259	0.0263673	-2.25971
Plscr1	1.79214	6.4549	3.95085	0.00350033	0.026397	-2.26203
2700081O15Rik	-1.26652	6.31691	-3.95045	0.00350243	0.026397	-2.26265
Podxl	-1.08733	7.78491	-3.93322	0.00359383	0.0268936	-2.28961
Olr1	1.21919	3.63414	3.90475	0.00375045	0.0277468	-2.33423
Fabp7	-1.09433	4.18957	-3.89556	0.00380249	0.0280159	-2.34863
Snx10	1.76556	6.10757	3.88862	0.00384237	0.0282199	-2.35954
Ppp1r3c	-1.47131	9.29591	-3.88836	0.00384386	0.0282208	-2.35995
E230013L22Rik	2.19859	7.04375	3.88394	0.00386946	0.0283788	-2.36689
Gpbp1l1	-1.08572	6.76146	-3.87597	0.00391612	0.0286049	-2.37941
Apoe	-1.919	9.48532	-3.87586	0.00391678	0.0286049	-2.37959
Pdk4	1.8573	12.4274	3.86928	0.00395574	0.0287784	-2.38993
Nts	1.03251	5.32737	3.86741	0.00396687	0.0288156	-2.39287
Exoc3l4	1.39112	6.19124	3.86362	0.00398958	0.0289234	-2.39884
Smco1	-1.39156	6.55426	-3.83617	0.00415814	0.0298686	-2.44206
Fah	1.03307	9.65587	3.83394	0.00417218	0.0299127	-2.44558
Il6	4.05569	5.23039	3.81861	0.00426995	0.0304284	-2.46977
P2ry2	1.19549	6.98796	3.80762	0.00434156	0.0308203	-2.48713
C78692	-1.05323	7.25067	-3.79847	0.00440211	0.031144	-2.50158
Dnajb14	-1.39088	7.07342	-3.79427	0.0044302	0.0312741	-2.50822
Fmnl2	1.63414	8.07908	3.79421	0.00443058	0.0312741	-2.50831
Rnf125	1.35242	8.03536	3.77346	0.0045722	0.0319834	-2.54114
Myocd	-1.13841	8.36237	-3.75621	0.00469362	0.0324587	-2.56847
Rfx5	1.17071	6.61552	3.75411	0.00470866	0.0325493	-2.5718
Trim12c	1.11498	5.70038	3.74427	0.00477964	0.0327475	-2.5874
Ptprr	-1.23248	5.09843	-3.71676	0.00498422	0.0338141	-2.63108
Rrad	1.36407	11.003	3.70091	0.00510628	0.0343622	-2.65628
Asns	1.369	5.31858	3.69865	0.00512397	0.0344478	-2.65988
Ampd3	1.87009	8.48111	3.66654	0.00538194	0.0357355	-2.71102
Reg3a	1.26321	4.1568	3.66331	0.00540867	0.0358637	-2.71617
Zfp36	1.73979	8.02225	3.66039	0.0054329	0.0360014	-2.72082
Tmem252	1.48115	6.27335	3.65677	0.00546316	0.0361214	-2.7266
Csf3	3.80668	6.24155	3.65438	0.00548321	0.0361989	-2.73041
1700023H06Rik	1.14356	4.98926	3.6523	0.00550075	0.0362725	-2.73373
Pnkd	-1.00672	8.20179	-3.64277	0.00558176	0.0366379	-2.74894
Tifa	1.21206	5.82309	3.64216	0.00558699	0.0366491	-2.74992
Kcnk3	-1.26774	7.11036	-3.63917	0.00561267	0.036695	-2.75469
Cxcl3	1.60624	3.33361	3.63226	0.00567258	0.0369769	-2.76573
Nampt	1.32739	9.17906	3.6282	0.00570803	0.0371272	-2.77221
D18Ertd232e	1.45277	5.58033	3.61089	0.00586206	0.0377983	-2.79988
Frmd5	-1.4537	8.1937	-3.57895	0.00615782	0.0391954	-2.85102
Rab20	1.33583	7.25892	3.57174	0.00622666	0.0394887	-2.86257
Irak2	1.09045	6.31598	3.56247	0.00631646	0.0399122	-2.87743
Fam107a	1.26925	6.36274	3.55123	0.00642716	0.0404154	-2.89547
1110038F14Rik	1.25285	7.47705	3.55041	0.00643529	0.0404338	-2.89678
AI256396	-1.10675	4.74405	-3.5422	0.00651761	0.040787	-2.90997
Spsb4	-1.11209	5.14128	-3.52942	0.00664783	0.0413903	-2.93049
Kcne4	1.21487	6.74188	3.52712	0.00667153	0.0414883	-2.93418
Zfp799	-1.11093	6.2775	-3.51769	0.0067698	0.0418866	-2.94935
Fbp1	1.9539	5.0863	3.50962	0.006855	0.042238	-2.96231
Asb2	-2.32385	10.2519	-3.50924	0.00685903	0.0422503	-2.96292
Acsm5	1.24028	4.46132	3.50244	0.00693182	0.0426104	-2.97387
Rgcc	1.29358	9.01844	3.5014	0.00694309	0.0426168	-2.97555
C330006D17Rik	1.30211	7.69064	3.49616	0.00699976	0.0428635	-2.98397
Mrm1	-1.31228	6.58118	-3.4907	0.00705942	0.0430443	-2.99277
Vsig4	-1.72786	5.5897	-3.45649	0.00744528	0.0446974	-3.04789
Gdap10	1.098	8.72093	3.45045	0.00751564	0.0450141	-3.05763
Asb4	2.17081	5.72689	3.44298	0.00760374	0.0453545	-3.06969
Pdlim2	-1.57177	5.87354	-3.43042	0.00775419	0.0459817	-3.08996
Rasd1	1.38793	5.55967	3.42767	0.00778747	0.0461527	-3.09439
Hilpda	1.01438	5.86824	3.41132	0.00798894	0.0471053	-3.12081
