# Supplementary material for: Bioinformatics analysis of neutrophil-associated hub genes and ceRNA network construction in septic cardiomyopathy
Source: Aging (Albany NY). 2024 Aug 30;16(19):12833–49. doi: 10.18632/aging.206092 (PMC11501391; doi:10.18632/aging.206092)
Supplement: Supplementary Table 2 [file aging-16-206092-s003.xlsx]

## Sheet: ImmuCellAI Result of GSE79962
Supplementary Table 2. The proportions of 24 types of immune cells in GSE79962.
	DC	Bcell	Monocyte	Macrophage	NK	Neutrophil	CD4_T	CD8_T	NKT	Gamma_delta	CD4_naive	Tr1	nTreg	iTreg	Th1	Th2	Th17	Tfh	CD8_naive	Cytotoxic	Exhausted	MAIT	Central_memory	Effector_memory	InfiltrationScore
GSM2109150	0.069	0.155	0	0.082	0.075	0.116	0.129	0.151	0.084	0.14	0	0.002	0.001	0.003	0.006	0.015	0.004	0	0.001	0.005	0.003	0.003	0.002	0.004	0.821
GSM2109151	0.145	0.081	0.038	0.162	0.038	0.069	0.038	0.224	0.053	0.152	0	0.001	0	0	0.002	0.004	0.002	0	0.004	0.005	0	0.012	0.003	0.002	0.772
GSM2109152	0.191	0.024	0.091	0.163	0.03	0.056	0.127	0.149	0.074	0.095	0	0.003	0	0.002	0.002	0.016	0.006	0.001	0.001	0.003	0.004	0.008	0.002	0	0.769
GSM2109153	0.096	0.146	0.078	0.11	0.056	0.092	0.09	0.18	0.026	0.126	0.001	0.002	0	0.001	0.001	0.01	0.003	0.002	0.002	0.01	0.006	0	0.004	0	0.764
GSM2109154	0.154	0.115	0.038	0.111	0.042	0.095	0.065	0.214	0.071	0.095	0	0.002	0	0.001	0.001	0.01	0	0	0.004	0.009	0.006	0.007	0.002	0	0.773
GSM2109155	0.113	0.162	0.034	0.128	0.036	0.046	0.04	0.202	0.116	0.122	0	0.001	0	0	0	0.004	0.002	0	0.001	0.011	0.001	0.009	0.001	0.001	0.801
GSM2109156	0.145	0.149	0.032	0.091	0.048	0	0.09	0.202	0.099	0.145	0.001	0.001	0.001	0.001	0.002	0.011	0	0.002	0.003	0.011	0.005	0.006	0.002	0	0.802
GSM2109157	0.173	0.131	0.056	0.129	0.036	0.069	0.054	0.163	0.075	0.115	0.001	0.001	0.001	0.001	0.001	0.006	0.002	0	0.003	0.007	0.005	0.002	0.003	0.001	0.772
GSM2109158	0.124	0.126	0.056	0.073	0.083	0.064	0.071	0.224	0.077	0.102	0.001	0.001	0.001	0.002	0.001	0.005	0.003	0.003	0.009	0.007	0.007	0.001	0.004	0	0.813
GSM2109159	0.118	0.153	0	0.112	0.052	0.116	0.112	0.209	0.093	0.034	0	0.002	0	0.001	0.003	0.009	0.003	0.003	0.009	0.01	0.005	0.01	0.001	0	0.818
GSM2109160	0.095	0.163	0.091	0.085	0.11	0.108	0.112	0.172	0.064	0	0	0.003	0.001	0.003	0	0.011	0.001	0.003	0.011	0.007	0.003	0.008	0	0	0.807
GSM2109161	0.087	0.157	0.021	0.075	0.125	0.174	0.057	0.099	0.07	0.134	0	0	0.001	0.002	0.003	0.006	0.002	0.001	0.001	0.004	0	0.005	0	0	0.877
GSM2109162	0	0.097	0.159	0.133	0.083	0.188	0.037	0.199	0.058	0.046	0	0.001	0.001	0.001	0.001	0.003	0.002	0.001	0.005	0.008	0	0.007	0.002	0	0.791
GSM2109163	0.114	0.135	0.072	0.025	0.091	0.181	0.124	0.175	0.055	0.029	0.002	0.004	0	0.001	0	0.015	0.002	0.001	0.003	0.003	0.005	0.009	0.009	0	0.804
GSM2109164	0.078	0.137	0.083	0.032	0.104	0.184	0.114	0.175	0.055	0.038	0.001	0.003	0.001	0.004	0.002	0.008	0.002	0.004	0.003	0.008	0	0.008	0.005	0.001	0.807
GSM2109165	0.092	0.059	0.041	0.096	0.101	0.303	0.055	0.153	0.066	0.033	0	0.001	0.001	0	0.001	0.003	0.002	0.002	0.003	0.009	0.005	0.009	0.001	0	0.829
GSM2109166	0.095	0.05	0.062	0.102	0.066	0.236	0.076	0.123	0.125	0.062	0.001	0.002	0.001	0.001	0.001	0.008	0.002	0.001	0.001	0.005	0.003	0.005	0.002	0.003	0.88
GSM2109167	0.041	0.139	0.083	0.028	0.09	0.135	0.085	0.186	0.098	0.115	0.001	0.001	0.002	0.001	0.003	0.008	0.004	0.001	0.002	0.002	0.001	0.011	0.002	0.002	0.815
GSM2109168	0.122	0.108	0.063	0.098	0.078	0.173	0.082	0.161	0.061	0.054	0.002	0.001	0.001	0.001	0.002	0.006	0.001	0.003	0.002	0.004	0.004	0.004	0.009	0.002	0.825
GSM2109169	0.075	0.136	0.075	0.038	0.066	0.112	0.09	0.172	0.071	0.165	0.001	0.001	0.001	0.001	0.002	0.009	0.003	0.002	0.003	0.01	0	0.009	0.001	0.001	0.836
GSM2109170	0.052	0.077	0.037	0.206	0.043	0.335	0.062	0.133	0	0.054	0	0.001	0.001	0	0	0.005	0.003	0.002	0.009	0.002	0.001	0.006	0.001	0	0.817
GSM2109171	0.083	0.14	0.027	0.163	0.091	0.342	0.008	0.091	0.011	0.044	0	0	0	0	0	0.001	0	0	0.003	0.004	0.001	0.005	0.001	0	0.805
GSM2109172	0.163	0	0.056	0.117	0.046	0.286	0.146	0	0.015	0.17	0.006	0.002	0.003	0.002	0.008	0.001	0.008	0.008	0	0	0	0	0.003	0.001	0.9
GSM2109173	0.079	0.105	0.098	0.114	0.028	0.118	0.024	0.18	0.157	0.098	0	0	0	0	0.001	0.002	0.001	0.001	0	0.003	0	0.01	0.001	0.005	0.832
GSM2109174	0.103	0.111	0.027	0.071	0.037	0.135	0.037	0.159	0.225	0.094	0	0	0.001	0.001	0	0.003	0.001	0.001	0	0.005	0.002	0.01	0.003	0.002	0.858
GSM2109175	0.105	0.146	0.079	0	0.11	0.108	0.055	0.233	0.057	0.107	0	0	0	0	0.002	0.005	0.002	0	0.005	0.006	0.004	0.019	0.005	0.003	0.773
GSM2109176	0.168	0.115	0.053	0.113	0.041	0.234	0.035	0.129	0.027	0.086	0	0.001	0.001	0	0.001	0.002	0.004	0	0.004	0.003	0.001	0.005	0.003	0.001	0.788
GSM2109177	0.066	0.023	0.087	0.139	0.03	0.27	0.037	0.149	0.123	0.076	0	0	0.001	0.001	0.001	0.003	0.002	0.001	0.002	0.005	0	0.009	0.002	0	0.863
GSM2109178	0.093	0.046	0.098	0.132	0	0.199	0.067	0.104	0.104	0.158	0	0.001	0.001	0.001	0.002	0.006	0.003	0	0	0.005	0.001	0.006	0.003	0.002	0.824
GSM2109179	0.119	0.046	0.073	0.19	0.068	0.163	0	0.13	0.117	0.095	0	0	0	0	0	0	0	0	0.005	0.005	0	0.007	0.006	0.005	0.839
GSM2109180	0.076	0.12	0.016	0.076	0.058	0.173	0.089	0.193	0.089	0.109	0.001	0.001	0.001	0.001	0.002	0.007	0.004	0.001	0.005	0.007	0.006	0.007	0.004	0.002	0.843
