# Supplementary material for: Bioinformatics analysis of neutrophil-associated hub genes and ceRNA network construction in septic cardiomyopathy
Source: Aging (Albany NY). 2024 Aug 30;16(19):12833–49. doi: 10.18632/aging.206092 (PMC11501391; doi:10.18632/aging.206092)
Supplement: Supplementary Table 3 [file aging-16-206092-s004.xlsx]

## Sheet: module_linen
Supplementary Table 3. The neutrophil-related module genes in WGCNA.
ABI3BP
ABLIM2
ACAP2
ACKR1
ACSL3
ACSS1
ACTA2
ACTA2-AS1
ADAMTS5
ADAP2
ADD3
ADGRF5
ADNP
ADPRH
AGPAT2
AIF1
AKT3
AKTIP
ALDH1A1
ALOX5AP
ANKRD22
ANKRD28
ANP32A-IT1
ANXA1
AOAH
AP1S2
APBB1IP
APOBEC3B
AQP9
ARFGEF3
ARG1
ARG2
ARHGAP15
ARHGAP18
ARHGDIB
ARHGEF3
ARL13B
ARL4C
ARRB2
ARSA
ARSK
ATE1
ATG3
ATP2A3
ATP2B1
ATP6V1E1
ATRNL1
B4GALT4
B9D1
BASP1
BCL11A
BCL2A1
BIN2
BLNK
BRD7P3
BST1
BTN2A1
BTN3A1
C11orf49
C15orf57
C16orf95
C19orf54
C1orf162
C1QA
C1QB
C1QC
C1R
C1S
C2
C21orf33
C21orf59
C3
C3AR1
C5AR1
CA1
CACNB1
CADM1
CADPS2
CALCOCO2
CALD1
CAMK2B
CAMKK2
CARD6
CCDC130
CCDC181
CCDC68
CCDC84
CCDC88C
CCL18
CCND3
CCNH
CD109
CD14
CD163
CD177
CD180
CD209
CD2BP2
CD300LG
CD320
CD34
CD37
CD4
CD48
CD52
CD53
CD58
CD68
CD74
CD82
CD84
CDK14
CDNF
CEACAM6
CEACAM8
CECR1
CENPBD1P1
CEP19
CERS5
CHGB
CHL1
CHML
CHMP2B
CHSY1
CISD1
CLEC7A
CLN3
CLN5
CMTM3
CNKSR3
CNPY3
CNTLN
CNTNAP3B
COIL
COL6A1
CORIN
COTL1
COX4I2
CPM
CPPED1
CR1
CRIP1
CRLF1
CSF1R
CSF3R
CSK
CSNK2A3
CSRNP2
CSTA
CSTF1
CTSB
CTSH
CTSS
CXCL12
CXCL6
CXCR4
CYBB
CYLD
CYTH4
CYTIP
CYYR1
DAB2
DAP
DAPK1
DARS2
DCLK1
DDB1
DDT
DDX19A
DDX24
DDX42
DEFA1B
DERL3
DHRS11
DHRS3
DHX57
DIABLO
DIRC2
DIS3
DISP1
DKFZp779M0652
DLEU2L
DMAP1
DMXL2
DNAJB9
DNMBP
DOCK11
DOCK2
DOCK8
DPM1
DPYD
DTNA
DUSP14
DXO
E2F6
EBF3
ECHDC1
EDIL3
EDNRA
EFHD2
EGLN1
EIF2AK4
EIF5B
ELANE
ELL
EMC2
EMC4
EMC8
EMCN
EMP3
ENG
ENTPD1
ENTPD4
EPB41
EPB41L2
EPB41L3
EPC1
EPRS
ERBB2
ERICH5
ERO1B
ETHE1
EVI2A
EVI2B
F13A1
F5
FABP4
FABP5P3
FAM102B
FAM168A
FAM20A
FAM212B
FAM222B
FAM231B
FAM26E
FAM65B
FAM86C2P
FBN2
FBXO31
FBXO4
FBXO9
FBXW2
FCER1G
FCGR1CP
FCGR2A
FCGR2C
FCGR3A
FCGR3B
FCHO2
FGD5
FGR
FHL5
FKBP15
FKTN
FLI1
FLJ36840
FOLR2
FPR1
FPR3
FUBP3
FUT8
FXYD5
FYB
GABRE
GALNT7
GCA
GCNT1
GGH
GGT7
GGTA1P
GIMAP4
GIMAP7
GJA4
GJA5
GLA
GLIPR2
GLMP
GLTPD2
GMFG
GNA15
GNAQ
GNG11
GNG2
GNRHR2
GNS
GOLGA4
GPATCH2L
GPR141
GPR34
GPX8
GRK5
GTF3C4
GUCY1B3
GULP1
GUSB
HAUS1
HCK
HCLS1
HCST
HEXB
HGSNAT
HIST1H1D
HIST1H2BG
HIST1H4C
HLA-C
HLA-DPA1
HLA-DPB1
HLA-DRA
HLA-H
HLX
HMOX1
HNMT
HNRNPA0
HP
HPRT1
HSPA1L
HSPA7
HSPBAP1
HSPE1-MOB4
HTATSF1P2
HTRA3
ID2
IDH2
IFI30
IFITM1
IFT43
IGF2BP2-AS1
IGFBP6
IGSF6
IKZF4
IL10RA
IL10RB
IL17RD
IL18
IL1R2
IL6
ILDR2
INPP4A
INTS8
IQCG
IQGAP1
IQGAP2
IRAK4
IRF2BPL
ISLR
ITGA11
ITGA6
ITGAM
ITGB2
ITM2A
ITPRIP
JAK2
JAML
JPH2
KCNB1
KCNJ15
KDR
KIAA0753
KIAA1191
KIAA1958
KIF1BP
KLF10
KLRD1
KRCC1
KYNU
LAIR1
LAPTM5
LASP1
LCE1D
LCE3B
LCP1
LCP2
LGALS3BP
LGALS9
LILRA2
LILRB2
LILRB3
LILRB4
LILRB5
LIN7A
LIPA
LIPN
LOC100128775
LOC100134868
LOC100505549
LOC100996333
LOC100996732
LOC101927181
LOC441081
LPAR3
LPAR6
LPCAT2
LPCAT3
LPIN2
LRMP
LRRK2
LSM1
LST1
LTA4H
LYN
LYRM1
LYSMD2
LYST
LYVE1
LYZ
MAD2L2
MAFB
MAP3K1
MAP3K13
MAP4K2
MARVELD1
MBD4
MBOAT1
MBTD1
MED14
MED23
MEOX2
MERTK
METTL10
METTL7B
METTL8
MFAP5
MGAM
MICAL1
MIF4GD
MIIP
MIR1-1HG
MMACHC
MNDA
MOP-1
MOV10
MPEG1
MPP3
MRC1
MRPS26
MRPS6
MS4A14
MS4A4A
MS4A6A
MSL2
MSR1
MST1
MTFMT
MTG1
MTHFD2L
MTHFR
MTM1
MTSS1
MXD1
MYLIP
MYO1F
MYO5A
NAA16
NAB1
NAF1
NAGA
NAP1L1
NAP1L3
NAPA
NARFL
NCF1C
NCF2
NCF4
NCKAP1L
NDUFAF7
NDUFS5
NECAB3
NECTIN3
NEU3
NFIL3
NHLRC2
NPB
NQO1
NR1H3
NR5A2
NRBF2
NREP
NRN1
NSDHL
NSRP1
NSUN2
NT5C3A
NTMT1
NUCB2
NUDCD2
NUDT16L1
NUPL2
NYNRIN
OAS1
OGFRL1
OR8G1
OS9
OXCT2P1
P2RX4
P2RY13
PACRGL
PAMR1
PARGP1
PARP4
PER2
PEX1
PGD
PGLS
PHC3
PHTF1
PHYHD1
PI3
PIGL
PIGZ
PIK3AP1
PIK3R6
PILRA
PIM3
PKDCC
PKHD1L1
PKIG
PKM
PLA2G2A
PLAA
PLBD1
PLCB2
PLEK
PLEKHA3
PLET1
PLRG1
PLTP
PLXNC1
PLXND1
PM20D1
PMS2P1
PODXL
POLD3
POLR1E
PPM1B
PQLC1
PRCP
PRELID2
PRKCB
PRLH
PRSS45
PSEN2
PSMA1
PSMC6
PSMD8
PTGDR
PTK2B
PTPN11
PTPN18
PTPN6
PTPRB
PTPRC
PTPRJ
PTRF
PUDP
PUSL1
PWAR6
PXDNL
PYGL
QRFP
QTRT1
RAB11FIP2
RAB11FIP3
RAB20
RABL2A
RAC2
RAD18
RAPGEF4
RASSF2
RASSF3
RBM26
RBM47
RBM8A
RBPMS2
RECK
RELL1
RGL1
RHBDD2
RHOBTB3
RHOG
RING1
RNASE2
RNASE6
RNASEH1
RNASET2
RNF113A
RNF125
RNF139
RNF144B
RNF157
RNH1
RNMT
RPL23AP64
RPS26P11
RRM2
RRP15
RRP36
RTBDN
RTCA
RUFY3
RUNDC1
RWDD2A
S100A10
S100A12
S100A4
S100A8
S100A9
SASH1
SBDS
SCD
SCIMP
SCO1
SDCBP
SDE2
SEC63
SECTM1
SELL
SELPLG
SEPSECS
SERPINA1
SERPIND1
SETDB2
SFXN2
SFXN3
SH2D3C
SH3BGRL
SH3BP2
SH3KBP1
SHQ1
SIGIRR
SIGLEC16
SIGLEC9
SIRT3
SKAP2
SLA
SLAMF8
SLC11A1
SLC15A3
SLC16A10
SLC22A4
SLC22A5
SLC25A16
SLC25A37
SLC30A1
SLC30A5
SLC35B3
SLC44A1
SLC5A3
SLC9A3R2
SLC9A9
SLCO2B1
SLCO3A1
SLFN11
SLPI
SMAP2
SMC6
SMPD1
SMS
SNAP47
SNORA27
SNORA51
SNORA71D
SNORA80A
SNORD116-29
SNORD45A
SNORD54
SNRNP48
SNRPA1
SNRPG
SNX10
SNX6
SOCS2
SOCS4
SORL1
SOX17
SPAG1
SPI1
SPIRE1
SPOPL
SPP1
SRA1
SREBF1
SRF
SRP54
ST6GALNAC1
ST8SIA4
ST8SIA6
STAB1
STAM
STK19
STK40
SUSD4
TAF13
TARS
TBC1D25
TBC1D2B
TBXAS1
TCEAL2
TCHP
TCN2
TECRL
TEK
TEX261
TFB1M
TFEC
TGFB1
TGFBI
THAP1
THAP5
THBD
THEMIS2
TIGD7
TIMM17A
TIMP2
TIPARP
TLR1
TLR2
TLR3
TLR4
TLR6
TM4SF18
TMEM154
TMEM167B
TMEM168
TMEM221
TMEM37
TMEM5
TMEM88
TMIGD3
TMOD2
TMOD3
TMSB4XP2
TMSB4XP6
TMSB4Y
TNFSF13B
TNS3
TP53BP1
TPST2
TRIM16L
TRIM25
TRMT11
TRNAU1AP
TSC22D1
TSFM
TSHZ3
TSPAN14
TSPYL2
TSTA3
TUBA3D
TXNDC11
TXNL4A
TYROBP
U2AF1L4
UBB
UBBP4
UBE2MP1
UBE2V2
UBE3B
UCN2
UGGT2
UHRF2
URGCP-MRPS24
USP53
VAMP4
VAMP8
VAV3
VIM
VN1R1
VNN2
VPS37B
VSIG4
WARS2
WDPCP
WDYHV1
WFS1
WIPI1
WNT2B
WNT9A
XPNPEP2
YWHAQP8
ZBED8
ZBTB10
ZBTB21
ZC2HC1C
ZEB2
ZIM2
ZMYM2
ZNF189
ZNF221
ZNF227
ZNF304
ZNF346
ZNF354B
ZNF366
ZNF470
ZNF503-AS2
ZNF521
ZNF547
ZNF623
ZNF639
ZNF747
ZNF773
ZNF805
ZNHIT2
ZXDB
