# Supplementary material for: Bioinformatics analysis of neutrophil-associated hub genes and ceRNA network construction in septic cardiomyopathy
Source: Aging (Albany NY). 2024 Aug 30;16(19):12833–49. doi: 10.18632/aging.206092 (PMC11501391; doi:10.18632/aging.206092)
Supplement: Supplementary Table 4 [file aging-16-206092-s005.xlsx]

## Sheet: StarBase
Supplementary Table 4. The miRNA prediction results for MRC1.
#please cite:
#Zhou KR, Liu S, Li B, Liu SR, Zheng WJ, Cai L, et al. An encyclopedia of RNA interactomes in ENCORI.
#Li JH, et al.starBase v2.0: decoding miRNA-ceRNA, miRNA-ncRNA and protein-RNA interaction networks from large-scale CLIP-Seq data , Nucleic Acids Res. 2014 Jan;42:D92-7.
#Please note that the genomic locous are in 1-base (not bed format)
miRNAid	miRNAname	geneID	geneName	geneType	chromosome	narrowStart	narrowEnd	broadStart	broadEnd	strand	clipExpNum	degraExpNum	RBP	PITA	RNA22	miRmap	microT	miRanda	PicTar	TargetScan	TDMDScore	phyloP	pancancerNum
MIMAT0000078	hsa-miR-23a-3p	ENSG00000260314	MRC1	protein_coding	chr10	17866604	17866632	17866604	17866632	+	0	0	NA	0	0	0	1	0	0	0	1.2694	4.342	0
MIMAT0000078	hsa-miR-23a-3p	ENSG00000260314	MRC1	protein_coding	chr10	17910534	17910540	17910513	17910541	+	1	0	AGO1	0	0	1	1	1	0	0	1.4297	0.673	0
MIMAT0000078	hsa-miR-23a-3p	ENSG00000260314	MRC1	protein_coding	chr10	17911078	17911083	17911056	17911084	+	0	0	NA	0	0	1	1	1	1	0	0.9942	1.624	0
MIMAT0000078	hsa-miR-23a-3p	ENSG00000260314	MRC1	protein_coding	chr10	17911123	17911129	17911102	17911130	+	0	0	NA	0	0	1	1	1	1	1	1.3949	1.811	0
MIMAT0000418	hsa-miR-23b-3p	ENSG00000260314	MRC1	protein_coding	chr10	17866604	17866632	17866604	17866632	+	0	0	NA	0	0	0	1	0	0	0	1.1544	4.342	0
MIMAT0000418	hsa-miR-23b-3p	ENSG00000260314	MRC1	protein_coding	chr10	17910534	17910540	17910513	17910541	+	1	0	AGO1	0	0	1	1	1	0	0	1.1568	0.673	0
MIMAT0000418	hsa-miR-23b-3p	ENSG00000260314	MRC1	protein_coding	chr10	17911078	17911083	17911056	17911084	+	0	0	NA	0	0	1	1	1	1	0	0.899	1.624	0
MIMAT0000418	hsa-miR-23b-3p	ENSG00000260314	MRC1	protein_coding	chr10	17911123	17911129	17911102	17911130	+	0	0	NA	0	0	1	1	1	1	1	1.1626	1.811	0
MIMAT0000421	hsa-miR-122-5p	ENSG00000260314	MRC1	protein_coding	chr10	17910936	17910941	17910914	17910942	+	3	0	AGO1	0	0	1	1	1	0	0	0.52	-0.189	0
MIMAT0000456	hsa-miR-186-5p	ENSG00000260314	MRC1	protein_coding	chr10	17845394	17845422	17845394	17845422	+	0	0	NA	0	0	0	1	0	0	0	0.3503	2.343	0
MIMAT0000456	hsa-miR-186-5p	ENSG00000260314	MRC1	protein_coding	chr10	17910531	17910552	17910524	17910552	+	1	0	AGO1	0	0	0	1	1	0	0	0.2406	0.377	0
MIMAT0000456	hsa-miR-186-5p	ENSG00000260314	MRC1	protein_coding	chr10	17911019	17911047	17911019	17911047	+	0	0	NA	0	0	0	1	0	0	0	0.8037	0.268	0
MIMAT0000772	hsa-miR-345-5p	ENSG00000260314	MRC1	protein_coding	chr10	17910867	17910872	17910867	17910872	+	0	0	NA	0	0	1	0	0	0	0	0.4334	-0.443	0
MIMAT0000772	hsa-miR-345-5p	ENSG00000260314	MRC1	protein_coding	chr10	17910904	17910909	17910904	17910909	+	1	0	AGO1	0	0	1	0	0	0	0	0.6563	-0.709	0
MIMAT0004593	hsa-miR-130a-5p	ENSG00000260314	MRC1	protein_coding	chr10	17866604	17866632	17866604	17866632	+	0	0	NA	0	0	0	1	0	0	0	0.9656	4.342	0
MIMAT0004593	hsa-miR-130a-5p	ENSG00000260314	MRC1	protein_coding	chr10	17910534	17910540	17910513	17910541	+	1	0	AGO1	0	0	1	1	0	0	0	0.9568	0.673	0
MIMAT0004593	hsa-miR-130a-5p	ENSG00000260314	MRC1	protein_coding	chr10	17911078	17911083	17911056	17911084	+	0	0	NA	0	0	1	1	0	0	0	1.123	1.624	0
MIMAT0004593	hsa-miR-130a-5p	ENSG00000260314	MRC1	protein_coding	chr10	17911123	17911129	17911102	17911130	+	0	0	NA	0	0	1	1	0	1	1	0.8969	1.811	0
MIMAT0004797	hsa-miR-582-3p	ENSG00000260314	MRC1	protein_coding	chr10	17910921	17910927	17910900	17910928	+	1	0	AGO1	0	0	1	1	0	0	0	0.9616	-0.07	0
MIMAT0018000	hsa-miR-23c	ENSG00000260314	MRC1	protein_coding	chr10	17866604	17866632	17866604	17866632	+	0	0	NA	0	0	0	1	0	0	0	0.9091	4.342	0
MIMAT0018000	hsa-miR-23c	ENSG00000260314	MRC1	protein_coding	chr10	17910534	17910540	17910513	17910541	+	1	0	AGO1	0	0	1	1	0	0	0	0.8703	0.673	0
MIMAT0018000	hsa-miR-23c	ENSG00000260314	MRC1	protein_coding	chr10	17911078	17911083	17911056	17911084	+	0	0	NA	0	0	1	1	0	0	0	0.9678	1.624	0
MIMAT0018000	hsa-miR-23c	ENSG00000260314	MRC1	protein_coding	chr10	17911123	17911129	17911102	17911130	+	0	0	NA	0	0	1	1	0	1	1	1.0023	1.811	0
MIMAT0022300	hsa-miR-5590-3p	ENSG00000260314	MRC1	protein_coding	chr10	17849717	17849745	17849717	17849745	+	0	0	NA	0	0	0	1	0	0	0	0.8026	3.263	0
MIMAT0022300	hsa-miR-5590-3p	ENSG00000260314	MRC1	protein_coding	chr10	17910932	17910960	17910932	17910960	+	1	0	AGO1	0	0	0	1	0	0	0	1.1022	0.11	0

## Sheet: miRDB
Gene 4360 is predicted to be targeted by 67 miRNAs in miRDB.
Target Detail	Target Rank	Target Score	miRNA Name	Gene Symbol	Gene Description
Details	1	99	hsa-miR-23a-3p	MRC1	mannose receptor C-type 1
Details	2	99	hsa-miR-23b-3p	MRC1	mannose receptor C-type 1
Details	3	99	hsa-miR-23c	MRC1	mannose receptor C-type 1
Details	4	96	hsa-miR-205-3p	MRC1	mannose receptor C-type 1
Details	5	90	hsa-miR-511-5p	MRC1	mannose receptor C-type 1
Details	6	90	hsa-miR-34a-3p	MRC1	mannose receptor C-type 1
Details	7	89	hsa-miR-33a-3p	MRC1	mannose receptor C-type 1
Details	8	87	hsa-miR-582-5p	MRC1	mannose receptor C-type 1
Details	9	87	hsa-miR-935	MRC1	mannose receptor C-type 1
Details	10	86	hsa-miR-4668-3p	MRC1	mannose receptor C-type 1
Details	11	86	hsa-miR-5006-5p	MRC1	mannose receptor C-type 1
Details	12	86	hsa-miR-7158-3p	MRC1	mannose receptor C-type 1
Details	13	85	hsa-miR-3915	MRC1	mannose receptor C-type 1
Details	14	84	hsa-miR-513c-3p	MRC1	mannose receptor C-type 1
Details	15	84	hsa-miR-513a-3p	MRC1	mannose receptor C-type 1
Details	16	82	hsa-miR-582-3p	MRC1	mannose receptor C-type 1
Details	17	81	hsa-miR-3606-3p	MRC1	mannose receptor C-type 1
Details	18	81	hsa-miR-4799-5p	MRC1	mannose receptor C-type 1
Details	19	80	hsa-miR-4755-3p	MRC1	mannose receptor C-type 1
Details	20	77	hsa-miR-3168	MRC1	mannose receptor C-type 1
Details	21	77	hsa-miR-4448	MRC1	mannose receptor C-type 1
Details	22	76	hsa-miR-4705	MRC1	mannose receptor C-type 1
Details	23	76	hsa-miR-625-5p	MRC1	mannose receptor C-type 1
Details	24	73	hsa-miR-1275	MRC1	mannose receptor C-type 1
Details	25	71	hsa-miR-3182	MRC1	mannose receptor C-type 1
Details	26	71	hsa-miR-4700-3p	MRC1	mannose receptor C-type 1
Details	27	69	hsa-miR-5589-3p	MRC1	mannose receptor C-type 1
Details	28	67	hsa-miR-3671	MRC1	mannose receptor C-type 1
Details	29	66	hsa-let-7c-3p	MRC1	mannose receptor C-type 1
Details	30	65	hsa-miR-607	MRC1	mannose receptor C-type 1
Details	31	65	hsa-miR-148a-5p	MRC1	mannose receptor C-type 1
Details	32	64	hsa-miR-7849-3p	MRC1	mannose receptor C-type 1
Details	33	63	hsa-miR-570-3p	MRC1	mannose receptor C-type 1
Details	34	63	hsa-miR-4659a-3p	MRC1	mannose receptor C-type 1
Details	35	63	hsa-miR-4659b-3p	MRC1	mannose receptor C-type 1
Details	36	62	hsa-miR-4490	MRC1	mannose receptor C-type 1
Details	37	61	hsa-miR-651-3p	MRC1	mannose receptor C-type 1
Details	38	60	hsa-miR-548ar-3p	MRC1	mannose receptor C-type 1
Details	39	60	hsa-miR-4300	MRC1	mannose receptor C-type 1
Details	40	60	hsa-miR-5591-5p	MRC1	mannose receptor C-type 1
Details	41	60	hsa-miR-4665-5p	MRC1	mannose receptor C-type 1
Details	42	59	hsa-miR-491-3p	MRC1	mannose receptor C-type 1
Details	43	59	hsa-miR-8077	MRC1	mannose receptor C-type 1
Details	44	58	hsa-miR-642a-5p	MRC1	mannose receptor C-type 1
Details	45	58	hsa-miR-196b-5p	MRC1	mannose receptor C-type 1
Details	46	58	hsa-miR-6726-5p	MRC1	mannose receptor C-type 1
Details	47	58	hsa-miR-196a-5p	MRC1	mannose receptor C-type 1
Details	48	58	hsa-miR-920	MRC1	mannose receptor C-type 1
Details	49	57	hsa-miR-5195-3p	MRC1	mannose receptor C-type 1
Details	50	57	hsa-miR-7157-5p	MRC1	mannose receptor C-type 1
Details	51	57	hsa-miR-145-5p	MRC1	mannose receptor C-type 1
Details	52	56	hsa-miR-4328	MRC1	mannose receptor C-type 1
Details	53	56	hsa-miR-10395-3p	MRC1	mannose receptor C-type 1
Details	54	56	hsa-miR-5692a	MRC1	mannose receptor C-type 1
Details	55	55	hsa-miR-548f-3p	MRC1	mannose receptor C-type 1
Details	56	55	hsa-miR-548e-3p	MRC1	mannose receptor C-type 1
Details	57	55	hsa-miR-548bc	MRC1	mannose receptor C-type 1
Details	58	55	hsa-miR-548a-3p	MRC1	mannose receptor C-type 1
Details	59	55	hsa-miR-548az-3p	MRC1	mannose receptor C-type 1
Details	60	53	hsa-miR-4436a	MRC1	mannose receptor C-type 1
Details	61	53	hsa-miR-5000-3p	MRC1	mannose receptor C-type 1
Details	62	52	hsa-miR-6830-3p	MRC1	mannose receptor C-type 1
Details	63	52	hsa-miR-548aj-3p	MRC1	mannose receptor C-type 1
Details	64	52	hsa-miR-30a-3p	MRC1	mannose receptor C-type 1
Details	65	52	hsa-miR-30e-3p	MRC1	mannose receptor C-type 1
Details	66	52	hsa-miR-30d-3p	MRC1	mannose receptor C-type 1
Details	67	52	hsa-miR-548x-3p	MRC1	mannose receptor C-type 1

## Sheet: TargetScan
miRNA	Position in the UTR	seed match	context++ score	context++ score percentile	weighted context++ score	conserved branch length	Pct	Predicted relative KD
Conserved sites
hsa-miR-23c	658-665	8mer	-0.33	96	-0.33	2.65	< 0.1	-3.871
hsa-miR-23b-3p	658-665	8mer	-0.32	95	-0.32	2.65	< 0.1	-3.871
hsa-miR-23a-3p	658-665	8mer	-0.32	95	-0.32	2.65	< 0.1	-3.871
hsa-miR-130a-5p	658-665	8mer	-0.32	95	-0.32	2.65	< 0.1	-4.078
Poorly conserved sites
hsa-miR-4330	15-21	7mer-1A	-0.13	91	-0.13	0	N/A	N/A
hsa-miR-1285-5p	17-23	7mer-1A	-0.02	69	-0.02	0	N/A	N/A
hsa-miR-3671	22-29	8mer	-0.24	98	-0.24	0	N/A	N/A
hsa-miR-607	23-29	7mer-m8	-0.02	69	-0.02	0	N/A	N/A
hsa-miR-590-3p	35-41	7mer-m8	-0.02	59	-0.02	0.057	N/A	N/A
hsa-miR-7849-3p	38-44	7mer-1A	-0.02	73	-0.02	0	N/A	N/A
hsa-miR-935	42-49	8mer	-0.36	98	-0.36	0.009	N/A	N/A
hsa-miR-30e-3p	45-51	7mer-m8	-0.09	87	-0.09	0.057	N/A	N/A
hsa-miR-30d-3p	45-51	7mer-m8	-0.08	86	-0.08	0.057	N/A	N/A
hsa-miR-30a-3p	45-51	7mer-m8	-0.08	86	-0.08	0.057	N/A	N/A
hsa-miR-205-3p	46-52	7mer-m8	-0.02	69	-0.02	0	N/A	N/A
hsa-miR-513a-3p	48-55	8mer	-0.03	89	-0.03	0	N/A	N/A
hsa-miR-3606-3p	48-55	8mer	-0.03	89	-0.03	0	N/A	N/A
hsa-miR-513c-3p	48-55	8mer	-0.03	89	-0.03	0	N/A	N/A
hsa-miR-590-3p	54-60	7mer-m8	-0.02	59	-0.02	0.009	N/A	N/A
hsa-miR-4282	56-62	7mer-m8	-0.03	87	-0.03	0	N/A	N/A
hsa-miR-548c-3p	58-64	7mer-1A	-0.01	57	-0.01	0.009	N/A	N/A
hsa-miR-7158-3p	63-70	8mer	-0.35	99	-0.35	0	N/A	N/A
hsa-miR-203b-3p	64-70	7mer-1A	-0.12	85	-0.12	0	N/A	N/A
hsa-miR-130a-5p	69-75	7mer-m8	-0.18	89	-0.18	2.171	0.14	-2.586
hsa-miR-23a-3p	69-75	7mer-m8	-0.17	88	-0.17	2.171	0.14	-2.938
hsa-miR-23b-3p	69-75	7mer-m8	-0.16	87	-0.16	2.171	0.14	-2.938
hsa-miR-23c	69-75	7mer-m8	-0.16	87	-0.16	2.171	0.14	-2.938
hsa-miR-4705	72-78	7mer-m8	-0.3	97	-0.3	0	N/A	N/A
hsa-miR-570-3p	77-83	7mer-m8	-0.12	86	-0.12	0	N/A	N/A
hsa-miR-186-5p	81-87	7mer-1A	-0.04	92	-0.04	0.358	N/A	-2.766
hsa-miR-3133	81-87	7mer-1A	-0.01	63	-0.01	0	N/A	N/A
hsa-miR-1250-3p	87-93	7mer-1A	-0.01	46	-0.01	0	N/A	N/A
hsa-miR-153-5p	87-93	7mer-1A	-0.01	33	-0.01	0.054	N/A	N/A
hsa-miR-222-5p	95-101	7mer-1A	-0.14	82	-0.14	0	N/A	N/A
hsa-miR-7849-3p	100-106	7mer-1A	-0.01	55	-0.01	0	N/A	N/A
hsa-miR-4712-5p	104-110	7mer-m8	-0.33	97	-0.33	0.009	N/A	-3.2
hsa-miR-770-5p	104-110	7mer-m8	-0.31	96	-0.31	0.009	N/A	-3.187
hsa-miR-8080	113-119	7mer-m8	-0.11	84	-0.11	0	N/A	N/A
hsa-miR-3148	119-125	7mer-m8	-0.04	69	-0.04	0	N/A	N/A
hsa-miR-651-3p	121-127	7mer-m8	-0.05	77	-0.05	0	N/A	N/A
hsa-miR-4423-3p	128-134	7mer-1A	-0.22	89	-0.22	0.009	N/A	N/A
hsa-miR-4275	132-138	7mer-1A	-0.01	46	-0.01	0	N/A	N/A
hsa-miR-676-5p	135-141	7mer-1A	-0.03	75	-0.03	0	N/A	N/A
hsa-miR-4659a-3p	137-143	7mer-1A	-0.17	91	-0.17	0	N/A	N/A
hsa-miR-4659b-3p	137-143	7mer-1A	-0.16	90	-0.16	0	N/A	N/A
hsa-miR-6875-3p	137-143	7mer-1A	-0.02	58	-0.02	0	N/A	N/A
hsa-miR-944	142-148	7mer-m8	-0.02	56	-0.02	0.057	N/A	-2.464
hsa-miR-570-3p	152-158	7mer-m8	-0.08	75	-0.08	0	N/A	N/A
hsa-miR-6508-5p	155-161	7mer-m8	-0.02	27	-0.02	0	N/A	N/A
hsa-miR-8067	155-161	7mer-m8	-0.02	27	-0.02	0	N/A	N/A
hsa-miR-4755-3p	161-168	8mer	-0.58	99	-0.58	0	N/A	N/A
hsa-miR-5006-5p	162-169	8mer	-0.35	97	-0.35	0	N/A	N/A
hsa-miR-3972	163-169	7mer-1A	-0.07	69	-0.07	0.009	N/A	N/A
hsa-miR-1202	163-169	7mer-1A	-0.02	55	-0.02	0.009	N/A	N/A
hsa-miR-642a-5p	184-190	7mer-m8	-0.23	96	-0.23	0.057	N/A	-4.806
hsa-miR-2276-5p	184-190	7mer-1A	-0.18	93	-0.18	0	N/A	N/A
hsa-miR-6892-3p	184-190	7mer-1A	-0.07	66	-0.07	0	N/A	N/A
hsa-miR-188-5p	186-192	7mer-1A	-0.16	88	-0.16	1.509	N/A	-3.34
hsa-miR-6866-3p	186-192	7mer-1A	-0.11	87	-0.11	1.509	N/A	-3.213
hsa-miR-4310	195-202	8mer	-0.24	97	-0.24	0	N/A	N/A
hsa-miR-7157-5p	195-202	8mer	-0.25	96	-0.25	0	N/A	N/A
hsa-miR-3617-3p	197-203	7mer-m8	-0.26	93	-0.26	0.054	N/A	N/A
hsa-miR-34a-3p	198-205	8mer	-0.4	99	-0.4	0	N/A	N/A
hsa-miR-196a-5p	205-211	7mer-m8	-0.33	96	-0.33	0.149	< 0.1	-4.532
hsa-miR-196b-5p	205-211	7mer-m8	-0.33	96	-0.33	0.149	< 0.1	-4.532
hsa-miR-548m	207-213	7mer-m8	-0.12	85	-0.12	0	N/A	N/A
hsa-miR-4729	227-233	7mer-m8	-0.02	55	-0.02	0	N/A	N/A
hsa-miR-3907	237-243	7mer-1A	-0.1	68	-0.1	0	N/A	N/A
hsa-miR-3907	245-251	7mer-1A	-0.13	73	-0.13	0	N/A	N/A
hsa-miR-576-3p	250-257	8mer	-0.15	86	-0.15	0.009	N/A	N/A
hsa-miR-155-5p	258-264	7mer-m8	-0.07	59	-0.07	0.592	< 0.1	-3.857
hsa-miR-34c-3p	263-269	7mer-m8	-0.02	31	-0.02	0.057	N/A	N/A
hsa-miR-6884-3p	265-271	7mer-m8	-0.09	78	-0.09	0	N/A	N/A
hsa-miR-660-5p	268-274	7mer-1A	-0.07	64	-0.07	0	N/A	-3.112
hsa-miR-5591-3p	268-274	7mer-m8	-0.07	59	-0.07	0	N/A	N/A
hsa-miR-5690	272-279	8mer	-0.19	94	-0.19	0	N/A	N/A
hsa-miR-3913-3p	277-284	8mer	-0.25	91	-0.25	0	N/A	N/A
hsa-miR-489-3p	278-284	7mer-m8	-0.06	81	-0.06	0.143	< 0.1	-3.518
hsa-miR-6719-3p	279-285	7mer-m8	-0.02	42	-0.02	0	N/A	N/A
hsa-miR-127-5p	284-290	7mer-m8	-0.13	84	-0.13	0	N/A	N/A
hsa-miR-6806-3p	284-290	7mer-1A	-0.08	77	-0.08	0.054	N/A	N/A
hsa-miR-3928-5p	284-290	7mer-1A	-0.03	60	-0.03	0.054	N/A	N/A
hsa-miR-8060	286-292	7mer-m8	-0.05	72	-0.05	0	N/A	N/A
hsa-miR-4668-3p	294-301	8mer	-0.03	88	-0.03	0	N/A	N/A
hsa-miR-4720-3p	299-305	7mer-1A	-0.09	74	-0.09	0	N/A	N/A
hsa-miR-4804-3p	299-305	7mer-1A	-0.04	68	-0.04	0	N/A	N/A
hsa-miR-302c-3p.2	301-307	7mer-m8	-0.15	86	-0.15	0.113	< 0.1	-3.979
hsa-miR-520f-3p	301-307	7mer-m8	-0.14	85	-0.14	0.113	< 0.1	-3.979
hsa-miR-5586-3p	304-310	7mer-1A	-0.14	85	-0.14	0	N/A	N/A
hsa-miR-523-5p	306-313	8mer	-0.29	97	-0.29	0.057	N/A	-4.658
hsa-miR-519c-5p	306-313	8mer	-0.29	97	-0.29	0.057	N/A	-4.658
hsa-miR-519b-5p	306-313	8mer	-0.29	97	-0.29	0.057	N/A	-4.658
hsa-miR-519a-5p	306-313	8mer	-0.29	97	-0.29	0.057	N/A	-4.658
hsa-miR-522-5p	306-313	8mer	-0.29	97	-0.29	0.057	N/A	-4.658
hsa-miR-518e-5p	306-313	8mer	-0.29	97	-0.29	0.057	N/A	-4.658
hsa-miR-518f-5p	306-313	8mer	-0.29	96	-0.29	0.057	N/A	-4.658
hsa-miR-526a	306-313	8mer	-0.29	96	-0.29	0.057	N/A	-4.658
hsa-miR-518d-5p	306-313	8mer	-0.29	96	-0.29	0.057	N/A	-4.658
hsa-miR-520c-5p	306-313	8mer	-0.29	96	-0.29	0.057	N/A	-4.658
hsa-miR-520g-5p	306-312	7mer-1A	-0.15	82	-0.15	0.009	N/A	N/A
hsa-miR-4777-5p	307-313	7mer-1A	-0.05	68	-0.05	0	N/A	N/A
hsa-miR-4289	314-320	7mer-1A	-0.07	81	-0.07	0	N/A	N/A
hsa-miR-4480	326-332	7mer-1A	-0.11	82	-0.11	0	N/A	N/A
hsa-miR-4448	339-345	7mer-m8	-0.12	88	-0.12	0	N/A	N/A
hsa-miR-5591-5p	343-350	8mer	-0.39	97	-0.39	0.009	N/A	N/A
hsa-miR-6726-5p	343-350	8mer	-0.38	96	-0.38	0.009	N/A	N/A
hsa-miR-4300	343-350	8mer	-0.37	96	-0.37	0.009	N/A	N/A
hsa-miR-920	343-350	8mer	-0.31	96	-0.31	0.009	N/A	N/A
hsa-miR-6090	344-350	7mer-1A	-0.15	89	-0.15	0	N/A	N/A
hsa-miR-6827-5p	344-350	7mer-1A	-0.12	68	-0.12	0	N/A	N/A
hsa-miR-887-5p	345-352	8mer	-0.23	93	-0.23	0	N/A	N/A
hsa-miR-30c-1-3p	345-351	7mer-1A	-0.13	86	-0.13	0	N/A	N/A
hsa-miR-30c-2-3p	345-351	7mer-1A	-0.13	85	-0.13	0	N/A	N/A
hsa-miR-6788-5p	345-351	7mer-1A	-0.12	81	-0.12	0	N/A	N/A
hsa-miR-3689a-3p	345-351	7mer-1A	-0.12	72	-0.12	0	N/A	N/A
hsa-miR-3689b-3p	345-351	7mer-1A	-0.12	72	-0.12	0	N/A	N/A
hsa-miR-3689c	345-351	7mer-1A	-0.12	72	-0.12	0	N/A	N/A
hsa-miR-30b-3p	345-351	7mer-1A	-0.08	62	-0.08	0	N/A	N/A
hsa-miR-6779-5p	345-351	7mer-1A	-0.07	57	-0.07	0	N/A	N/A
hsa-miR-1273h-5p	345-351	7mer-1A	-0.07	55	-0.07	0	N/A	N/A
hsa-miR-6780a-5p	345-351	7mer-1A	-0.05	50	-0.05	0	N/A	N/A
hsa-miR-450a-1-3p	346-352	7mer-1A	-0.1	76	-0.1	0	N/A	N/A
hsa-miR-3913-5p	346-352	7mer-1A	-0.03	72	-0.03	0	N/A	N/A
hsa-miR-6513-5p	346-352	7mer-1A	-0.02	52	-0.02	0	N/A	N/A
hsa-miR-3122	346-352	7mer-1A	-0.01	41	-0.01	0	N/A	N/A
hsa-miR-633	362-368	7mer-1A	-0.04	64	-0.04	0	N/A	N/A
hsa-miR-7849-3p	368-374	7mer-1A	-0.01	55	-0.01	0	N/A	N/A
hsa-miR-4424	373-379	7mer-1A	-0.15	77	-0.15	0	N/A	-2.683
hsa-miR-4682	374-380	7mer-m8	-0.12	86	-0.12	0	N/A	N/A
hsa-miR-8077	375-382	8mer	-0.3	98	-0.3	0	N/A	N/A
hsa-miR-4663	376-382	7mer-1A	-0.11	84	-0.11	0	N/A	N/A
hsa-miR-7160-5p	376-382	7mer-1A	-0.07	61	-0.07	0	N/A	N/A
hsa-miR-628-5p	377-383	7mer-1A	-0.12	83	-0.12	0	N/A	-3.906
hsa-miR-138-1-3p	382-388	7mer-1A	-0.01	49	-0.01	0	N/A	N/A
hsa-miR-6740-3p	386-392	7mer-m8	-0.13	78	-0.13	0	N/A	N/A
hsa-miR-224-3p	391-397	7mer-m8	-0.02	64	-0.02	0.057	N/A	-3.888
hsa-miR-522-3p	391-397	7mer-m8	-0.02	53	-0.02	0.057	N/A	-3.062
hsa-miR-7853-5p	393-399	7mer-1A	-0.01	48	-0.01	0.057	N/A	-3.307
hsa-miR-105-5p	393-399	7mer-1A	-0.01	48	-0.01	0.057	N/A	-2.992
hsa-miR-3671	394-400	7mer-1A	-0.09	86	-0.09	0	N/A	N/A
hsa-miR-607	394-401	8mer	-0.03	85	-0.03	0	N/A	N/A
hsa-miR-1305	396-402	7mer-1A	-0.01	49	-0.01	0	N/A	N/A
hsa-miR-5003-3p	398-404	7mer-m8	-0.05	86	-0.05	0	N/A	N/A
hsa-miR-3915	416-423	8mer	-0.24	95	-0.24	0	N/A	N/A
hsa-miR-3928-3p	416-422	7mer-1A	-0.02	74	-0.02	0	N/A	N/A
hsa-miR-6858-5p	417-423	7mer-1A	-0.16	92	-0.16	0	N/A	N/A
hsa-miR-4689	417-423	7mer-1A	-0.19	90	-0.19	0	N/A	N/A
hsa-miR-1224-5p	417-423	7mer-1A	-0.04	74	-0.04	0.065	N/A	-2.631
hsa-miR-4252	423-429	7mer-1A	-0.1	80	-0.1	0	N/A	N/A
hsa-miR-4633-5p	426-432	7mer-1A	-0.16	74	-0.16	0	N/A	N/A
hsa-miR-491-3p	427-433	7mer-1A	-0.1	62	-0.1	0.057	N/A	N/A
hsa-miR-153-5p	431-437	7mer-m8	-0.02	50	-0.02	0.054	N/A	N/A
hsa-miR-548ar-3p	442-448	7mer-m8	-0.09	93	-0.09	0.009	N/A	N/A
hsa-miR-548e-3p	442-448	7mer-m8	-0.07	90	-0.07	0.009	N/A	N/A
hsa-miR-548f-3p	442-448	7mer-m8	-0.05	85	-0.05	0.009	N/A	N/A
hsa-miR-548az-3p	442-448	7mer-m8	-0.04	83	-0.04	0.009	N/A	N/A
hsa-miR-548a-3p	442-448	7mer-m8	-0.03	82	-0.03	0.009	N/A	N/A
hsa-miR-4311	448-454	7mer-m8	-0.06	90	-0.06	0	N/A	N/A
hsa-miR-4490	454-460	7mer-m8	-0.25	92	-0.25	0	N/A	N/A
hsa-miR-582-3p	456-462	7mer-m8	-0.34	98	-0.34	0.054	N/A	-3.61
hsa-miR-548ar-3p	458-464	7mer-m8	-0.07	89	-0.07	0.009	N/A	N/A
hsa-miR-548f-3p	458-464	7mer-m8	-0.06	87	-0.06	0.009	N/A	N/A
hsa-miR-548e-3p	458-464	7mer-m8	-0.06	87	-0.06	0.009	N/A	N/A
hsa-miR-548az-3p	458-464	7mer-m8	-0.05	85	-0.05	0.009	N/A	N/A
hsa-miR-548a-3p	458-464	7mer-m8	-0.04	84	-0.04	0.009	N/A	N/A
hsa-miR-548ah-3p	459-466	8mer	-0.13	98	-0.13	0.054	N/A	N/A
hsa-miR-548j-3p	459-466	8mer	-0.14	98	-0.14	0.054	N/A	N/A
hsa-miR-548aq-3p	459-466	8mer	-0.13	98	-0.13	0.054	N/A	N/A
hsa-miR-548am-3p	459-466	8mer	-0.13	98	-0.13	0.054	N/A	N/A
hsa-miR-548ae-3p	459-466	8mer	-0.13	98	-0.13	0.054	N/A	N/A
hsa-miR-548x-3p	459-466	8mer	-0.11	97	-0.11	0.054	N/A	N/A
hsa-miR-548aj-3p	459-466	8mer	-0.11	97	-0.11	0.054	N/A	N/A
hsa-miR-548d-3p	460-466	7mer-1A	-0.01	57	-0.01	0.054	N/A	N/A
hsa-miR-548z	460-466	7mer-1A	-0.01	57	-0.01	0.054	N/A	N/A
hsa-miR-548bb-3p	460-466	7mer-1A	-0.01	57	-0.01	0.054	N/A	N/A
hsa-miR-548ac	460-466	7mer-1A	-0.01	57	-0.01	0.054	N/A	N/A
hsa-miR-548h-3p	460-466	7mer-1A	-0.01	57	-0.01	0.054	N/A	N/A
hsa-miR-5093	466-472	7mer-1A	-0.13	88	-0.13	0	N/A	N/A
hsa-miR-122-5p	471-477	7mer-1A	-0.14	88	-0.14	1.057	< 0.1	-3.935
hsa-miR-504-3p	471-477	7mer-1A	-0.07	71	-0.07	0	N/A	N/A
hsa-miR-3198	472-478	7mer-1A	-0.08	83	-0.08	0	N/A	N/A
hsa-miR-4309	472-478	7mer-1A	-0.12	81	-0.12	0	N/A	N/A
hsa-miR-5692a	478-485	8mer	-0.03	91	-0.03	0	N/A	N/A
hsa-miR-4799-5p	481-488	8mer	-0.14	96	-0.14	0	N/A	N/A
hsa-miR-3168	484-490	7mer-m8	-0.15	95	-0.15	0	N/A	N/A
hsa-miR-148a-5p	485-491	7mer-m8	-0.16	92	-0.16	0.054	N/A	N/A
hsa-miR-548at-5p	487-493	7mer-1A	-0.08	87	-0.08	0	N/A	N/A
hsa-miR-561-3p	487-493	7mer-1A	-0.01	51	-0.01	0	N/A	N/A
hsa-miR-142-5p	488-494	7mer-m8	-0.06	86	-0.06	0.085	< 0.1	-3.505
hsa-miR-5590-3p	488-494	7mer-m8	-0.06	85	-0.06	0.085	< 0.1	-3.372
hsa-let-7c-3p	495-501	7mer-m8	-0.14	88	-0.14	0.054	N/A	N/A
hsa-miR-5589-3p	500-507	8mer	-0.33	97	-0.33	0	N/A	N/A
hsa-miR-4793-3p	503-509	7mer-1A	-0.11	86	-0.11	0	N/A	N/A
hsa-miR-3130-3p	503-509	7mer-1A	-0.07	83	-0.07	0	N/A	N/A
hsa-miR-544a-3p	504-510	7mer-m8	-0.08	65	-0.08	0.348	N/A	N/A
hsa-miR-3182	506-512	7mer-1A	-0.03	79	-0.03	0	N/A	N/A
hsa-miR-4659b-3p	507-513	7mer-m8	-0.17	92	-0.17	0	N/A	N/A
hsa-miR-4659a-3p	507-513	7mer-m8	-0.17	92	-0.17	0	N/A	N/A
hsa-miR-6882-3p	516-522	7mer-m8	-0.31	95	-0.31	0	N/A	N/A
hsa-miR-22-3p	517-523	7mer-m8	-0.31	95	-0.31	1.976	0.28	-5.846
hsa-miR-1207-3p	519-525	7mer-1A	-0.1	80	-0.1	0.236	N/A	N/A
hsa-miR-6787-3p	520-527	8mer	-0.26	97	-0.26	0	N/A	N/A
hsa-miR-4261	532-538	7mer-m8	-0.05	52	-0.05	0	N/A	N/A
hsa-miR-625-5p	535-542	8mer	-0.36	94	-0.36	0	N/A	-2.603
hsa-miR-4665-5p	536-543	8mer	-0.38	96	-0.38	0.009	N/A	N/A
hsa-miR-1275	536-543	8mer	-0.29	95	-0.29	0.009	N/A	N/A
hsa-miR-5010-5p	536-542	7mer-1A	-0.21	85	-0.21	0	N/A	-1.746
hsa-miR-4525	536-542	7mer-1A	-0.15	84	-0.15	0	N/A	-1.388
hsa-miR-4723-5p	536-542	7mer-1A	-0.21	72	-0.21	0	N/A	N/A
hsa-miR-5698	536-542	7mer-1A	-0.2	69	-0.2	0	N/A	N/A
hsa-miR-7111-5p	536-542	7mer-1A	-0.18	63	-0.18	0	N/A	N/A
hsa-miR-6870-5p	536-542	7mer-1A	-0.16	61	-0.16	0	N/A	N/A
hsa-miR-7109-5p	537-543	7mer-1A	-0.21	83	-0.21	0	N/A	N/A
hsa-miR-6803-5p	537-543	7mer-1A	-0.16	79	-0.16	0	N/A	N/A
hsa-miR-6751-5p	537-543	7mer-1A	-0.14	77	-0.14	0	N/A	N/A
hsa-miR-635	539-545	7mer-1A	-0.12	81	-0.12	0.009	N/A	N/A
hsa-miR-6774-5p	539-545	7mer-1A	-0.05	64	-0.05	0.009	N/A	N/A
hsa-miR-548a-3p	547-553	7mer-1A	-0.01	47	-0.01	0.009	N/A	N/A
hsa-miR-5582-3p	547-553	7mer-1A	-0.01	47	-0.01	0	N/A	N/A
hsa-miR-548az-3p	547-553	7mer-1A	-0.01	46	-0.01	0.009	N/A	N/A
hsa-miR-548ar-3p	547-553	7mer-1A	-0.01	46	-0.01	0.009	N/A	N/A
hsa-miR-548e-3p	547-553	7mer-1A	-0.01	46	-0.01	0.009	N/A	N/A
hsa-miR-548f-3p	547-553	7mer-1A	-0.01	45	-0.01	0.009	N/A	N/A
hsa-miR-3607-3p	550-556	7mer-m8	-0.02	46	-0.02	0	N/A	N/A
hsa-miR-512-5p	557-563	7mer-m8	-0.16	89	-0.16	0.054	N/A	N/A
hsa-miR-450b-5p	565-571	7mer-m8	-0.11	86	-0.11	0.228	N/A	-3.14
hsa-miR-3133	575-581	7mer-m8	-0.04	90	-0.04	0	N/A	N/A
hsa-miR-5000-3p	581-587	7mer-m8	-0.22	92	-0.22	0.345	N/A	-3.737
hsa-miR-4436a	581-587	7mer-m8	-0.17	92	-0.17	0.345	N/A	-3.509
hsa-miR-4700-3p	582-588	7mer-m8	-0.21	95	-0.21	0	N/A	N/A
hsa-miR-410-3p	587-593	7mer-m8	-0.02	79	-0.02	1.168	N/A	-2.745
hsa-miR-5580-3p	590-596	7mer-1A	-0.04	75	-0.04	0	N/A	N/A
hsa-miR-1200	599-605	7mer-1A	-0.13	84	-0.13	0	N/A	N/A
hsa-miR-378a-5p	599-605	7mer-1A	-0.09	84	-0.09	0	N/A	N/A
hsa-miR-630	603-609	7mer-1A	-0.09	64	-0.09	0.009	N/A	N/A
hsa-miR-643	605-611	7mer-m8	-0.14	85	-0.14	0.057	N/A	N/A
hsa-miR-362-5p	608-614	7mer-m8	-0.19	92	-0.19	0.149	N/A	-3.068
hsa-miR-23b-3p	613-619	7mer-1A	-0.13	83	-0.13	2.79	0.12	-2.842
hsa-miR-23c	613-619	7mer-1A	-0.13	83	-0.13	2.79	0.12	-2.842
hsa-miR-23a-3p	613-619	7mer-1A	-0.13	83	-0.13	2.79	0.12	-2.842
hsa-miR-130a-5p	613-619	7mer-1A	-0.1	79	-0.1	2.79	0.12	-2.681
hsa-miR-205-3p	616-622	7mer-1A	-0.01	50	-0.01	0	N/A	N/A
hsa-miR-4328	622-628	7mer-m8	-0.13	92	-0.13	0	N/A	N/A
hsa-miR-582-5p	624-631	8mer	-0.32	98	-0.32	0.2	N/A	-5.462
hsa-miR-101-3p.2	625-631	7mer-1A	-0.13	89	-0.13	0.2	< 0.1	-3.915
hsa-miR-491-3p	635-641	7mer-m8	-0.15	76	-0.15	0.467	N/A	N/A
hsa-miR-145-5p	640-646	7mer-m8	-0.2	92	-0.2	2.04	0.12	-4.769
hsa-miR-5195-3p	640-646	7mer-m8	-0.24	91	-0.24	2.04	0.12	-5.005
hsa-miR-205-3p	662-668	7mer-1A	-0.01	50	-0.01	0.32	N/A	N/A
hsa-miR-33a-3p	668-675	8mer	-0.15	95	-0.15	0.323	N/A	N/A
hsa-miR-409-3p	669-675	7mer-1A	-0.01	57	-0.01	1.34	N/A	-2.488
hsa-miR-302d-5p	673-679	7mer-1A	-0.01	50	-0.01	0.32	N/A	N/A
hsa-miR-302b-5p	673-679	7mer-1A	-0.01	49	-0.01	0.32	N/A	N/A
hsa-miR-511-5p	675-682	8mer	-0.17	95	-0.17	0.009	N/A	N/A
hsa-miR-6830-3p	675-681	7mer-1A	-0.02	51	-0.02	0	N/A	N/A
hsa-miR-3684	682-688	7mer-m8	-0.35	95	-0.35	0	N/A	N/A
hsa-miR-3121-3p	685-691	7mer-m8	-0.07	86	-0.07	0.009	N/A	-2.935
hsa-miR-548c-3p	688-694	7mer-1A	-0.01	57	-0.01	0.236	N/A	N/A
