# Supplementary material for: Bioinformatics analysis of neutrophil-associated hub genes and ceRNA network construction in septic cardiomyopathy
Source: Aging (Albany NY). 2024 Aug 30;16(19):12833–49. doi: 10.18632/aging.206092 (PMC11501391; doi:10.18632/aging.206092)
Supplement: Supplementary Table 5 [file aging-16-206092-s006.xlsx]

## Sheet: StarBase
Supplementary Table 5. The lncRNA prediction results for miR-23a-3p.
#please cite:
#Zhou KR, Liu S, Li B, Liu SR, Zheng WJ, Cai L, et al. An encyclopedia of RNA interactomes in ENCORI.
#Li JH, et al.starBase v2.0: decoding miRNA-ceRNA, miRNA-ncRNA and protein-RNA interaction networks from large-scale CLIP-Seq data , Nucleic Acids Res. 2014 Jan;42:D92-7.
#Please note that the genomic locous are in 1-base (not bed format)
miRNAid	miRNAname	geneID	geneName	geneType	chromosome	start	end	strand	clipExpNum	degraExpNum	RBP	merClass	miRseq	align	targetSeq	TDMDScore	phyloP	pancancerNum
MIMAT0000078	hsa-miR-23a-3p	ENSG00000226476	LINC01748	lncRNA	chr1	60595731	60595751	-	0	0	NA	7mer-m8	ccuuuagggacCGUUACACUa	| |||||||||	gugucagagauGCAAUGUGAg	0.0476	-0.548	3
MIMAT0000078	hsa-miR-23a-3p	ENSG00000226476	LINC01748	lncRNA	chr1	60600814	60600837	-	1	0	AGO1-4	8mer	ccUUUAGG---GACCGUUACACUa	|||| || | ||||||||	ugAAACCCUAACAACCAAUGUGAa	1.0871	0.114	3
MIMAT0000078	hsa-miR-23a-3p	ENSG00000234741	GAS5	lncRNA	chr1	173864566	173864586	-	0	0	NA	7mer-m8	ccuuuagggaccgUUACACUa	| | | |||||||	guuuaaaaguuaaAAUGUGAc	0.367	-0.396	8
MIMAT0000078	hsa-miR-23a-3p	ENSG00000234741	GAS5	lncRNA	chr1	173866374	173866396	-	3	0	AGO2	8mer	ccuUUAGGG--ACCGUUACACUa	||| |: | |||||||	uuuAAUACUGAAGAAAAUGUGAa	0.7294	-0.897	8
MIMAT0000078	hsa-miR-23a-3p	ENSG00000206573	THUMPD3-AS1	lncRNA	chr3	9385549	9385571	-	0	0	NA	8mer	ccuUUAGGGAC--CGUUACACUa	| ||: || :|||||||	uucAUUCUGUGUAUUAAUGUGAa	0.8338	0.085	13
MIMAT0000078	hsa-miR-23a-3p	ENSG00000206573	THUMPD3-AS1	lncRNA	chr3	9385856	9385875	-	0	0	NA	8mer	ccUUUAGGGACCGUUACACUa	| ||| | | |||||||	gaAAAGCAAU-UAAAUGUGAa	0.9942	0.532	13
MIMAT0000078	hsa-miR-23a-3p	ENSG00000206573	THUMPD3-AS1	lncRNA	chr3	9388921	9388940	-	1	0	AGO1	8mer	ccuUUAGGGACCGUUACACUa	| |:| | ||||||||	uauACUUCAU-ACAAUGUGAa	0.8026	-0.075	13
MIMAT0000078	hsa-miR-23a-3p	ENSG00000206573	THUMPD3-AS1	lncRNA	chr3	9395025	9395045	-	1	0	AGO1	7mer-m8	ccuuUAGGGACCGUUACACUa	:|:|: | |||||||	uucuGUUCUCGUGAAUGUGAu	0.7073	-0.061	13
MIMAT0000078	hsa-miR-23a-3p	ENSG00000224822	THRB-IT1	lncRNA	chr3	24458784	24458803	-	3	0	AGO1-4,AGO2	7mer-m8	ccuuuAGGGACCGUUACACUa	|::|| |:|||||||	uaucuUUUCU-GUAAUGUGAc	0.8029	0.155	10
MIMAT0000078	hsa-miR-23a-3p	ENSG00000248092	NNT-AS1	lncRNA	chr5	43572361	43572381	-	1	0	AGO2	8mer	ccuuuagggaccgUUACACUa	|||||||	uuuuuaaaaguugAAUGUGAa	-0.6667	0.169	11
MIMAT0000078	hsa-miR-23a-3p	ENSG00000269293	ZSCAN16-AS1	lncRNA	chr6	28122967	28122986	-	1	0	AGO2	8mer	ccuuuaggGACCGUUACACUa	| || | |||||||	acaguagaCUUG-AAUGUGAa	0.4777	0.007	20
MIMAT0000078	hsa-miR-23a-3p	ENSG00000203875	SNHG5	lncRNA	chr6	85677817	85677838	-	4	12	AGO2	7mer-m8	ccuUUAGGGACCG-UUACACUa	| ||| || | |||||||	gauAAUGAAUGUCGAAUGUGAc	1.0743	-0.443	6
MIMAT0000078	hsa-miR-23a-3p	ENSG00000225498	AC002064.1	lncRNA	chr7	90322464	90322484	+	1	0	AGO2	7mer-m8	ccUUUAGGGACCGUUACACUa	|: | ::| ||||||||	aaAGCUGUUUUCCAAUGUGAc	0.9524	0.106	7
MIMAT0000078	hsa-miR-23a-3p	ENSG00000243107	AC000120.1	lncRNA	chr7	92200111	92200133	-	8	0	AGO1-4,AGO2	7mer-m8	ccUUUAGGGACCG--UUACACUa	|:|||:: ||: |||||||	agGAAUUUGGGGUGGAAUGUGAu	1.2915	1.047	7
MIMAT0000078	hsa-miR-23a-3p	ENSG00000225484	NUTM2B-AS1	lncRNA	chr10	79718809	79718828	-	1	0	AGO2	8mer	ccuuUAGGGACCGUUACACUa	| ||: || :|||||||	ugccAUUACU-CUAAUGUGAa	1.0116	-0.139	5
MIMAT0000078	hsa-miR-23a-3p	ENSG00000225484	NUTM2B-AS1	lncRNA	chr10	79721291	79721311	-	0	0	NA	7mer-m8	ccuUUAGGGACCGUUACACUa	||| :| | |||||||	uuuAAUAUCAGAAAAUGUGAg	0.9593	0.248	5
MIMAT0000078	hsa-miR-23a-3p	ENSG00000225484	NUTM2B-AS1	lncRNA	chr10	79808866	79808886	-	0	0	NA	7mer-m8	ccuuuagggaccgUUACACUa	||| | |||||||	agaaggaacaaagAAUGUGAc	0.6736	-0.236	5
MIMAT0000078	hsa-miR-23a-3p	ENSG00000285338	AC091564.7	lncRNA	chr11	6610944	6610964	-	4	5	AGO2	8mer	ccuuuagggaccGUUACACUa	|| ||||||||	cgaguauggcauCAAUGUGAa	0.1823	5.459	0
MIMAT0000078	hsa-miR-23a-3p	ENSG00000245532	NEAT1	lncRNA	chr11	65426749	65426773	+	3	0	AGO1-4,AGO2	7mer-m8	ccuUUAGGGACCG----UUACACUa	|| |||| :|||: |||||||	gguAAUCAUUGGUUUGAAAUGUGAu	1.5435	-0.18	4
MIMAT0000078	hsa-miR-23a-3p	ENSG00000245532	NEAT1	lncRNA	chr11	65436994	65437014	+	5	0	AGO1-4,AGO2	7mer-m8	ccuuuAGGGACCGUUACACUa	| ::|| ||||||||	uugguUAUUUGUCAAUGUGAg	0.7553	-0.075	4
MIMAT0000078	hsa-miR-23a-3p	ENSG00000245532	NEAT1	lncRNA	chr11	65439737	65439761	+	13	0	AGO1,AGO1-4,AGO2	8mer	ccUUUAGGG----ACCGUUACACUa	||:||:| || :|||||||	aaAAGUCUCAAGGUGUUAAUGUGAa	0.8942	0.147	4
MIMAT0000078	hsa-miR-23a-3p	ENSG00000245532	NEAT1	lncRNA	chr11	65439831	65439848	+	3	0	AGO1-4,AGO2	8mer	ccUUUAGGGACCGUUACACUa	:::|:|:| |||||||	uuGGGUUCUU---AAUGUGAa	0.892	-0.047	4
MIMAT0000078	hsa-miR-23a-3p	ENSG00000251562	MALAT1	lncRNA	chr11	65500253	65500273	+	29	0	AGO1-4,AGO2	8mer	ccuuuagggaccgUUACACUa	| | |||||||	gcuuaguuugaaaAAUGUGAa	0.0407	0.443	7
MIMAT0000078	hsa-miR-23a-3p	ENSG00000251562	MALAT1	lncRNA	chr11	65501800	65501820	+	10	0	AGO1-4,AGO2	7mer-m8	ccUUUAGGGACCGUUACACUa	|: |::| :|||||||	uaAGUUUUCCAAUAAUGUGAc	0.9048	0.889	7
MIMAT0000078	hsa-miR-23a-3p	ENSG00000255693	LINC02389	lncRNA	chr12	64977438	64977462	+	1	0	AGO2	7mer-m8	ccUUUAGGGACC----GUUACACUa	:|||:: || ||||||||	auGAAUUUAAGGUGUACAAUGUGAu	0.986	0.098	11
MIMAT0000078	hsa-miR-23a-3p	ENSG00000281344	HELLPAR	lncRNA	chr12	102225152	102225172	+	0	0	NA	7mer-m8	ccuuUAGGGACCGUUACACUa	:||:| ||||||||	auuuGUCUCAUUCAAUGUGAg	0.7944	0.643	4
MIMAT0000078	hsa-miR-23a-3p	ENSG00000281344	HELLPAR	lncRNA	chr12	102233928	102233951	+	0	0	NA	7mer-m8	ccuuUAGGGACC---GUUACACUa	|||| ||| ||||||||	aacuAUCCAUGGGAUCAAUGUGAu	1.1638	-0.064	4
MIMAT0000078	hsa-miR-23a-3p	ENSG00000281344	HELLPAR	lncRNA	chr12	102234589	102234609	+	0	0	NA	8mer	ccuuuagggaccgUUACACUa	| | |||||||	caucaagaaagugAAUGUGAa	0.1177	0.139	4
MIMAT0000078	hsa-miR-23a-3p	ENSG00000281344	HELLPAR	lncRNA	chr12	102244346	102244364	+	0	0	NA	7mer-m8	ccUUUAGGGACCGUUACACUa	|||:| : ||:|||||||	ugAAGU--UGGGUAAUGUGAu	1.2126	0.199	4
MIMAT0000078	hsa-miR-23a-3p	ENSG00000281344	HELLPAR	lncRNA	chr12	102261987	102262007	+	0	0	NA	8mer	ccuuuagggaccgUUACACUa	| | |||||||	cuguaaaauuaagAAUGUGAa	0.1765	0.27	4
MIMAT0000078	hsa-miR-23a-3p	ENSG00000281344	HELLPAR	lncRNA	chr12	102262239	102262263	+	2	0	AGO1-4,AGO2	7mer-m8	ccUUUAGGGACCG----UUACACUa	| |:||::| || |||||||	guAGAUUUCAAGCUAUAAAUGUGAu	1.0789	0.315	4
MIMAT0000078	hsa-miR-23a-3p	ENSG00000281344	HELLPAR	lncRNA	chr12	102262775	102262797	+	0	0	NA	7mer-m8	ccUUUA-GGGAC-CGUUACACUa	||||| : || |||||||	agAAAUAUAAUGAAGAAUGUGAg	1.3419	0.378	4
MIMAT0000078	hsa-miR-23a-3p	ENSG00000281344	HELLPAR	lncRNA	chr12	102273569	102273588	+	0	0	NA	8mer	ccuUUAGGGACCG-UUACACUa	| ||| :|||: |||||||	gcuAAU--UUGGUGAAUGUGAa	1.2544	0.434	4
MIMAT0000078	hsa-miR-23a-3p	ENSG00000281344	HELLPAR	lncRNA	chr12	102274168	102274190	+	0	0	NA	8mer	ccUUUAGGGACCG--UUACACUa	| :||| |:| | |||||||	gaGAAUGCUUUUCCUAAUGUGAa	1.1847	0.077	4
MIMAT0000078	hsa-miR-23a-3p	ENSG00000281344	HELLPAR	lncRNA	chr12	102275505	102275525	+	0	0	NA	7mer-m8	ccuuuagggaccGUUACACUa	| | :|||||||	aaacagaaugaaUAAUGUGAu	0.266	0.162	4
MIMAT0000078	hsa-miR-23a-3p	ENSG00000281344	HELLPAR	lncRNA	chr12	102277153	102277173	+	0	0	NA	7mer-m8	ccuuuaGGGACCGUUACACUa	||| |:| :|||||||	ggaccaCUCCACUAAUGUGAg	1.0546	0.396	4
MIMAT0000078	hsa-miR-23a-3p	ENSG00000281344	HELLPAR	lncRNA	chr12	102279321	102279341	+	0	0	NA	7mer-m8	ccuuuagggaccgUUACACUa	| | | |||||||	aacacuauauauaAAUGUGAg	0.4146	0.142	4
MIMAT0000078	hsa-miR-23a-3p	ENSG00000281344	HELLPAR	lncRNA	chr12	102280189	102280209	+	0	0	NA	8mer	ccuuuagggaccgUUACACUa	|| | |||||||	ugaguagugagugAAUGUGAa	0.2548	0.166	4
MIMAT0000078	hsa-miR-23a-3p	ENSG00000281344	HELLPAR	lncRNA	chr12	102289881	102289902	+	0	0	NA	7mer-m8	ccuuUAGGGAC-CGUUACACUa	| |||| || |||||||	ugccAUCCAUGUAAAAUGUGAc	1.2241	-0.066	4
MIMAT0000078	hsa-miR-23a-3p	ENSG00000281344	HELLPAR	lncRNA	chr12	102290495	102290515	+	0	0	NA	7mer-m8	ccuuuagGGACCGUUACACUa	|||| ||||||||	uuugcagCCUGACAAUGUGAu	0.7055	0.244	4
MIMAT0000078	hsa-miR-23a-3p	ENSG00000281344	HELLPAR	lncRNA	chr12	102294753	102294771	+	0	0	NA	7mer-m8	ccuuUAGGGACCGUUACACUa	||::| | |||||||	cuguAUUUCAG--AAUGUGAc	0.7189	0.15	4
MIMAT0000078	hsa-miR-23a-3p	ENSG00000281344	HELLPAR	lncRNA	chr12	102297086	102297104	+	0	0	NA	7mer-m8	ccUUUAGGGACCGUUACACUa	|||:| | ||||||||||	ugAAGU--CAGGCAAUGUGAu	1.3078	0.21	4
MIMAT0000078	hsa-miR-23a-3p	ENSG00000281344	HELLPAR	lncRNA	chr12	102322029	102322049	+	0	0	NA	8mer	ccuuuagggaccgUUACACUa	| || |||||||	uguuauaagaauaAAUGUGAa	0.3531	0.202	4
MIMAT0000078	hsa-miR-23a-3p	ENSG00000281344	HELLPAR	lncRNA	chr12	102327100	102327122	+	0	0	NA	7mer-m8	ccuUUAGGGA-C-CGUUACACUa	||||| | | | |||||||	uuuAAUCCAUAGAGGAAUGUGAc	1.3152	0.45	4
MIMAT0000078	hsa-miR-23a-3p	ENSG00000281344	HELLPAR	lncRNA	chr12	102328004	102328025	+	0	0	NA	7mer-m8	ccuUUAGGGAC-CGUUACACUa	|:|| | | ||||||||	aacAGUCACAGAACAAUGUGAu	0.9372	0.047	4
MIMAT0000078	hsa-miR-23a-3p	ENSG00000281344	HELLPAR	lncRNA	chr12	102336189	102336209	+	0	0	NA	8mer	ccuuuagggACCGUUACACUa	| |||||||||||	cagaggagaUGGCAAUGUGAa	0.7549	-0.113	4
MIMAT0000078	hsa-miR-23a-3p	ENSG00000281344	HELLPAR	lncRNA	chr12	102340564	102340584	+	0	0	NA	8mer	ccuuuagggaccgUUACACUa	|||||||	aacggaaagaaaaAAUGUGAa	-0.6667	0.423	4
MIMAT0000078	hsa-miR-23a-3p	ENSG00000281344	HELLPAR	lncRNA	chr12	102341152	102341177	+	0	0	NA	7mer-m8	ccUUUAGGGACC----G-UUACACUa	||:| |: || | |||||||	caAAGUGCUAGGAUUACAAAUGUGAg	0.6643	0.18	4
MIMAT0000078	hsa-miR-23a-3p	ENSG00000281344	HELLPAR	lncRNA	chr12	102358689	102358709	+	0	0	NA	7mer-m8	ccuuuaGGGACCGUUACACUa	|| | |||||||	cuuuggCCAAUGAAAUGUGAg	0.2786	0.419	4
MIMAT0000078	hsa-miR-23a-3p	ENSG00000281344	HELLPAR	lncRNA	chr12	102358830	102358850	+	0	0	NA	8mer	ccuuuagggACCGUUACACUa	| || ||||||||	ccugagugaUGACAAUGUGAa	0.5017	0.067	4
MIMAT0000078	hsa-miR-23a-3p	ENSG00000281344	HELLPAR	lncRNA	chr12	102367722	102367743	+	0	0	NA	7mer-m8	ccuuUAGGGA-CCGUUACACUa	|| || |||||||||	uccuAUGACUAUGCAAUGUGAc	0.8141	0.153	4
MIMAT0000078	hsa-miR-23a-3p	ENSG00000281344	HELLPAR	lncRNA	chr12	102384111	102384129	+	0	0	NA	7mer-m8	ccuuuagGGACCGUUACACUa	||| ||||||||	acuucagCCU--CAAUGUGAu	0.3721	0.215	4
MIMAT0000078	hsa-miR-23a-3p	ENSG00000258210	AC144548.1	lncRNA	chr12	110387835	110387859	-	2	1	AGO2	7mer-m8	ccuuUAGGGACCG----UUACACUa	| |||| || | |||||||	uggcAUCCAUGACAAUGAAUGUGAu	1.0813	5.417	7
MIMAT0000078	hsa-miR-23a-3p	ENSG00000214548	MEG3	lncRNA	chr14	100833042	100833061	+	1	0	AGO2	8mer	ccUUUAGGGACCGUUACACUa	||:|:| || ||||||||	ggGAGUGACU-ACAAUGUGAa	1.2973	-0.861	14
MIMAT0000078	hsa-miR-23a-3p	ENSG00000258593	AL583810.1	lncRNA	chr14	104858725	104858745	-	2	0	AGO2	8mer	ccuuuagggaccGUUACACUa	| ||||||||	augguuguacaaCAAUGUGAa	0.1247	0.264	9
MIMAT0000078	hsa-miR-23a-3p	ENSG00000251161	AC020661.1	lncRNA	chr15	40909300	40909321	+	1	0	AGO2	8mer	ccuuuaGGGAC-CGUUACACUa	:|||| |||||||	uucuucUCCUGUAAAAUGUGAa	0.641	0.122	8
MIMAT0000078	hsa-miR-23a-3p	ENSG00000247556	OIP5-AS1	lncRNA	chr15	41305273	41305293	+	2	0	AGO2	7mer-m8	ccuuuagggacCGUUACACUa	| |||||||||	gcuggagugaaGCAAUGUGAu	0.0476	0.187	5
MIMAT0000078	hsa-miR-23a-3p	ENSG00000247809	NR2F2-AS1	lncRNA	chr15	96232299	96232315	-	0	0	NA	8mer	ccUUUAGGGACCGUUACACUa	|||| || |||||||	uuAAAU--AUG--AAUGUGAa	0.9466	-0.151	9
MIMAT0000078	hsa-miR-23a-3p	ENSG00000247809	NR2F2-AS1	lncRNA	chr15	96266550	96266570	-	0	0	NA	8mer	ccuuUAGGGACCGUUACACUa	|| :: | |||||||	caucAUGUUCAGAAAUGUGAa	0.6515	0.051	9
MIMAT0000078	hsa-miR-23a-3p	ENSG00000247809	NR2F2-AS1	lncRNA	chr15	96286089	96286107	-	1	0	AGO1	8mer	ccuuuagGGACCGUUACACUa	||| :|||||||	uuuugcaCCU--UAAUGUGAa	0.3245	0.713	9
MIMAT0000078	hsa-miR-23a-3p	ENSG00000246465	AC138904.1	lncRNA	chr16	28284935	28284958	-	1	0	AGO2	7mer-m8	ccUUUAGGGACCG---UUACACUa	| ||| |:||| | |||||||	gaAAAACUCUGACAUAAAUGUGAu	1.4088	0.317	13
MIMAT0000078	hsa-miR-23a-3p	ENSG00000261373	VPS9D1-AS1	lncRNA	chr16	89712709	89712729	+	2	0	AGO2	7mer-m8	ccUUUAGGGACCGUUACACUa	|: ||:|||| |||||||	ucAGCUCUCUGGAAAUGUGAc	1.5098	1.735	5
MIMAT0000078	hsa-miR-23a-3p	ENSG00000234327	ZNF232-AS1	lncRNA	chr17	5113649	5113669	+	1	0	AGO2	8mer	ccUUUAGGGACCGUUACACUa	|| ||:: | :|||||||	ugACAUUUAUACUAAUGUGAa	1.1939	0.506	14
MIMAT0000078	hsa-miR-23a-3p	ENSG00000270091	AC015726.1	lncRNA	chr17	19896689	19896709	-	1	0	AGO2	7mer-m8	ccuuUAGGGACCGUUACACUa	:|: || | |||||||	aauuGUUACUUGAAAUGUGAg	0.7944	1.099	14
MIMAT0000078	hsa-miR-23a-3p	ENSG00000266962	AC067852.2	lncRNA	chr17	42553999	42554019	-	3	0	AGO1,AGO2	7mer-m8	ccuuuaGGGACCGUUACACUa	| | | :|||||||	cuggcaCACAGCUAAUGUGAg	0.389	-0.468	9
MIMAT0000078	hsa-miR-23a-3p	ENSG00000267009	AC007780.1	lncRNA	chr17	68515435	68515456	+	8	0	AGO1-4,AGO2	7mer-m8	ccuuUAGGGA-CCGUUACACUa	| ||:| | |||||||	acgcAGCCUUCGAGAAUGUGAg	0.7468	5.26	5
MIMAT0000078	hsa-miR-23a-3p	ENSG00000163597	SNHG16	lncRNA	chr17	76561379	76561403	+	1	0	AGO2	7mer-m8	ccUUUA-GGGACCG---UUACACUa	||:| || || | |||||||	caAAGUGCCAUGUCUUUAAUGUGAg	1.051	-0.788	1
MIMAT0000078	hsa-miR-23a-3p	ENSG00000263731	AC145207.5	lncRNA	chr17	81878646	81878666	-	1	0	AGO1	7mer-m8	ccuuuagggaccgUUACACUa	| | |||||||	aucuacauauaaaAAUGUGAg	0.1765	0.413	8
MIMAT0000078	hsa-miR-23a-3p	ENSG00000259974	LINC00261	lncRNA	chr20	22563507	22563527	-	3	0	AGO1-4	8mer	ccuuuAGGGACCGUUACACUa	|| ||: |:|||||||	gguuuUCUAAUGUAAUGUGAa	1.0243	0.349	10
MIMAT0000078	hsa-miR-23a-3p	ENSG00000250917	AL035458.2	lncRNA	chr20	34281119	34281137	-	1	0	AGO2	8mer	ccuuuaggGACCGUUACACUa	| ||| |||||||	ugggcaagCUG--AAUGUGAa	0.4505	4.701	3
MIMAT0000078	hsa-miR-23a-3p	ENSG00000215424	MCM3AP-AS1	lncRNA	chr21	46234544	46234564	+	0	0	NA	7mer-m8	ccuuuagggaccgUUACACUa	| | |||||||	auucuuaaaagaaAAUGUGAc	0.1177	0.075	7
MIMAT0000078	hsa-miR-23a-3p	ENSG00000215424	MCM3AP-AS1	lncRNA	chr21	46251107	46251127	+	1	0	AGO2	7mer-m8	ccuuuagggacCGUUACACUa	| | |||||||	uuccaguagauGAAAUGUGAc	0.0487	0.173	7
MIMAT0000078	hsa-miR-23a-3p	ENSG00000270022	Z93241.1	lncRNA	chr22	42615290	42615313	+	17	0	AGO1,AGO1-4,AGO2	7mer-m8	ccUUUAGG---GACCGUUACACUa	:||||| ||| :|||||||	ccGAAUCCUCACUGCUAAUGUGAg	1.4453	4.889	4
MIMAT0000078	hsa-miR-23a-3p	ENSG00000229807	XIST	lncRNA	chrX	73826216	73826236	-	17	0	AGO1-4,AGO2	8mer	ccuuuagggaccgUUACACUa	| |||||||	cucucuagagaaaAAUGUGAa	-0.1134	1.1	2
MIMAT0000078	hsa-miR-23a-3p	ENSG00000229807	XIST	lncRNA	chrX	73843265	73843285	-	2	0	AGO1-4,AGO2	8mer	ccuuuaggGACCGUUACACUa	||| :|||||||	cccuuguaCUGUUAAUGUGAa	0.3327	-0.214	2
MIMAT0000078	hsa-miR-23a-3p	ENSG00000229807	XIST	lncRNA	chrX	73844046	73844066	-	0	0	NA	8mer	ccuuuaggGACCGUUACACUa	| | :|||||||	cauuugaaCAGUUAAUGUGAa	0.0807	0.19	2
MIMAT0000078	hsa-miR-23a-3p	ENSG00000229807	XIST	lncRNA	chrX	73847968	73847988	-	13	0	AGO1-4,AGO2	8mer	ccuuuagggaCCGUUACACUa	| | :|||||||	cacuaggauaGUUAAUGUGAa	0.2129	0.181	2
MIMAT0000078	hsa-miR-23a-3p	ENSG00000271533	Z83843.1	lncRNA	chrX	74211859	74211879	-	1	0	AGO2	8mer	ccuuuagggaccgUUACACUa	| | |||||||	ccaguaguguauaAAUGUGAa	0.1311	0.214	7

## Sheet: LncBase
Gene name	miRNA name	Experiments	Publications	Cell Lines	Tissues	miRNA Conf.
AC002347.1	shsa-miR-23a-3p	1	1	1	1	High
AC003988.1	shsa-miR-23a-3p	1	1	1	1	High
AC004158.1	shsa-miR-23a-3p	1	1	0	1	High
AC004477.3	shsa-miR-23a-3p	1	1	1	1	High
AC004542.2	shsa-miR-23a-3p	1	1	1	0	High
AC004817.4	shsa-miR-23a-3p	1	1	2	0	High
AC004944.1	shsa-miR-23a-3p	1	1	1	1	High
AC005261.1	shsa-miR-23a-3p	1	2	1	2	High
AC005332.6	shsa-miR-23a-3p	1	2	1	2	High
AC005498.1	shsa-miR-23a-3p	1	1	0	1	High
AC005845.1	shsa-miR-23a-3p	1	1	0	1	High
AC006058.1	shsa-miR-23a-3p	1	1	0	1	High
AC006213.3	shsa-miR-23a-3p	1	1	0	1	High
AC006288.1	shsa-miR-23a-3p	1	1	1	1	High
AC006504.2	shsa-miR-23a-3p	1	1	1	0	High
AC007673.1	shsa-miR-23a-3p	1	1	0	1	High
AC007785.3	shsa-miR-23a-3p	1	1	0	1	High
AC007922.3	shsa-miR-23a-3p	1	1	0	1	High
AC008124.1	shsa-miR-23a-3p	1	1	0	1	High
AC008269.1	shsa-miR-23a-3p	1	1	0	1	High
AC008543.1	shsa-miR-23a-3p	1	2	1	2	High
AC008808.1	shsa-miR-23a-3p	1	1	1	0	High
AC008938.1	shsa-miR-23a-3p	1	1	1	1	High
AC009812.4	shsa-miR-23a-3p	1	1	1	1	High
AC009961.1	shsa-miR-23a-3p	1	1	0	1	High
AC010198.1	shsa-miR-23a-3p	1	1	2	0	High
AC010198.2	shsa-miR-23a-3p	1	1	0	1	High
AC010207.1	shsa-miR-23a-3p	1	1	1	1	High
AC010735.2	shsa-miR-23a-3p	1	1	0	1	High
AC010889.1	shsa-miR-23a-3p	1	1	0	1	High
AC011978.2	shsa-miR-23a-3p	1	1	0	1	High
AC012291.2	shsa-miR-23a-3p	1	1	0	1	High
AC012313.5	shsa-miR-23a-3p	1	1	1	1	High
AC012511.1	shsa-miR-23a-3p	1	1	0	1	High
AC012557.1	shsa-miR-23a-3p	1	1	0	1	High
AC013402.1	shsa-miR-23a-3p	1	1	1	1	High
AC015813.1	shsa-miR-23a-3p	1	2	1	2	High
AC015922.3	shsa-miR-23a-3p	1	1	1	1	High
AC016205.1	shsa-miR-23a-3p	1	1	1	1	High
AC016687.2	shsa-miR-23a-3p	1	1	0	1	High
AC016717.2	shsa-miR-23a-3p	1	1	0	1	High
AC016737.1	shsa-miR-23a-3p	1	1	1	1	High
AC016831.1	shsa-miR-23a-3p	1	1	0	1	High
AC016831.5	shsa-miR-23a-3p	1	1	0	1	High
AC016831.7	shsa-miR-23a-3p	1	1	0	1	High
AC017002.1	shsa-miR-23a-3p	1	1	1	1	High
AC017053.1	shsa-miR-23a-3p	1	1	1	0	High
AC017076.1	shsa-miR-23a-3p	1	1	0	1	High
AC018647.1	shsa-miR-23a-3p	1	1	0	1	High
AC020661.1	shsa-miR-23a-3p	1	1	1	1	High
AC025031.4	shsa-miR-23a-3p	1	1	0	1	High
AC025165.4	shsa-miR-23a-3p	1	1	1	1	High
AC025175.1	shsa-miR-23a-3p	1	1	0	1	High
AC025442.2	shsa-miR-23a-3p	2	2	2	2	High
AC027020.2	shsa-miR-23a-3p	1	1	0	1	High
AC027031.2	shsa-miR-23a-3p	1	1	0	1	High
AC048341.1	shsa-miR-23a-3p	1	1	1	1	High
AC048341.2	shsa-miR-23a-3p	1	1	0	1	High
AC058791.1	shsa-miR-23a-3p	1	1	1	1	High
AC068620.1	shsa-miR-23a-3p	1	1	0	1	High
AC073071.1	shsa-miR-23a-3p	1	1	1	0	High
AC073365.1	shsa-miR-23a-3p	1	1	0	1	High
AC073530.1	shsa-miR-23a-3p	1	1	1	1	High
AC074135.1	shsa-miR-23a-3p	1	3	1	2	High
AC079922.2	shsa-miR-23a-3p	1	1	0	1	High
AC084030.1	shsa-miR-23a-3p	1	1	1	1	High
AC084032.1	shsa-miR-23a-3p	1	1	0	1	High
AC090164.3	shsa-miR-23a-3p	1	1	0	1	High
AC090204.1	shsa-miR-23a-3p	1	1	0	1	High
AC091078.2	shsa-miR-23a-3p	1	1	1	1	High
AC091196.1	shsa-miR-23a-3p	1	1	0	1	High
AC091806.1	shsa-miR-23a-3p	1	1	1	1	High
AC092162.2	shsa-miR-23a-3p	1	1	1	1	High
AC092279.1	shsa-miR-23a-3p	2	3	3	3	High
AC092634.3	shsa-miR-23a-3p	1	1	0	1	High
AC092747.4	shsa-miR-23a-3p	1	1	1	1	High
AC092910.3	shsa-miR-23a-3p	1	1	1	1	High
AC093297.2	shsa-miR-23a-3p	1	1	0	1	High
AC093523.1	shsa-miR-23a-3p	1	1	0	1	High
AC097105.1	shsa-miR-23a-3p	1	1	0	1	High
AC099062.1	shsa-miR-23a-3p	1	1	1	1	High
AC100836.1	shsa-miR-23a-3p	1	1	1	1	High
AC103808.1	shsa-miR-23a-3p	1	1	1	1	High
AC104964.1	shsa-miR-23a-3p	1	1	0	1	High
AC104964.4	shsa-miR-23a-3p	1	1	0	1	High
AC104986.2	shsa-miR-23a-3p	1	1	0	1	High
AC107068.1	shsa-miR-23a-3p	1	1	0	1	High
AC107214.2	shsa-miR-23a-3p	1	1	0	1	High
AC107952.2	shsa-miR-23a-3p	1	1	0	1	High
AC108749.1	shsa-miR-23a-3p	1	1	0	1	High
AC110491.1	shsa-miR-23a-3p	1	1	0	1	High
AC116565.1	shsa-miR-23a-3p	1	1	0	1	High
AC120036.4	shsa-miR-23a-3p	1	1	0	1	High
AC124045.1	shsa-miR-23a-3p	1	1	1	1	High
AC124312.3	shsa-miR-23a-3p	2	2	1	2	High
AC130650.2	shsa-miR-23a-3p	1	1	0	1	High
AC133540.1	shsa-miR-23a-3p	1	1	1	1	High
AC134312.1	shsa-miR-23a-3p	1	1	0	1	High
AC138035.1	shsa-miR-23a-3p	1	1	1	1	High
AC139099.2	shsa-miR-23a-3p	1	1	1	1	High
AC142472.1	shsa-miR-23a-3p	1	1	1	1	High
AC145207.5	shsa-miR-23a-3p	1	1	0	1	High
AC145422.1	shsa-miR-23a-3p	1	1	0	1	High
AC234772.2	shsa-miR-23a-3p	1	1	0	1	High
AC243960.1	shsa-miR-23a-3p	1	1	0	1	High
AC244517.1	shsa-miR-23a-3p	1	1	0	1	High
AC245014.3	shsa-miR-23a-3p	1	1	1	1	High
AC245060.2	shsa-miR-23a-3p	1	1	1	0	High
AC245060.5	shsa-miR-23a-3p	1	1	0	1	High
AF064858.1	shsa-miR-23a-3p	1	1	0	1	High
AF117829.1	shsa-miR-23a-3p	1	1	0	1	High
AF127577.4	shsa-miR-23a-3p	1	1	1	1	High
AF127936.2	shsa-miR-23a-3p	1	1	2	1	High
AL008638.4	shsa-miR-23a-3p	1	1	1	0	High
AL021155.2	shsa-miR-23a-3p	1	6	4	5	High
AL021368.3	shsa-miR-23a-3p	1	2	2	2	High
AL023574.1	shsa-miR-23a-3p	1	1	1	1	High
AL031056.1	shsa-miR-23a-3p	1	1	0	1	High
AL031768.1	shsa-miR-23a-3p	1	1	0	1	High
AL034422.1	shsa-miR-23a-3p	1	1	1	1	High
AL035420.1	shsa-miR-23a-3p	1	1	1	0	High
AL078590.3	shsa-miR-23a-3p	1	1	0	1	High
AL078601.2	shsa-miR-23a-3p	1	1	0	1	High
AL080317.2	shsa-miR-23a-3p	1	1	1	1	High
AL109910.2	shsa-miR-23a-3p	1	1	1	1	High
AL117190.1	shsa-miR-23a-3p	1	1	0	1	High
AL117329.1	shsa-miR-23a-3p	1	3	2	3	High
AL121890.2	shsa-miR-23a-3p	1	1	0	1	High
AL121999.1	shsa-miR-23a-3p	1	1	0	1	High
AL132657.1	shsa-miR-23a-3p	1	1	1	1	High
AL133325.3	shsa-miR-23a-3p	1	3	2	3	High
AL136115.2	shsa-miR-23a-3p	1	1	0	1	High
AL136379.1	shsa-miR-23a-3p	1	1	1	1	High
AL136439.1	shsa-miR-23a-3p	1	1	1	1	High
AL137003.2	shsa-miR-23a-3p	1	1	0	1	High
AL138889.1	shsa-miR-23a-3p	1	1	1	1	High
AL158211.1	shsa-miR-23a-3p	1	1	0	1	High
AL161729.3	shsa-miR-23a-3p	1	1	1	1	High
AL355677.1	shsa-miR-23a-3p	1	3	3	2	High
AL355834.1	shsa-miR-23a-3p	1	1	1	1	High
AL356488.2	shsa-miR-23a-3p	2	6	5	6	High
AL357054.3	shsa-miR-23a-3p	1	1	0	1	High
AL358334.2	shsa-miR-23a-3p	1	1	0	1	High
AL359851.1	shsa-miR-23a-3p	1	1	1	0	High
AL365181.2	shsa-miR-23a-3p	1	1	1	1	High
AL365361.1	shsa-miR-23a-3p	1	1	0	1	High
AL390728.6	shsa-miR-23a-3p	1	1	0	1	High
AL390955.2	shsa-miR-23a-3p	1	1	1	1	High
AL391056.1	shsa-miR-23a-3p	1	1	1	1	High
AL391832.2	shsa-miR-23a-3p	1	1	1	1	High
AL392183.1	shsa-miR-23a-3p	1	6	11	5	High
AL512413.1	shsa-miR-23a-3p	1	1	1	1	High
AL513329.1	shsa-miR-23a-3p	1	1	1	1	High
AL589740.1	shsa-miR-23a-3p	1	1	0	1	High
AL591222.1	shsa-miR-23a-3p	2	2	2	2	High
AL591501.1	shsa-miR-23a-3p	1	1	2	0	High
AP000766.1	shsa-miR-23a-3p	1	1	1	1	High
AP001065.2	shsa-miR-23a-3p	1	1	1	1	High
AP001330.1	shsa-miR-23a-3p	1	1	0	1	High
AP001505.1	shsa-miR-23a-3p	1	1	1	1	High
AP002360.1	shsa-miR-23a-3p	1	1	0	1	High
AP002360.3	shsa-miR-23a-3p	1	1	0	1	High
AP002884.1	shsa-miR-23a-3p	1	1	1	1	High
AP003392.4	shsa-miR-23a-3p	1	1	0	1	High
AP003419.2	shsa-miR-23a-3p	1	1	1	1	High
AP003469.4	shsa-miR-23a-3p	1	2	1	2	High
ATP2B1-AS1	shsa-miR-23a-3p	1	1	0	1	High
C9orf170	shsa-miR-23a-3p	1	1	1	1	High
CARMN	shsa-miR-23a-3p	1	1	0	1	High
CASC15	shsa-miR-23a-3p	1	1	0	1	High
CYTOR	shsa-miR-23a-3p	1	1	1	1	High
EBLN3P	shsa-miR-23a-3p	1	3	2	3	High
EIF3J-DT	shsa-miR-23a-3p	1	1	0	1	High
EPB41L4A-AS1	shsa-miR-23a-3p	1	1	0	1	High
FAM66A	shsa-miR-23a-3p	1	1	1	1	High
FRG1-DT	shsa-miR-23a-3p	1	1	0	1	High
FTX	shsa-miR-23a-3p	2	4	4	3	High
GIHCG	shsa-miR-23a-3p	1	1	0	1	High
GLIDR	shsa-miR-23a-3p	1	1	0	1	High
GMDS-DT	shsa-miR-23a-3p	1	1	0	1	High
HCG20	shsa-miR-23a-3p	1	1	1	0	High
ILF3-DT	shsa-miR-23a-3p	1	1	0	1	High
IQCH-AS1	shsa-miR-23a-3p	1	2	1	2	High
JPX	shsa-miR-23a-3p	2	2	1	2	High
KCNIP4-IT1	shsa-miR-23a-3p	1	1	0	1	High
LINC00240	shsa-miR-23a-3p	1	1	1	1	High
LINC00294	shsa-miR-23a-3p	1	1	0	1	High
LINC00320	shsa-miR-23a-3p	1	1	0	1	High
LINC00342	shsa-miR-23a-3p	1	1	0	1	High
LINC00350	shsa-miR-23a-3p	1	3	3	3	High
LINC00365	shsa-miR-23a-3p	1	1	1	1	High
LINC00404	shsa-miR-23a-3p	1	1	1	1	High
LINC00472	shsa-miR-23a-3p	1	1	0	1	High
LINC00486	shsa-miR-23a-3p	1	1	0	1	High
LINC00601	shsa-miR-23a-3p	1	1	0	1	High
LINC00630	shsa-miR-23a-3p	1	1	1	1	High
LINC00664	shsa-miR-23a-3p	1	1	0	1	High
LINC00665	shsa-miR-23a-3p	1	1	1	1	High
LINC00667	shsa-miR-23a-3p	1	1	0	1	High
LINC00702	shsa-miR-23a-3p	1	1	1	1	High
LINC00839	shsa-miR-23a-3p	1	1	0	1	High
LINC00841	shsa-miR-23a-3p	1	1	1	1	High
LINC00847	shsa-miR-23a-3p	1	1	0	1	High
LINC00900	shsa-miR-23a-3p	1	1	0	1	High
LINC00907	shsa-miR-23a-3p	1	1	1	0	High
LINC00923	shsa-miR-23a-3p	1	1	1	1	High
LINC00943	shsa-miR-23a-3p	1	2	1	1	High
LINC00960	shsa-miR-23a-3p	1	1	1	1	High
LINC00997	shsa-miR-23a-3p	1	1	1	1	High
LINC01006	shsa-miR-23a-3p	1	1	0	1	High
LINC01068	shsa-miR-23a-3p	1	1	1	1	High
LINC01089	shsa-miR-23a-3p	1	1	1	1	High
LINC01094	shsa-miR-23a-3p	1	1	0	1	High
LINC01116	shsa-miR-23a-3p	1	1	0	1	High
LINC01132	shsa-miR-23a-3p	1	1	1	1	High
LINC01135	shsa-miR-23a-3p	1	1	0	1	High
LINC01202	shsa-miR-23a-3p	1	1	0	1	High
LINC01268	shsa-miR-23a-3p	1	1	0	1	High
LINC01303	shsa-miR-23a-3p	1	2	2	2	High
LINC01354	shsa-miR-23a-3p	1	1	0	1	High
LINC01355	shsa-miR-23a-3p	1	1	1	1	High
LINC01378	shsa-miR-23a-3p	1	1	0	1	High
LINC01562	shsa-miR-23a-3p	1	1	0	1	High
LINC01600	shsa-miR-23a-3p	1	1	0	1	High
LINC01605	shsa-miR-23a-3p	1	1	1	1	High
LINC01630	shsa-miR-23a-3p	1	1	0	1	High
LINC01641	shsa-miR-23a-3p	1	1	1	1	High
LINC01650	shsa-miR-23a-3p	1	1	1	1	High
LINC01727	shsa-miR-23a-3p	1	1	1	1	High
LINC01748	shsa-miR-23a-3p	1	1	0	1	High
LINC01771	shsa-miR-23a-3p	1	1	1	1	High
LINC01772	shsa-miR-23a-3p	1	1	1	1	High
LINC01788	shsa-miR-23a-3p	1	1	1	1	High
LINC01797	shsa-miR-23a-3p	1	1	0	1	High
LINC01806	shsa-miR-23a-3p	1	1	1	1	High
LINC01817	shsa-miR-23a-3p	1	1	1	1	High
LINC01837	shsa-miR-23a-3p	1	1	0	1	High
LINC01902	shsa-miR-23a-3p	1	1	0	1	High
LINC01934	shsa-miR-23a-3p	1	1	1	1	High
LINC01954	shsa-miR-23a-3p	1	1	0	1	High
LINC01963	shsa-miR-23a-3p	1	1	0	1	High
LINC02001	shsa-miR-23a-3p	2	2	2	2	High
LINC02035	shsa-miR-23a-3p	1	1	0	1	High
LINC02135	shsa-miR-23a-3p	1	1	1	1	High
LINC02234	shsa-miR-23a-3p	1	1	0	1	High
LINC02344	shsa-miR-23a-3p	1	1	1	1	High
LINC02389	shsa-miR-23a-3p	1	1	0	1	High
LINC02421	shsa-miR-23a-3p	1	1	1	1	High
LINC02427	shsa-miR-23a-3p	1	1	0	1	High
LINC02449	shsa-miR-23a-3p	1	1	0	1	High
LINC02518	shsa-miR-23a-3p	1	1	1	1	High
LINC02580	shsa-miR-23a-3p	1	1	1	1	High
LINC02604	shsa-miR-23a-3p	1	1	1	1	High
LINC02605	shsa-miR-23a-3p	1	1	1	1	High
LINC02607	shsa-miR-23a-3p	1	1	0	1	High
LINC02656	shsa-miR-23a-3p	1	1	1	1	High
MALAT1	shsa-miR-23a-3p	2	11	13	8	High
MAPKAPK5-AS1	shsa-miR-23a-3p	2	3	2	2	High
MEG3	shsa-miR-23a-3p	1	2	1	2	High
MEG8	shsa-miR-23a-3p	1	1	0	1	High
MIAT	shsa-miR-23a-3p	1	1	0	1	High
MIR137HG	shsa-miR-23a-3p	1	1	0	1	High
MIR181A1HG	shsa-miR-23a-3p	1	1	0	1	High
MIR222HG	shsa-miR-23a-3p	1	1	1	1	High
MIR22HG	shsa-miR-23a-3p	1	1	0	1	High
MIR29B2CHG	shsa-miR-23a-3p	1	2	1	2	High
MIR4458HG	shsa-miR-23a-3p	1	1	0	1	High
MIR9-3HG	shsa-miR-23a-3p	1	2	1	2	High
MIR99AHG	shsa-miR-23a-3p	1	1	0	1	High
MIRLET7BHG	shsa-miR-23a-3p	1	1	1	1	High
MUC20-OT1	shsa-miR-23a-3p	1	1	0	1	High
NAMA	shsa-miR-23a-3p	1	1	1	1	High
NEAT1	shsa-miR-23a-3p	2	9	9	8	High
NKAIN3-IT1	shsa-miR-23a-3p	1	1	0	1	High
NORAD	shsa-miR-23a-3p	2	3	4	3	High
OLMALINC	shsa-miR-23a-3p	1	1	0	1	High
OSMR-AS1	shsa-miR-23a-3p	1	1	0	1	High
PART1	shsa-miR-23a-3p	1	1	0	1	High
PPM1K-DT	shsa-miR-23a-3p	1	1	0	1	High
PVT1	shsa-miR-23a-3p	1	1	1	1	High
RAMP2-AS1	shsa-miR-23a-3p	1	1	1	1	High
RFX3-AS1	shsa-miR-23a-3p	1	1	0	1	High
SCAMP1-AS1	shsa-miR-23a-3p	1	1	1	1	High
SND1-IT1	shsa-miR-23a-3p	1	2	1	2	High
SNHG25	shsa-miR-23a-3p	1	1	1	1	High
SNHG8	shsa-miR-23a-3p	1	2	2	2	High
SUCLG2-AS1	shsa-miR-23a-3p	1	2	2	2	High
TEX41	shsa-miR-23a-3p	2	3	2	3	High
TMEM202-AS1	shsa-miR-23a-3p	1	1	1	1	High
TTTY14	shsa-miR-23a-3p	1	1	0	1	High
U91328.1	shsa-miR-23a-3p	1	2	1	2	High
XIST	shsa-miR-23a-3p	1	1	1	1	High
Z93241.1	shsa-miR-23a-3p	2	11	12	10	High
ZNF30-AS1	shsa-miR-23a-3p	1	1	0	1	High
ZNF426-DT	shsa-miR-23a-3p	1	1	0	1	High
ZNF582-AS1	shsa-miR-23a-3p	1	1	0	1	High
ZNF667-AS1	shsa-miR-23a-3p	1	1	0	1	High
