# Supplementary material for: Bioinformatics analysis of neutrophil-associated hub genes and ceRNA network construction in septic cardiomyopathy
Source: Aging (Albany NY). 2024 Aug 30;16(19):12833–49. doi: 10.18632/aging.206092 (PMC11501391; doi:10.18632/aging.206092)
Supplement: Supplementary Table 6 [file aging-16-206092-s007.xlsx]

## Sheet: DGGs of GSE217700
Supplementary Table 6. The differentially expressed lncRNAs of GSE217700.
id	logFC	AveExpr	t	P.Value	adj.P.Val	B
AC104389.2	-6.57249	3.28625	-89.5755	3.47245e-11	5.50209e-07	14.8389
AL133485.3	1.66975	0.834874	72.0468	1.40343e-10	1.11187e-06	14.1654
AC098588.3	-8.49637	4.24818	-57.5115	5.94983e-10	3.1425e-06	13.2863
AC012363.2	3.4284	1.7142	47.5828	2.00324e-09	6.16629e-06	12.4066
AC109460.3	-4.26472	5.86983	-46.6577	2.27156e-09	6.16629e-06	12.3086
AC130456.3	-10.7535	5.37676	-46.2215	2.41238e-09	6.16629e-06	12.2613
TRBV11-2	-6.59972	3.29986	-45.3523	2.72414e-09	6.16629e-06	12.1648
AC022167.2	-2.59723	4.63617	-41.2667	4.98439e-09	9.87221e-06	11.6686
AL672310.1	3.60339	1.80169	39.5099	6.58378e-09	1.15911e-05	11.4312
AC132872.3	5.42473	6.35756	37.1804	9.71048e-09	1.53863e-05	11.091
LINC00853	-3.68489	1.84244	-35.7696	1.24344e-08	1.79112e-05	10.8695
SNHG8	-3.8354	5.41451	-33.3783	1.93469e-08	2.5546e-05	10.4642
AC118658.1	3.53034	4.74192	32.3592	2.35833e-08	2.87445e-05	10.279
AL158066.1	-2.75069	2.8738	-31.3121	2.90937e-08	3.14482e-05	10.0804
LINC00944	-2.8702	1.4396	-31.1046	3.03545e-08	3.14482e-05	10.04
UBA6-AS1	-3.13989	2.4723	-30.8854	3.17558e-08	3.14482e-05	9.99686
AC016831.5	5.04386	2.56948	30.1657	3.69114e-08	3.31098e-05	9.85245
AC011825.3	-3.71314	6.25886	-30.0768	3.76129e-08	3.31098e-05	9.83429
AC002094.1	-1.68075	5.4924	-28.6991	5.07224e-08	4.22998e-05	9.5437
AL359182.1	3.18303	1.59152	27.8914	6.08451e-08	4.6098e-05	9.36483
AC064805.2	3.68333	1.84166	27.8735	6.10955e-08	4.6098e-05	9.36078
AC009133.5	-2.2463	6.07099	-27.0847	7.33575e-08	4.9702e-05	9.17947
AC009301.1	3.86001	1.93	26.994	7.49408e-08	4.9702e-05	9.15821
LINC00920	-3.40495	1.71517	-26.9198	7.62669e-08	4.9702e-05	9.14073
AP002478.1	-2.75826	1.37913	-26.8024	7.8419e-08	4.9702e-05	9.11298
LINC02084	-5.64716	3.09672	-26.1951	9.07408e-08	5.4662e-05	8.96689
AC244093.3	3.94761	1.9738	25.8828	9.79415e-08	5.4662e-05	8.8901
AL445363.3	-1.40895	6.4754	-25.8165	9.95543e-08	5.4662e-05	8.87365
LINC02772	-7.09269	3.54635	-25.7949	1.00086e-07	5.4662e-05	8.86828
AC132872.4	6.2498	5.3027	25.6595	1.03494e-07	5.4662e-05	8.83451
AC079915.1	3.08954	1.58487	25.457	1.08846e-07	5.56344e-05	8.78357
LINC01550	-3.63418	2.38354	-24.9159	1.24791e-07	6.17909e-05	8.64498
FAM111A-DT	-3.5917	2.55375	-24.2254	1.49214e-07	7.16451e-05	8.46272
PDE2A-AS2	-3.81146	1.90573	-23.6852	1.72212e-07	7.91074e-05	8.31572
DSCAS	3.26274	1.63137	23.6309	1.7474e-07	7.91074e-05	8.30074
UBE2R2-AS1	1.75052	0.875261	23.2053	1.9613e-07	8.63244e-05	8.18175
LINC01278	-2.28969	2.33726	-22.8652	2.15413e-07	9.2249e-05	8.08479
H1-10-AS1	-1.17876	2.50937	-22.5684	2.34044e-07	9.75901e-05	7.99878
PCED1B-AS1	-4.21351	5.80481	-22.1409	2.64251e-07	0.000107361	7.87252
GAS5	-3.62687	5.50154	-21.9163	2.81915e-07	0.000111674	7.80503
IATPR	-3.1504	1.5752	-21.8194	2.89951e-07	0.000112056	7.77568
SNHG10	-3.56488	3.26315	-21.6402	3.05527e-07	0.000114815	7.72096
CKMT2-AS1	-2.72777	2.15515	-21.5271	3.15847e-07	0.000114815	7.68619
HYMAI	2.97187	2.37941	21.4952	3.18829e-07	0.000114815	7.67634
AC027801.2	2.07781	1.07871	21.1276	3.55685e-07	0.000125241	7.56157
AC112220.2	1.29131	1.58007	20.8001	3.92703e-07	0.000135269	7.45738
LINC00570	-6.6299	3.31495	-20.4761	4.3377e-07	0.000144001	7.35245
LINC01001	4.62066	5.11623	20.4308	4.39887e-07	0.000144001	7.33766
LINC00513	4.15157	2.07578	20.3913	4.45316e-07	0.000144001	7.32469
TERC	-3.72191	8.13223	-20.2398	4.66855e-07	0.000145978	7.27473
AP000943.3	4.28134	2.14067	20.1443	4.81045e-07	0.000145978	7.24303
AL356488.2	-2.23743	12.5477	-20.1087	4.86456e-07	0.000145978	7.23118
AC055860.1	-3.89177	4.86555	-20.0646	4.93272e-07	0.000145978	7.21644
AC005224.3	3.66882	5.6067	20.0001	5.03426e-07	0.000145978	7.19484
MDS2	-2.70547	1.35273	-19.9488	5.11674e-07	0.000145978	7.17761
AC005670.3	-2.58255	2.70555	-19.9228	5.1592e-07	0.000145978	7.16884
AC127526.2	-4.7045	2.35225	-19.852	5.27666e-07	0.000146052	7.14495
AC073111.2	-3.8906	4.04156	-19.8059	5.35489e-07	0.000146052	7.12932
GTSCR1	-3.37816	1.68908	-19.7328	5.48169e-07	0.000146052	7.10446
AC022762.1	2.93234	1.5586	19.5934	5.73315e-07	0.000146052	7.05678
MUC5B-AS1	4.0216	2.0108	19.5779	5.76193e-07	0.000146052	7.05146
AC009630.2	2.27132	1.13566	19.4645	5.97754e-07	0.000146052	7.01236
BX890604.1	-5.14687	3.46279	-19.454	5.99808e-07	0.000146052	7.00871
LINC02361	-3.87701	3.7127	-19.4153	6.07411e-07	0.000146052	6.99529
LINC00628	1.68228	0.885065	19.4105	6.08358e-07	0.000146052	6.99364
TRG-AS1	-4.42896	4.05766	-19.3506	6.20362e-07	0.000146711	6.97282
AP001372.2	-3.40725	1.90018	-19.2874	6.3334e-07	0.000147578	6.95075
AC022001.2	3.3963	1.69815	18.9624	7.05155e-07	0.00016193	6.8361
AL050343.2	2.75295	2.52823	18.7645	7.53489e-07	0.000168097	6.7652
AP000892.4	2.23736	1.58687	18.7209	7.64648e-07	0.000168097	6.74946
AC092068.1	1.96218	0.981088	18.6605	7.8041e-07	0.000168097	6.72761
LINC02604	2.9922	2.36937	18.6436	7.84883e-07	0.000168097	6.72149
TMEM147-AS1	-3.39335	3.20352	-18.6361	7.86883e-07	0.000168097	6.71877
CEROX1	-3.97978	2.1344	-18.6034	7.95665e-07	0.000168097	6.70688
AC141586.4	2.8234	3.45685	18.4923	8.2635e-07	0.000172283	6.66631
AC130895.1	1.65048	4.95692	18.3925	8.55067e-07	0.00017433	6.62967
COX10-AS1	-2.86697	2.22792	-18.3655	8.63027e-07	0.00017433	6.61972
AC007036.3	-4.28527	5.86297	-18.3449	8.69176e-07	0.00017433	6.6121
AC100810.1	-5.66282	5.68182	-18.056	9.60759e-07	0.000187674	6.50445
MALAT1	2.00727	12.6628	18.0401	9.66113e-07	0.000187674	6.49847
LINC00861	-5.24735	4.14061	-17.9978	9.80529e-07	0.000187674	6.48253
LINC02656	5.57107	5.27748	17.9904	9.83082e-07	0.000187674	6.47974
AC025300.1	3.13775	1.6692	17.9368	1.00176e-06	0.000188964	6.45947
FAM157C	3.80336	7.53744	17.8733	1.02443e-06	0.000190966	6.43538
AL359878.2	1.79681	0.898407	17.7346	1.07601e-06	0.000194338	6.38245
LINC01806	-2.65113	2.62253	-17.7177	1.08251e-06	0.000194338	6.37595
SCAT1	1.20959	1.4907	17.6799	1.09717e-06	0.000194338	6.36145
ILF3-DT	-3.03145	5.2451	-17.6772	1.09825e-06	0.000194338	6.36038
STX18-IT1	2.14862	1.15848	17.6629	1.10385e-06	0.000194338	6.3549
AC110769.3	4.27085	3.92583	17.4721	1.18208e-06	0.000204278	6.28099
AC245033.4	-3.83974	8.50149	-17.4627	1.18609e-06	0.000204278	6.27733
RPARP-AS1	-3.36412	3.29955	-17.3348	1.24231e-06	0.000211661	6.22729
Z94721.2	-2.35067	4.50324	-17.2786	1.268e-06	0.000213739	6.20516
AC243960.1	-5.17376	3.87504	-17.2409	1.28559e-06	0.000214423	6.19026
AC008124.1	-2.41765	3.67578	-17.0276	1.39045e-06	0.000229497	6.10538
AC115284.1	-5.10209	2.79558	-16.9846	1.41274e-06	0.000230772	6.08815
LINC01270	3.69279	5.43859	16.9141	1.45024e-06	0.00023448	6.05976
AC092652.2	1.76138	5.27871	16.8251	1.49917e-06	0.000239943	6.02377
AL360181.1	-3.67943	1.83972	-16.763	1.53446e-06	0.000241746	5.99853
LINC02325	-3.28393	1.90336	-16.7518	1.54095e-06	0.000241746	5.99395
AC009127.1	3.34838	1.67419	16.6885	1.57812e-06	0.000243801	5.96807
ZNF582-AS1	-2.27319	1.27672	-16.6772	1.58482e-06	0.000243801	5.96348
LINC00667	-2.75082	3.40918	-16.5698	1.65058e-06	0.000249151	5.91932
AC087627.1	1.25676	0.628381	16.5423	1.66793e-06	0.000249151	5.90795
AC010327.6	-1.60987	6.8808	-16.5418	1.66824e-06	0.000249151	5.90775
RASA3-IT1	3.42033	1.71016	16.5194	1.6825e-06	0.000249151	5.8985
AC016747.4	-3.04947	4.70586	-16.3381	1.80343e-06	0.000263246	5.82302
TMEM161B-AS1	-3.08739	3.30891	-16.3273	1.8109e-06	0.000263246	5.81852
LINC01259	-4.73101	2.3655	-16.2968	1.83236e-06	0.000263763	5.8057
AL109840.2	1.88493	1.04262	16.2751	1.84776e-06	0.000263763	5.79659
AC099063.4	-2.97499	1.48749	-16.2465	1.86825e-06	0.000264307	5.78459
LINC01089	-1.81267	5.15414	-16.1939	1.90677e-06	0.00026737	5.76236
AC072039.2	1.22199	0.610997	16.1638	1.92919e-06	0.000267713	5.74963
AC078852.1	3.79114	2.09707	16.1416	1.94588e-06	0.000267713	5.74024
AC068724.4	-8.60788	4.71554	-16.1232	1.95991e-06	0.000267713	5.73242
AC008966.1	-1.97339	0.986695	-16.0886	1.98648e-06	0.000269024	5.71774
AC006033.2	-4.60542	3.42357	-16.0392	2.02531e-06	0.000271957	5.69665
AC010619.2	-4.72943	5.2746	-15.9838	2.06976e-06	0.000274529	5.67297
SNHG16	-1.69443	5.97433	-15.9611	2.08831e-06	0.000274529	5.66324
AC090617.1	2.60926	1.45004	15.9512	2.09644e-06	0.000274529	5.659
SLC5A4-AS1	-4.42736	2.3783	-15.8906	2.14722e-06	0.000275881	5.63289
LINC00402	-4.77402	3.4152	-15.889	2.14854e-06	0.000275881	5.63222
AL050341.2	-1.9449	4.46261	-15.8767	2.159e-06	0.000275881	5.62693
BMS1P4-AGAP5	-2.8412	4.2166	-15.813	2.21419e-06	0.000279165	5.59937
AL353796.1	-1.10937	0.701285	-15.8065	2.21993e-06	0.000279165	5.59655
AL359220.1	-3.01548	1.67804	-15.7019	2.31438e-06	0.000288751	5.55104
LINC01891	-4.17947	2.08973	-15.6243	2.38744e-06	0.000295019	5.51708
PINK1-AS	-2.12882	4.34221	-15.5973	2.41348e-06	0.000295019	5.50523
LINC02328	-2.93399	1.99698	-15.5759	2.43437e-06	0.000295019	5.49581
AL391001.1	-4.67327	2.6326	-15.5711	2.4391e-06	0.000295019	5.49368
AC073046.1	1.41562	7.07506	15.3396	2.67927e-06	0.000321614	5.39094
AC069410.1	-8.16947	4.59705	-15.2704	2.75639e-06	0.000328384	5.35986
AC107993.1	2.44789	1.34092	15.2226	2.81109e-06	0.000332401	5.33834
AL096870.2	-1.37916	6.18115	-15.1623	2.88183e-06	0.000336914	5.3111
DHRS4-AS1	-3.13247	3.01457	-15.1539	2.89179e-06	0.000336914	5.30732
AL133245.1	3.02802	4.14861	15.1003	2.95681e-06	0.000341228	5.28295
LINC01801	-2.08066	1.1804	-15.088	2.97188e-06	0.000341228	5.27738
AL355581.1	-4.58625	2.98336	-15.0647	3.00078e-06	0.000342067	5.26677
AC073529.1	-4.20862	2.16033	-15.0232	3.05314e-06	0.000343968	5.24779
CERNA1	-2.67585	1.54646	-15.0171	3.06087e-06	0.000343968	5.24502
AC022916.1	-3.26015	3.5538	-14.9479	3.15073e-06	0.000351573	5.21328
AC100827.4	1.80408	1.63041	14.9238	3.18272e-06	0.000352658	5.20219
AC233976.1	-3.88189	1.94094	-14.7887	3.36912e-06	0.00037072	5.13971
AC074091.2	-2.61791	5.59432	-14.7533	3.42006e-06	0.000371437	5.12322
AC135782.1	1.91787	0.958936	14.7442	3.43325e-06	0.000371437	5.119
AC091769.1	3.93764	1.96882	14.7217	3.46622e-06	0.000371437	5.10849
TFAP2E-AS1	-3.88312	3.5044	-14.7185	3.47084e-06	0.000371437	5.10703
AC093525.10	3.03751	3.8462	14.6974	3.50216e-06	0.000371437	5.09716
AC012321.1	1.98604	5.66268	14.688	3.51629e-06	0.000371437	5.09274
LINC02596	6.38509	5.67573	14.6232	3.61484e-06	0.000377307	5.06236
AF131215.6	-2.29153	2.60051	-14.6202	3.61948e-06	0.000377307	5.06095
AL137782.1	-2.50909	3.9671	-14.6025	3.64699e-06	0.00037769	5.05262
CACNA1C-AS1	-3.27672	1.96093	-14.5741	3.69162e-06	0.000378128	5.03925
AC026310.2	3.10683	1.5853	14.5695	3.69895e-06	0.000378128	5.03707
AC068205.2	-1.49439	3.54303	-14.5118	3.79192e-06	0.000385147	5.00977
AC012615.1	-1.86037	5.18338	-14.4712	3.85894e-06	0.000389458	4.99049
AC002470.2	-2.83923	5.47908	-14.4317	3.92538e-06	0.000393656	4.97171
AL359880.1	2.48268	1.24134	14.362	4.0459e-06	0.00040319	4.93843
AL138955.1	3.24108	3.84937	14.3275	4.1072e-06	0.000405362	4.92187
AL353795.3	2.73062	3.50697	14.321	4.11886e-06	0.000405362	4.91875
AL139021.1	2.22399	1.112	14.2829	4.18799e-06	0.000407648	4.90042
NIPBL-DT	-1.60377	4.39576	-14.2799	4.19354e-06	0.000407648	4.89896
AC010335.3	3.8229	4.73235	14.2467	4.2549e-06	0.000408349	4.88296
AL662884.2	-1.21036	7.89559	-14.2464	4.25548e-06	0.000408349	4.88281
AC011933.2	2.94275	5.63704	14.2247	4.29619e-06	0.000408349	4.87232
AL022311.1	-2.10064	4.1294	-14.2206	4.30384e-06	0.000408349	4.87036
AC020978.7	-2.00393	5.80591	-14.1481	4.44351e-06	0.000412165	4.83517
AC026362.1	-2.46623	5.94486	-14.1471	4.44545e-06	0.000412165	4.83469
Z95114.3	-2.94644	2.33947	-14.1311	4.47699e-06	0.000412165	4.82689
AC105036.3	-1.79049	4.1763	-14.1311	4.477e-06	0.000412165	4.82689
AL162586.1	-4.00984	2.92392	-14.123	4.493e-06	0.000412165	4.82296
LINC02273	-5.11425	3.56015	-14.1176	4.50374e-06	0.000412165	4.82033
AF131215.5	-2.62318	3.19672	-14.1064	4.52614e-06	0.000412165	4.81486
PAXIP1-DT	-2.69655	3.58818	-14.0824	4.57441e-06	0.00041418	4.80316
AC090907.2	2.40312	1.33847	14.0425	4.65622e-06	0.000419192	4.78362
AC008760.1	-4.40691	2.42537	-14.0107	4.7226e-06	0.000422766	4.76801
SNHG22	-3.60511	6.20808	-13.9424	4.86877e-06	0.000433403	4.73438
AL731577.2	-2.48646	8.33362	-13.8904	4.98357e-06	0.000441143	4.70866
AC046185.3	-2.84913	5.85317	-13.8447	5.08706e-06	0.000446816	4.68598
AC009951.4	2.84391	6.74953	13.8344	5.11081e-06	0.000446816	4.68084
AC109326.1	-3.4047	6.00939	-13.8146	5.15645e-06	0.000446816	4.67102
LINC02709	1.81322	0.994675	13.8129	5.16045e-06	0.000446816	4.67016
ZNF213-AS1	-2.37426	3.18428	-13.7888	5.21707e-06	0.000449264	4.65812
AC008676.1	3.39747	1.86424	13.7454	5.32052e-06	0.000455696	4.63643
STAG3L5P-PVRIG2P-PILRB	-2.13687	7.2652	-13.7184	5.38603e-06	0.000458245	4.62291
AC138207.4	2.94753	3.98871	13.7094	5.40813e-06	0.000458245	4.61839
AC132938.5	3.14123	6.00519	13.5724	5.75742e-06	0.000485247	4.54923
ANKRD44-AS1	-5.96675	2.98337	-13.5444	5.832e-06	0.000488932	4.535
TP53TG1	-2.48539	3.65036	-13.5305	5.86935e-06	0.000489473	4.52794
Z68871.1	-2.65075	1.51727	-13.48	6.00769e-06	0.000498386	4.50218
LIPC-AS1	3.18357	1.82555	13.4261	6.15949e-06	0.00050489	4.47458
AC009716.2	3.69014	3.71018	13.4254	6.16131e-06	0.00050489	4.47425
AC008555.4	-4.78156	3.36232	-13.4183	6.18168e-06	0.00050489	4.4706
PPP4R3B-DT	-2.08668	5.38875	-13.3624	6.34433e-06	0.000513055	4.44187
AC093227.1	-2.11519	1.0576	-13.3617	6.3464e-06	0.000513055	4.44151
AC131009.4	3.69037	5.86847	13.3414	6.40689e-06	0.000515316	4.43101
LINC02731	-1.93625	1.15255	-13.2479	6.69337e-06	0.000535639	4.38258
AC010333.2	3.48928	1.74464	13.2245	6.76728e-06	0.000537924	4.37043
AL359740.1	2.91132	1.45566	13.2162	6.79363e-06	0.000537924	4.36612
LINC00892	-3.72976	2.23062	-13.2068	6.82378e-06	0.000537924	4.36122
AC127024.8	2.17126	3.3119	13.1853	6.89345e-06	0.000538375	4.34997
AC079316.2	2.69247	5.34606	13.184	6.89746e-06	0.000538375	4.34932
AC040162.3	-1.15307	4.34723	-13.1432	7.03167e-06	0.000538871	4.32798
LEF1-AS1	-3.33881	1.71468	-13.1344	7.06123e-06	0.000538871	4.32333
EPB41L4A-AS1	-3.35167	3.79979	-13.1309	7.07297e-06	0.000538871	4.32149
AC092490.1	-8.4791	5.99838	-13.1281	7.08237e-06	0.000538871	4.32002
RBM38-AS1	-1.86111	2.53587	-13.1149	7.12659e-06	0.000538871	4.31312
AC008764.10	4.39252	3.40531	13.1104	7.14187e-06	0.000538871	4.31075
AC004584.3	3.15647	2.70571	13.0904	7.20986e-06	0.000541423	4.30025
AC022167.3	-6.33527	3.88416	-13.0538	7.33634e-06	0.000548322	4.28098
Z97989.1	-1.89623	2.36059	-13.0219	7.44885e-06	0.000554118	4.26411
SNHG17	-1.63823	3.66405	-12.9486	7.71467e-06	0.00057121	4.22524
AC009121.2	3.88172	1.94086	12.9314	7.77873e-06	0.000573274	4.21607
SNHG14	-2.4213	1.82382	-12.8797	7.97455e-06	0.000584985	4.1885
AC011379.1	3.93311	3.43431	12.8693	8.01453e-06	0.000585208	4.18295
SMILR	-3.33715	1.80749	-12.8598	8.0516e-06	0.000585218	4.17783
AC017104.1	-2.36343	1.18172	-12.8228	8.19674e-06	0.000593048	4.15801
AC022150.4	-3.03891	3.4809	-12.8117	8.24078e-06	0.000593524	4.15207
PRKCQ-AS1	-4.09292	4.02158	-12.7761	8.38436e-06	0.000601132	4.1329
AC004918.3	-3.7914	4.31423	-12.7474	8.50233e-06	0.000605052	4.11739
AC009133.3	-2.63202	3.73658	-12.7442	8.51541e-06	0.000605052	4.11569
FLJ42393	2.6434	2.8635	12.7349	8.55412e-06	0.000605089	4.11066
ADAMTSL4-AS1	2.06003	7.85011	12.6886	8.74975e-06	0.000615177	4.08556
COL4A2-AS1	3.1867	1.59335	12.6828	8.77438e-06	0.000615177	4.08243
AL035458.2	-2.3713	3.55042	-12.6395	8.96236e-06	0.000624872	4.0589
LINC02295	-5.13436	2.56718	-12.6329	8.99154e-06	0.000624872	4.05529
AL133481.1	3.02737	1.51369	12.5749	9.25182e-06	0.000640153	4.0236
AC018521.1	-1.45306	7.97528	-12.5405	9.41015e-06	0.000648278	4.00475
LINC00954	-1.5898	2.76298	-12.4882	9.65697e-06	0.000662402	3.97598
AC027097.2	-2.3494	3.18514	-12.4778	9.70733e-06	0.000662985	3.9702
AP001189.3	-4.45618	2.22809	-12.4471	9.8564e-06	0.000670278	3.95327
AC140134.1	3.0107	1.77931	12.4216	9.98214e-06	0.000675927	3.93918
LINC00989	-5.27614	3.88862	-12.3994	1.00936e-05	0.000678118	3.92684
BASP1-AS1	3.81119	2.8484	12.3981	1.01001e-05	0.000678118	3.92612
AC133644.2	-1.68783	5.3754	-12.3813	1.01855e-05	0.000680966	3.91676
AC021683.5	-2.70583	1.35292	-12.3367	1.04156e-05	0.000693426	3.89192
AL133342.1	1.96164	6.9672	12.2975	1.06227e-05	0.000702989	3.87003
AL357079.1	-2.8224	1.4112	-12.2878	1.06746e-05	0.000702989	3.86461
C9orf106	3.46915	3.67831	12.2817	1.07074e-05	0.000702989	3.8612
LMNTD2-AS1	-3.2826	1.86559	-12.2763	1.07367e-05	0.000702989	3.85816
LINC00862	3.97095	3.18803	12.2602	1.0824e-05	0.000705784	3.84916
ARRDC1-AS1	-2.28734	4.30383	-12.2497	1.08817e-05	0.000705964	3.84324
AL590560.3	-2.66311	1.3351	-12.2425	1.09215e-05	0.000705964	3.83918
AC135050.5	1.02527	6.4055	12.2349	1.09635e-05	0.000705964	3.83491
BX284668.4	-3.38536	3.57548	-12.2274	1.10049e-05	0.000705964	3.83071
AC007342.4	-4.07424	3.53276	-12.1864	1.12363e-05	0.0007179	3.80757
AC109927.2	3.36957	1.68479	12.1748	1.13021e-05	0.000718973	3.80107
AC005332.4	-3.72283	4.14719	-12.1633	1.13688e-05	0.000718973	3.79452
NAPA-AS1	-2.07664	2.64508	-12.1546	1.14188e-05	0.000718973	3.78964
AL050343.3	2.38388	1.19194	12.1519	1.14346e-05	0.000718973	3.7881
AC004846.2	2.12321	6.11805	12.1314	1.15545e-05	0.000723639	3.77649
WDR11-AS1	-3.59204	2.05457	-12.1192	1.16266e-05	0.000725291	3.76957
LINC02649	4.59877	5.58694	12.0866	1.18218e-05	0.000734576	3.75104
AC012676.5	3.08325	4.00481	12.0783	1.18723e-05	0.000734829	3.7463
AC008105.2	-2.26725	6.26432	-12.0483	1.20562e-05	0.000737497	3.72918
AC087672.2	4.31135	2.77021	12.0473	1.20625e-05	0.000737497	3.7286
KANSL1L-AS1	-1.63866	3.36776	-12.0447	1.20786e-05	0.000737497	3.72712
AC099550.1	3.21174	2.73332	12.0313	1.21621e-05	0.000737497	3.71944
KCNQ1OT1	1.56117	1.17935	12.0268	1.21901e-05	0.000737497	3.71689
ATP6V0E2-AS1	-4.04539	2.22024	-12.023	1.22138e-05	0.000737497	3.71472
AC139834.1	2.96927	1.7586	12.0186	1.22412e-05	0.000737497	3.71223
AL031432.4	-1.64263	2.54463	-11.9424	1.2732e-05	0.000763194	3.66845
AC004812.2	-2.45947	2.53625	-11.9327	1.27962e-05	0.000763194	3.66285
AC005264.1	2.6299	1.69445	11.9303	1.28122e-05	0.000763194	3.66146
LINC02818	2.56169	1.28085	11.9225	1.28636e-05	0.000763383	3.657
ARHGAP26-IT1	2.10549	5.23245	11.9024	1.29983e-05	0.000768502	3.64539
AC007278.2	5.3605	5.85797	11.858	1.33017e-05	0.000780401	3.61969
AC005329.1	-2.35416	1.36105	-11.8514	1.33473e-05	0.000780401	3.61587
NNT-AS1	-2.31929	1.78965	-11.813	1.36178e-05	0.000793286	3.59352
AC009041.1	-3.06129	1.53065	-11.7997	1.37125e-05	0.00079588	3.5858
AC135586.2	-2.9652	1.70262	-11.7831	1.3832e-05	0.000797243	3.57613
KTN1-AS1	-1.00083	0.629368	-11.7825	1.38367e-05	0.000797243	3.57575
AL139424.2	4.15083	2.64023	11.7374	1.4168e-05	0.000813092	3.54938
AL132708.1	2.44283	1.22142	11.7312	1.42143e-05	0.000813092	3.54574
AC116021.1	2.93516	1.46758	11.6899	1.45265e-05	0.000827814	3.52152
AL137230.2	-1.32145	6.28257	-11.6834	1.45762e-05	0.000827814	3.51771
AC092919.2	-3.43468	1.89187	-11.6552	1.47952e-05	0.000836402	3.50109
IL10RB-DT	2.54631	3.14729	11.6504	1.4833e-05	0.000836402	3.49824
AC100835.2	-6.51068	3.89805	-11.6365	1.49426e-05	0.000837081	3.49003
C1RL-AS1	1.69879	5.24965	11.6354	1.49507e-05	0.000837081	3.48943
LINC00324	-1.71735	4.82255	-11.6239	1.5042e-05	0.000839229	3.48263
CACNA1C-AS2	-4.26085	2.45121	-11.605	1.51943e-05	0.000844751	3.4714
AC007342.8	-2.79634	3.02265	-11.5878	1.53331e-05	0.000849051	3.46126
PP7080	-4.39673	3.3335	-11.5822	1.53788e-05	0.000849051	3.45794
BACH1-IT1	3.08841	5.43497	11.5485	1.5658e-05	0.000861462	3.43787
ELOA-AS1	-2.51438	3.5503	-11.5299	1.5814e-05	0.000867035	3.42681
AC011472.1	-4.517	2.2585	-11.4998	1.60702e-05	0.000875425	3.40888
AC068058.1	2.46521	1.2326	11.499	1.60775e-05	0.000875425	3.40837
AC104389.7	-2.72856	1.36428	-11.4866	1.61846e-05	0.000878235	3.40097
AP000317.2	-1.89053	5.27281	-11.4287	1.66955e-05	0.00090287	3.36628
AL360270.2	2.17204	1.54625	11.3631	1.72977e-05	0.000929545	3.32674
AC022726.2	-1.23216	0.616082	-11.3622	1.73061e-05	0.000929545	3.32619
AC008555.1	-2.83307	1.65496	-11.3475	1.74443e-05	0.0009338	3.31732
AC215522.2	3.80836	7.85686	11.3224	1.76834e-05	0.00094193	3.30212
AC005514.1	3.11391	1.55695	11.3146	1.7759e-05	0.00094193	3.29735
AL117335.1	2.28427	5.72745	11.313	1.77745e-05	0.00094193	3.29638
AL589765.1	1.94379	0.971894	11.2938	1.79612e-05	0.0009465	3.28471
AC133644.1	-3.36601	3.45085	-11.2918	1.79802e-05	0.0009465	3.28353
AC022706.1	-4.54771	2.55767	-11.2836	1.80607e-05	0.00094759	3.27854
AL591684.2	-3.6863	3.60611	-11.2203	1.8696e-05	0.000977683	3.23994
AC093484.3	-5.47041	5.0246	-11.199	1.89156e-05	0.000985912	3.22689
CYP1B1-AS1	3.41066	2.28261	11.1892	1.90175e-05	0.000987976	3.22089
HOXB-AS1	-3.88536	2.94086	-11.1504	1.94279e-05	0.001006	3.19704
AC007611.1	2.42317	1.49146	11.1402	1.95371e-05	0.00100804	3.19078
AL662795.2	-2.37007	2.97864	-11.1349	1.95945e-05	0.00100804	3.1875
AC131212.3	2.29984	3.76483	11.1199	1.9758e-05	0.00101316	3.17822
LINC00545	1.67086	0.83543	11.1044	1.99276e-05	0.00101856	3.16867
AL590764.1	-2.20105	3.4335	-11.0841	2.01522e-05	0.00102451	3.15614
AP001189.1	-5.35284	5.09907	-11.0822	2.01734e-05	0.00102451	3.15497
AP000787.1	-3.75893	2.20768	-11.0505	2.0532e-05	0.00103939	3.13528
LINC01730	-3.94406	2.21708	-11.0294	2.07733e-05	0.00104826	3.12222
AC073896.4	-1.51349	5.49659	-11.0157	2.09331e-05	0.00105077	3.11365
AC009113.1	-1.39872	3.53773	-11.0088	2.10132e-05	0.00105077	3.10939
AC115618.3	-2.6602	3.64194	-11.0046	2.10627e-05	0.00105077	3.10675
TSPOAP1-AS1	-2.41954	5.30549	-11.0024	2.10884e-05	0.00105077	3.10539
HSD11B1-AS1	3.72186	1.86093	10.9922	2.12087e-05	0.00105346	3.09903
C2CD4D-AS1	-5.49331	3.25738	-10.9653	2.15301e-05	0.00106275	3.08222
AC005224.2	3.98487	2.48814	10.92	2.2083e-05	0.00108423	3.05387
PIK3CD-AS1	1.56148	3.48031	10.9185	2.21021e-05	0.00108423	3.05291
AC087893.2	5.11195	3.90165	10.9076	2.22374e-05	0.0010864	3.04608
AC016949.1	3.09194	3.16794	10.9039	2.22834e-05	0.0010864	3.04377
AC004585.1	-3.29914	1.93051	-10.8736	2.26673e-05	0.00110173	3.02467
AL158212.4	2.59607	2.71252	10.8648	2.27799e-05	0.00110302	3.01913
AC011471.3	4.47637	2.6347	10.8607	2.28331e-05	0.00110302	3.01652
AC107027.3	-1.90706	1.59949	-10.845	2.30365e-05	0.00110946	3.0066
AL359198.1	-2.03854	1.14617	-10.8388	2.31165e-05	0.00110994	3.00273
AC007278.1	5.71321	6.69112	10.8261	2.32839e-05	0.0011146	2.99466
AC006042.3	-1.65071	0.825354	-10.8118	2.34727e-05	0.00112025	2.98562
LINC02615	-3.59222	1.83862	-10.786	2.38189e-05	0.00113262	2.96925
AC108010.1	1.4567	7.59155	10.7819	2.38746e-05	0.00113262	2.96663
AC130462.2	-2.85979	7.28981	-10.7756	2.39591e-05	0.00113323	2.96268
EAF1-AS1	-1.9519	1.25151	-10.7338	2.45366e-05	0.00115709	2.93603
AL160272.1	2.15029	1.55938	10.7233	2.46837e-05	0.00115861	2.92935
AL590385.2	2.06296	10.6277	10.7211	2.4715e-05	0.00115861	2.92793
AF064858.2	6.44321	3.2216	10.7159	2.47884e-05	0.00115862	2.92461
AL021368.2	-2.513	2.12031	-10.6996	2.50197e-05	0.00116414	2.91422
AC016542.3	2.99789	3.46654	10.6973	2.50534e-05	0.00116414	2.91271
AP005263.1	-1.07946	7.29416	-10.6396	2.58963e-05	0.00119732	2.87568
AP002840.2	-2.62551	3.1645	-10.6381	2.59186e-05	0.00119732	2.87472
RAD51-AS1	-2.21381	5.1313	-10.6196	2.61956e-05	0.00120598	2.86282
LINC02863	-1.34624	5.82406	-10.6154	2.62584e-05	0.00120598	2.86014
BOLA3-AS1	-3.02344	1.979	-10.5965	2.65461e-05	0.00121388	2.84795
AL354979.1	1.55961	0.779807	10.5941	2.65835e-05	0.00121388	2.84637
AL356752.1	4.06793	2.70329	10.5773	2.68421e-05	0.00121953	2.83553
AL450384.2	-2.10988	2.46011	-10.5761	2.68612e-05	0.00121953	2.83474
AC100830.1	1.8219	1.05705	10.5675	2.69953e-05	0.00122128	2.82916
AC093520.1	2.85317	1.49544	10.5637	2.70538e-05	0.00122128	2.82674
LINC02362	2.45278	4.09041	10.5476	2.73086e-05	0.00122564	2.81625
AC104564.5	2.81755	7.16707	10.5435	2.73721e-05	0.00122564	2.81365
AC008393.1	-1.70548	1.03407	-10.5429	2.73824e-05	0.00122564	2.81322
AL589765.4	-4.29706	2.54195	-10.5281	2.76178e-05	0.00123218	2.80364
SNHG1	-2.96098	4.92449	-10.5209	2.77337e-05	0.00123218	2.79895
MCM3AP-AS1	-1.49952	0.783001	-10.5192	2.77619e-05	0.00123218	2.79782
AC093525.6	1.56295	2.01593	10.4843	2.83301e-05	0.00124723	2.77513
TMEM167B-DT	1.41494	2.51064	10.4821	2.83669e-05	0.00124723	2.77368
SNHG25	-2.26173	4.96721	-10.4804	2.83947e-05	0.00124723	2.77258
AC127070.4	2.65966	4.59748	10.4783	2.84297e-05	0.00124723	2.7712
AC016571.1	2.59119	1.29559	10.4744	2.84946e-05	0.00124723	2.76865
CEBPA-DT	-1.19913	0.786354	-10.4473	2.89493e-05	0.00125785	2.75092
ANKRD44-IT1	1.99937	5.8797	10.4461	2.8969e-05	0.00125785	2.75016
AP001062.3	-2.36296	3.5852	-10.4452	2.8985e-05	0.00125785	2.74954
AC027097.1	-2.30403	3.73525	-10.4373	2.91184e-05	0.00125785	2.7444
BX088651.4	-1.48729	0.743643	-10.4364	2.91341e-05	0.00125785	2.74379
LINC00847	-1.7857	5.09767	-10.4088	2.9609e-05	0.00127488	2.72569
AC137932.2	-3.59585	2.07028	-10.3954	2.9842e-05	0.00128143	2.71691
ZBTB11-AS1	-1.30079	3.72038	-10.3696	3.02977e-05	0.00129748	2.69993
AC009133.1	1.4355	2.5255	10.3368	3.08885e-05	0.00131921	2.6783
SNHG29	-3.63079	6.71825	-10.3224	3.11526e-05	0.00132692	2.66876
AC092117.2	1.61949	3.62818	10.3116	3.13519e-05	0.00133182	2.66162
AC027801.5	1.51252	4.28766	10.3062	3.14523e-05	0.00133252	2.65804
AC103563.7	-3.9804	2.31613	-10.2876	3.1801e-05	0.0013437	2.64569
AL137186.2	1.85986	1.34164	10.2819	3.1908e-05	0.00134463	2.64192
LINC00653	-2.42803	3.62238	-10.2639	3.22511e-05	0.00135549	2.62994
AC010536.1	-1.2005	2.03718	-10.2506	3.2506e-05	0.00136259	2.62112
AL049796.1	-1.68423	0.842114	-10.2258	3.29896e-05	0.00137762	2.60457
AL627309.2	3.46416	4.49567	10.2233	3.30385e-05	0.00137762	2.60291
AC073115.1	-2.60643	1.30321	-10.2093	3.33167e-05	0.00138557	2.59351
LINC01503	2.33608	4.09923	10.1849	3.38048e-05	0.00140139	2.57721
AC147067.1	-2.09735	4.22022	-10.1815	3.3874e-05	0.00140139	2.57492
VASH1-AS1	-2.64586	3.81961	-10.1521	3.44763e-05	0.00142259	2.55517
AC002116.1	-1.5999	5.60059	-10.1343	3.4845e-05	0.00143226	2.54324
AC004706.1	-3.60624	2.24851	-10.1321	3.48912e-05	0.00143226	2.54176
AL355987.2	-1.9169	5.55293	-10.1272	3.49958e-05	0.00143284	2.53841
AC048341.1	1.23501	2.84197	10.1177	3.51948e-05	0.00143716	2.53205
AC245014.3	-2.0438	6.92187	-10.1125	3.5305e-05	0.00143716	2.52854
AC073517.1	2.35844	1.17922	10.1093	3.53735e-05	0.00143716	2.52637
BX293535.1	-3.0766	1.5383	-10.0996	3.55814e-05	0.00144191	2.5198
LINC02363	3.75576	3.20415	10.0953	3.56729e-05	0.00144193	2.51692
LINC02132	-2.21396	1.10698	-10.0802	3.59999e-05	0.00144806	2.50669
AC022517.1	4.00617	2.26183	10.0798	3.60074e-05	0.00144806	2.50646
AL133444.1	-4.3793	2.33698	-10.0612	3.64159e-05	0.00146079	2.49381
AL137058.2	-2.97101	3.43129	-10.0456	3.6759e-05	0.00146726	2.4833
AC018638.7	3.39963	3.10063	10.0447	3.67793e-05	0.00146726	2.48268
MHENCR	-2.21257	6.16296	-10.0413	3.68552e-05	0.00146726	2.48037
AC093525.8	3.0243	6.15999	10.0347	3.70028e-05	0.00146945	2.47589
AC022400.6	-2.1109	5.16808	-10.0076	3.7616e-05	0.00149006	2.45746
AC079922.2	-2.68524	3.08597	-9.9943	3.79221e-05	0.00149844	2.44837
SNHG19	-3.07633	4.45573	-9.98712	3.80881e-05	0.00150126	2.44347
HECW2-AS1	-2.2164	2.16715	-9.97096	3.84647e-05	0.00151234	2.43244
AC091230.1	2.2569	1.31599	9.94366	3.91106e-05	0.00153393	2.41377
AC092645.1	-1.78001	1.35238	-9.92392	3.95856e-05	0.00154496	2.40023
LINC00235	-3.55978	2.18564	-9.92387	3.95869e-05	0.00154496	2.40019
AC092295.2	-2.42381	2.19004	-9.91401	3.98265e-05	0.00154908	2.39342
AC005899.4	-1.02306	8.39692	-9.91149	3.98879e-05	0.00154908	2.3917
AC099811.5	2.54281	6.30639	9.90563	4.00316e-05	0.00155086	2.38766
SCAMP1-AS1	-3.45266	3.78231	-9.90085	4.01488e-05	0.00155161	2.38438
AC022762.2	2.75328	2.59917	9.88892	4.04439e-05	0.00155832	2.37617
AC015799.1	2.8569	4.72	9.88589	4.05193e-05	0.00155832	2.37408
MIR3142HG	-3.63867	2.13481	-9.87764	4.07251e-05	0.00156244	2.3684
AC025031.5	2.12146	2.31936	9.84648	4.15134e-05	0.00158884	2.34689
AC006330.1	1.8026	3.13711	9.83263	4.18695e-05	0.00159861	2.33731
AC006942.1	-1.69184	4.47524	-9.82327	4.2112e-05	0.001604	2.33083
Z99774.1	1.55419	0.81843	9.81599	4.23017e-05	0.00160736	2.32579
LINC01934	-1.92139	1.26989	-9.807	4.25376e-05	0.00161246	2.31955
AC090559.2	3.95966	2.35935	9.79013	4.29841e-05	0.0016255	2.30784
AL691403.1	1.74268	0.871338	9.77512	4.33859e-05	0.00163409	2.2974
AC009061.1	2.14432	1.07216	9.77086	4.35006e-05	0.00163409	2.29443
CA3-AS1	-3.74583	1.87291	-9.77011	4.35207e-05	0.00163409	2.29392
AC010210.1	2.09194	2.11824	9.75711	4.38734e-05	0.00164344	2.28486
AL135999.1	-2.79207	4.90125	-9.72847	4.46621e-05	0.00166904	2.26487
AL592158.1	5.24126	3.20658	9.72195	4.48438e-05	0.00167188	2.26031
MANEA-DT	-2.02023	2.26534	-9.71664	4.49925e-05	0.00167349	2.2566
AL353622.1	-2.42457	3.00199	-9.70794	4.52374e-05	0.00167866	2.25051
Z97653.2	2.03862	1.01931	9.69985	4.54663e-05	0.00168321	2.24484
AC016597.2	2.72801	1.62594	9.69475	4.56114e-05	0.00168465	2.24127
AC093297.2	-1.78722	1.69826	-9.67064	4.63044e-05	0.00170626	2.22435
AC093799.1	2.6209	1.52425	9.65593	4.67332e-05	0.00171807	2.214
KLF7-IT1	2.40439	5.6235	9.64678	4.70023e-05	0.00172396	2.20756
AC008537.3	2.53081	2.59342	9.64064	4.71837e-05	0.00172411	2.20323
LINC02446	-6.3049	4.54026	-9.62711	4.75864e-05	0.00172411	2.19369
AP003071.1	3.00545	1.80903	9.61681	4.78958e-05	0.00172411	2.18642
AL589765.5	-2.06326	1.03163	-9.6143	4.79715e-05	0.00172411	2.18465
AL136141.1	2.62445	1.31223	9.61303	4.80098e-05	0.00172411	2.18375
LINC00526	-2.69212	1.62867	-9.61122	4.80648e-05	0.00172411	2.18247
LINC01002	4.56955	4.29054	9.60979	4.8108e-05	0.00172411	2.18146
AC134407.2	1.37593	2.55761	9.6096	4.81135e-05	0.00172411	2.18133
AC144831.1	3.75548	3.40276	9.60424	4.82762e-05	0.00172411	2.17754
AL365361.1	-2.90738	3.90834	-9.60345	4.83005e-05	0.00172411	2.17698
AC012507.1	-3.41587	2.06497	-9.59882	4.84415e-05	0.00172411	2.1737
AC005072.1	3.43006	3.21525	9.59816	4.84617e-05	0.00172411	2.17324
AC020703.1	3.81984	4.29007	9.59667	4.85073e-05	0.00172411	2.17218
AC092139.2	3.23271	4.77054	9.59419	4.85831e-05	0.00172411	2.17043
HAR1A	-3.73473	2.05126	-9.59238	4.86385e-05	0.00172411	2.16915
AC002558.3	2.23781	3.77185	9.58137	4.89778e-05	0.00173226	2.16134
AP001412.1	-1.10165	2.29303	-9.56838	4.93813e-05	0.00174264	2.15214
AC009093.2	1.56089	3.06225	9.5625	4.95651e-05	0.00174446	2.14796
LINC01311	-3.79054	2.42126	-9.55971	4.96529e-05	0.00174446	2.14598
TMPO-AS1	-1.77815	2.10624	-9.54564	5.00969e-05	0.00175616	2.13598
AC005070.3	1.78067	4.36111	9.53681	5.03781e-05	0.00176212	2.1297
RUFY1-AS1	1.80145	1.16801	9.52642	5.0711e-05	0.0017676	2.12231
AP001107.9	-1.85677	1.12131	-9.52379	5.07958e-05	0.0017676	2.12043
STPG3-AS1	-1.01767	1.7414	-9.52151	5.08693e-05	0.0017676	2.11881
SNHG6	-2.45291	4.99208	-9.51098	5.12106e-05	0.00177556	2.1113
WDR86-AS1	-4.09656	2.3407	-9.4977	5.16449e-05	0.00178671	2.10182
AC245128.3	3.07147	7.91232	9.49322	5.17924e-05	0.00178791	2.09862
AC009052.1	-2.17777	4.73507	-9.48319	5.21241e-05	0.00179545	2.09145
AL135818.1	-2.39699	3.29825	-9.47532	5.23865e-05	0.00180057	2.08581
AC005332.2	-2.27282	1.84924	-9.47059	5.25447e-05	0.0018021	2.08243
LINC01036	-3.19198	1.7889	-9.46538	5.27197e-05	0.0018042	2.07869
AL034550.2	-3.49033	1.99684	-9.45896	5.29362e-05	0.0018077	2.07409
AC018607.1	3.22443	6.79543	9.45153	5.31879e-05	0.00181239	2.06876
TGFA-IT1	2.81079	1.60965	9.44381	5.34509e-05	0.00181712	2.06323
AL353764.1	2.75142	1.37571	9.43786	5.3655e-05	0.00181712	2.05895
AC010615.2	-4.49967	2.77005	-9.4374	5.36708e-05	0.00181712	2.05862
LINC01184	-2.00848	2.1105	-9.43275	5.38305e-05	0.00181864	2.05528
AC130454.1	4.03093	5.63444	9.42896	5.39612e-05	0.00181918	2.05256
NARF-IT1	2.59036	5.16019	9.36982	5.60497e-05	0.00188558	2.00991
MELTF-AS1	-2.6555	1.41604	-9.35647	5.65342e-05	0.00189785	2.00025
AC027290.2	2.439	5.09095	9.34951	5.67884e-05	0.00190235	1.99521
AC090517.5	-1.93987	1.50702	-9.32628	5.76468e-05	0.00192703	1.97836
AC079781.5	-2.39399	4.18184	-9.30665	5.83836e-05	0.00193956	1.96409
AC004540.1	1.51315	0.756574	9.30548	5.84279e-05	0.00193956	1.96324
LINC00623	-2.25043	5.87697	-9.30416	5.8478e-05	0.00193956	1.96228
AC018628.1	2.04848	4.63217	9.29723	5.87414e-05	0.00193956	1.95723
AC026464.2	-2.59472	2.47429	-9.29702	5.87494e-05	0.00193956	1.95708
WDFY3-AS2	2.15222	1.38166	9.29684	5.87561e-05	0.00193956	1.95695
AC006077.2	-2.30261	3.81418	-9.28613	5.91658e-05	0.00194737	1.94914
DBH-AS1	-2.83149	1.64745	-9.27859	5.9456e-05	0.00194737	1.94365
AL359644.1	-2.62443	3.51434	-9.27836	5.94649e-05	0.00194737	1.94348
AC007686.3	2.204	4.60315	9.27786	5.94842e-05	0.00194737	1.94312
AC004877.1	-1.01173	0.57012	-9.26266	6.00749e-05	0.00196265	1.93202
AC073263.3	2.02013	1.01007	9.2472	6.06824e-05	0.00197636	1.92072
AC007485.2	-2.63148	2.20062	-9.24565	6.07438e-05	0.00197636	1.91958
LINC01572	-1.65515	1.0956	-9.23026	6.13563e-05	0.00199219	1.90831
UCKL1-AS1	2.91635	2.61637	9.20267	6.2472e-05	0.00202427	1.88806
AC018638.6	2.95127	2.59999	9.19868	6.26355e-05	0.00202543	1.88513
ARHGAP5-AS1	-1.5174	0.901829	-9.1911	6.2947e-05	0.00203135	1.87955
AC129492.1	-3.12441	1.75277	-9.18442	6.3223e-05	0.00203611	1.87464
AL357153.3	-2.02337	5.09794	-9.1613	6.41895e-05	0.00205788	1.85759
AC092115.2	3.07749	1.80028	9.15804	6.43269e-05	0.00205788	1.85519
SLC2A1-AS1	-2.94422	2.14077	-9.15579	6.44222e-05	0.00205788	1.85353
AC022001.3	3.78945	2.20793	9.15575	6.44237e-05	0.00205788	1.8535
AL357054.4	-1.91089	1.10112	-9.15282	6.45481e-05	0.00205788	1.85133
UBAC2-AS1	-2.3405	1.81454	-9.14842	6.47348e-05	0.00205825	1.84809
AP003086.2	3.314	1.657	9.14643	6.48196e-05	0.00205825	1.84662
FAR1-IT1	2.63941	5.66831	9.13636	6.52505e-05	0.00206779	1.83917
AC010333.1	3.48065	1.74033	9.11007	6.63914e-05	0.00209974	1.8197
AC079174.2	2.41064	3.17087	9.09006	6.72744e-05	0.00212343	1.80485
RUNDC3A-AS1	-1.7334	0.8667	-9.08219	6.76258e-05	0.00213028	1.799
AC015911.3	-3.34331	3.95264	-9.07823	6.78032e-05	0.00213163	1.79605
AP001972.5	-2.54001	6.2184	-9.06533	6.83849e-05	0.00214566	1.78645
AC141586.5	2.65827	3.24032	9.05544	6.8835e-05	0.00215552	1.77908
LINC02182	1.26014	0.63007	9.03417	6.98145e-05	0.00218188	1.7632
AP002748.4	-2.08893	2.23846	-9.02977	7.0019e-05	0.00218294	1.75991
AC090559.1	1.89082	8.81563	9.02751	7.01241e-05	0.00218294	1.75823
SATB1-AS1	-2.38809	1.52253	-8.98767	7.20113e-05	0.00223099	1.72838
AC091965.1	-1.87195	0.935977	-8.98722	7.2033e-05	0.00223099	1.72805
AL845472.1	-2.045	1.73205	-8.98603	7.209e-05	0.00223099	1.72716
RSF1-IT1	2.43755	1.6842	8.9825	7.22602e-05	0.0022319	1.72451
WEE2-AS1	-1.20838	0.633781	-8.97954	7.24033e-05	0.00223196	1.72228
AC090948.3	-3.09173	3.89774	-8.96052	7.33305e-05	0.00225616	1.70798
AP001434.1	3.50145	1.89327	8.94718	7.39887e-05	0.002272	1.69794
AC087286.4	3.05634	4.36781	8.93538	7.4577e-05	0.00228563	1.68903
AC034236.2	-2.43386	2.1395	-8.91342	7.56855e-05	0.00231513	1.67245
AC116348.4	-5.1237	4.83911	-8.9024	7.62489e-05	0.00232787	1.66411
AC051649.1	5.78256	4.4428	8.89667	7.65435e-05	0.00233237	1.65978
AL627309.5	5.61444	3.92046	8.87859	7.74828e-05	0.00235646	1.64607
AF001548.1	4.02137	2.53118	8.8755	7.76446e-05	0.00235686	1.64372
AC068831.3	2.31853	1.2555	8.86189	7.83617e-05	0.00237119	1.63339
AC007546.1	1.11307	5.04168	8.8605	7.84353e-05	0.00237119	1.63233
AC024267.1	-3.57636	3.40839	-8.85804	7.85658e-05	0.00237119	1.63047
AC092135.1	2.28574	3.61738	8.8489	7.9053e-05	0.00238136	1.62352
AC055811.4	-1.95448	3.24411	-8.80549	8.14157e-05	0.00244597	1.59041
MRPL20-DT	-1.71252	2.62543	-8.80385	8.15066e-05	0.00244597	1.58915
LINC00996	-2.50067	1.25033	-8.79363	8.20752e-05	0.00245838	1.58134
LINC01871	-5.03076	3.88131	-8.78537	8.25382e-05	0.00246299	1.57501
AL359715.3	-1.52037	0.867208	-8.78533	8.25401e-05	0.00246299	1.57499
AC023510.1	1.3996	0.699801	8.77138	8.33291e-05	0.00248186	1.56429
SLC25A5-AS1	-1.31849	1.84096	-8.76636	8.36146e-05	0.00248569	1.56045
MAFA-AS1	4.0262	2.0131	8.74796	8.46723e-05	0.00250879	1.54631
HCG18	-1.92024	3.48483	-8.74734	8.47082e-05	0.00250879	1.54584
AL109741.1	-3.88451	2.33673	-8.7433	8.49427e-05	0.00251104	1.54273
AC092999.1	1.99177	1.95112	8.73847	8.52236e-05	0.00251465	1.53901
AL121839.2	-2.42485	1.68657	-8.71857	8.63933e-05	0.00254443	1.52369
OR2A1-AS1	-2.57273	2.25169	-8.71027	8.68862e-05	0.0025542	1.51729
LINC00957	-2.18036	4.38243	-8.70267	8.73408e-05	0.00256281	1.51142
SNHG5	-3.12704	5.19214	-8.69845	8.75947e-05	0.00256551	1.50816
AL354793.1	3.12573	2.00378	8.69264	8.79452e-05	0.00257102	1.50367
AC067852.3	2.3657	3.93955	8.68958	8.813e-05	0.00257168	1.50131
AC011476.2	-3.51526	2.96733	-8.68078	8.86651e-05	0.00258253	1.4945
PARP11-AS1	-3.8662	2.16487	-8.67231	8.91836e-05	0.00258865	1.48795
AC012313.7	-2.2485	2.19021	-8.67202	8.92017e-05	0.00258865	1.48772
LINC02481	-3.60873	3.51843	-8.66522	8.96208e-05	0.00259605	1.48245
FLJ37453	-1.08265	4.44406	-8.659	9.00055e-05	0.00260244	1.47763
AC025031.4	1.4232	2.45246	8.65308	9.03742e-05	0.00260834	1.47303
LINC00173	1.75924	4.70858	8.64384	9.09528e-05	0.00262027	1.46586
LINC02019	2.35873	3.19021	8.63401	9.15725e-05	0.00262737	1.45822
AL845552.2	1.33679	0.668394	8.6323	9.1681e-05	0.00262737	1.45689
Z98883.1	-2.26172	5.01937	-8.63205	9.16968e-05	0.00262737	1.45669
RMDN2-AS1	1.93575	0.967876	8.62809	9.19483e-05	0.00262982	1.45361
Z94721.3	1.86568	4.46424	8.61665	9.26795e-05	0.00264596	1.44471
LINC01876	-1.07488	0.537439	-8.61022	9.30933e-05	0.00265004	1.4397
LPP-AS2	2.3998	3.48186	8.60923	9.31571e-05	0.00265004	1.43893
MIR181A2HG	-2.33694	1.16847	-8.60394	9.3499e-05	0.0026505	1.43481
AC067930.4	1.95278	1.33096	8.60381	9.35076e-05	0.0026505	1.4347
IQCH-AS1	-1.41704	0.976739	-8.59637	9.39915e-05	0.00265946	1.4289
AC114980.1	2.37895	2.84552	8.59354	9.41765e-05	0.00265994	1.42669
TMCC1-AS1	-1.22252	0.699546	-8.59027	9.43907e-05	0.00266125	1.42413
AC138035.1	3.46544	4.13358	8.57225	9.55804e-05	0.00268638	1.41005
AC091173.1	3.06712	1.86076	8.56406	9.61266e-05	0.0026958	1.40364
AL731559.1	3.54366	5.1904	8.55147	9.69735e-05	0.0027145	1.39377
AC130448.2	5.07759	5.08251	8.54907	9.7136e-05	0.0027145	1.39189
AL356417.1	-1.39074	0.695368	-8.53684	9.79681e-05	0.00273293	1.3823
ASAP1-IT2	4.38716	4.13182	8.52601	9.87121e-05	0.00274513	1.37379
AL354920.1	-5.5782	3.18485	-8.52427	9.88323e-05	0.00274513	1.37242
AP000919.3	4.04036	4.65291	8.52293	9.89252e-05	0.00274513	1.37136
SUCLG2-AS1	-1.28856	0.675476	-8.51205	9.96812e-05	0.00275743	1.3628
RRN3P2	-1.51919	4.81839	-8.51154	9.97163e-05	0.00275743	1.3624
CDC42-IT1	3.69701	4.43806	8.50202	0.000100384	0.00277104	1.3549
AC007785.3	1.47419	0.737097	8.49808	0.000100661	0.00277388	1.35179
AC092135.3	3.25231	3.92734	8.49174	0.00010111	0.00277905	1.3468
AC010733.1	2.28153	6.26271	8.49047	0.0001012	0.00277905	1.34579
DENND6A-DT	1.78202	0.98145	8.47547	0.000102271	0.00280361	1.33395
AC010173.1	-1.13259	5.29231	-8.4728	0.000102463	0.00280379	1.33185
AC023090.2	1.7831	1.66837	8.46965	0.00010269	0.00280379	1.32935
AC026367.2	2.19628	2.47962	8.46609	0.000102948	0.00280379	1.32653
AC093627.1	2.35511	1.17756	8.4644	0.00010307	0.00280379	1.3252
TDRKH-AS1	-2.75687	1.37843	-8.46312	0.000103163	0.00280379	1.32419
AC009032.1	2.68092	3.71923	8.45599	0.000103682	0.00281308	1.31854
AC037459.2	1.59323	5.07477	8.45103	0.000104044	0.0028166	1.31462
EDRF1-DT	-1.52216	0.761078	-8.44935	0.000104167	0.0028166	1.31329
CCDC18-AS1	-1.08794	5.34417	-8.42625	0.000105878	0.00285564	1.29496
KDM7A-DT	-3.73299	5.43439	-8.42501	0.000105971	0.00285564	1.29397
AC103769.1	2.72262	4.30989	8.4211	0.000106264	0.00285837	1.29087
AL078604.2	2.84867	3.34054	8.41884	0.000106434	0.00285837	1.28908
LINC00987	-1.93159	2.23426	-8.40073	0.000107805	0.00288258	1.27467
LINC02751	1.93129	0.965645	8.40066	0.000107811	0.00288258	1.27461
GK-IT1	3.23963	5.65765	8.39975	0.000107881	0.00288258	1.27389
SLC25A25-AS1	-1.48451	3.35651	-8.39135	0.000108524	0.00288889	1.2672
AC126755.5	-3.15822	2.97247	-8.39022	0.000108612	0.00288889	1.26629
AC099811.1	2.68374	5.62805	8.38851	0.000108743	0.00288889	1.26493
RNF157-AS1	-2.48208	1.34027	-8.38717	0.000108846	0.00288889	1.26386
THAP7-AS1	-2.336	1.64869	-8.37943	0.000109445	0.00289993	1.25769
PITPNA-AS1	-3.1547	3.23301	-8.37257	0.00010998	0.00290513	1.25221
SNHG15	-2.82751	4.06995	-8.36934	0.000110232	0.00290513	1.24963
AP001267.4	2.36341	1.51732	8.36915	0.000110247	0.00290513	1.24948
STX18-AS1	-1.59668	1.21942	-8.36752	0.000110375	0.00290513	1.24818
HSD52	1.66947	1.08019	8.36253	0.000110766	0.0029106	1.24419
AP005432.1	2.05943	1.98903	8.35559	0.000111315	0.00292017	1.23864
ZNF710-AS1	-2.56148	3.02329	-8.34956	0.000111793	0.00292387	1.23382
KCTD21-AS1	-1.93697	1.01572	-8.34916	0.000111825	0.00292387	1.23349
AL928654.4	-1.3248	1.55113	-8.34228	0.000112374	0.00293338	1.22799
AC012150.1	3.20354	1.92022	8.33604	0.000112874	0.0029416	1.22299
AL139352.1	-3.17934	1.68638	-8.32219	0.000113994	0.00296591	1.21188
GIHCG	-1.49634	3.4632	-8.29958	0.000115851	0.00300927	1.1937
AC009303.4	2.13807	3.39789	8.28933	0.000116704	0.00302647	1.18545
AP000640.1	1.59326	3.21233	8.28239	0.000117285	0.00303657	1.17986
AC103703.1	2.07908	2.78866	8.26309	0.00011892	0.00307388	1.16429
AC084117.1	3.79595	2.21657	8.26069	0.000119125	0.00307417	1.16235
AC009229.2	4.84851	2.42425	8.24668	0.00012033	0.00310021	1.15103
HMGA2-AS1	1.49678	0.790177	8.23571	0.000121283	0.00311632	1.14215
AP003472.1	-2.48514	1.24257	-8.23065	0.000121726	0.00311632	1.13805
NDUFA6-DT	-2.08613	2.21007	-8.22872	0.000121896	0.00311632	1.13648
AC008906.1	1.65451	3.92369	8.22838	0.000121926	0.00311632	1.1362
AC127521.1	-4.01221	2.60951	-8.22603	0.000122133	0.00311632	1.1343
AC025048.2	-1.91522	1.39087	-8.226	0.000122135	0.00311632	1.13427
AL596325.1	-1.51023	1.05621	-8.21525	0.000123085	0.0031355	1.12556
AL512770.1	2.92305	1.52692	8.20977	0.000123573	0.00314256	1.1211
AC011676.2	3.39482	1.69741	8.20539	0.000123964	0.00314274	1.11755
LIMD1-AS1	-1.44054	2.50671	-8.19274	0.000125103	0.00316655	1.10726
AC016405.1	2.71738	3.18877	8.18581	0.000125731	0.00317737	1.10163
LINC00426	-3.10329	2.97983	-8.16806	0.000127358	0.00321337	1.08716
AP000320.1	2.2065	1.10325	8.1653	0.000127613	0.00321468	1.08491
AC007663.4	-2.80075	2.36855	-8.15063	0.00012898	0.00324394	1.07293
SUGT1-DT	-2.26382	1.3289	-8.1406	0.000129923	0.00326249	1.06473
AC073073.2	-1.26253	0.949676	-8.11025	0.000132827	0.00332005	1.03986
AC016065.1	-1.45726	2.28403	-8.11007	0.000132844	0.00332005	1.03971
LINC00865	-1.45903	0.784134	-8.0868	0.00013512	0.00337162	1.0206
AF064858.1	5.54138	3.07646	8.08447	0.00013535	0.00337205	1.01868
AC025257.1	-2.3073	1.15365	-8.08043	0.000135751	0.00337673	1.01535
AC008870.1	-1.12882	3.51251	-8.07127	0.000136664	0.00339411	1.00781
Z97192.2	3.25838	2.12608	8.04798	0.000139018	0.00344716	0.988597
PWAR5	-2.71999	3.52518	-7.99444	0.000144607	0.00357457	0.944242
AC004923.4	2.71507	1.48852	7.99151	0.00014492	0.00357549	0.941811
AC002551.1	3.01245	2.11871	7.98987	0.000145096	0.00357549	0.940448
AC108047.1	-2.52994	1.26497	-7.97364	0.000146847	0.00361302	0.926948
AC097641.1	-1.60095	3.0375	-7.953	0.000149109	0.00366299	0.909746
RBM26-AS1	-1.26365	0.901893	-7.9474	0.000149729	0.00367254	0.905073
AC018845.3	-1.63578	2.3813	-7.93096	0.000151569	0.00371192	0.891332
LINC02035	2.79762	5.08243	7.92792	0.000151912	0.00371407	0.888787
AC019205.1	-1.82298	1.13765	-7.92603	0.000152126	0.00371407	0.887208
AL355336.1	1.31528	3.52072	7.91205	0.000153716	0.00374712	0.875505
RNASEH1-AS1	-2.75228	3.12795	-7.9023	0.000154837	0.00376865	0.867328
FAM85B	1.7524	0.956084	7.89934	0.000155179	0.00377119	0.864843
AC099329.1	-1.90404	5.70899	-7.89604	0.000155561	0.00377468	0.862077
AL133243.3	1.86731	4.22006	7.89169	0.000156067	0.00377697	0.858423
LINC02288	3.23612	2.54451	7.89069	0.000156183	0.00377697	0.857586
AC125437.2	2.45721	1.80645	7.88908	0.000156371	0.00377697	0.856236
AC009229.1	3.92183	1.96092	7.88386	0.000156982	0.00378597	0.851844
AC003666.1	1.04397	0.521985	7.87233	0.00015834	0.00380883	0.842152
LRRC8C-DT	-2.57685	1.84722	-7.87174	0.000158411	0.00380883	0.841649
AC104964.2	2.82985	2.34754	7.86889	0.000158748	0.00381116	0.839254
AL021707.7	3.42977	2.86924	7.8652	0.000159187	0.00381255	0.836147
AL512408.1	1.35825	2.32212	7.86436	0.000159287	0.00381255	0.835441
AC004918.1	-3.76815	3.19959	-7.85329	0.000160614	0.00383547	0.826109
AC005391.1	4.30693	3.05722	7.85233	0.000160729	0.00383547	0.8253
AC002553.2	2.63075	3.75579	7.84106	0.000162093	0.00385971	0.815788
AC234775.2	1.85707	3.95729	7.83923	0.000162316	0.00385971	0.814242
AC073508.3	-1.27241	3.14092	-7.83792	0.000162476	0.00385971	0.813138
AL136419.1	-2.55661	1.61089	-7.81698	0.000165052	0.00391503	0.795436
AC026471.5	1.3724	0.686199	7.80841	0.00016612	0.00393449	0.788175
AL139220.2	-3.5175	1.90661	-7.79904	0.000167297	0.00395645	0.78023
FAM226B	-2.98502	1.8299	-7.7809	0.000169602	0.00400498	0.764831
AP006259.1	3.22167	4.65785	7.77582	0.000170254	0.0040144	0.760513
KDM5C-IT1	1.56707	3.29677	7.763	0.000171912	0.00404684	0.749607
AC087294.1	2.53129	3.24255	7.75943	0.000172378	0.00404684	0.746563
AC024940.5	-2.38	4.35289	-7.75929	0.000172396	0.00404684	0.746443
AC040160.2	1.75888	3.55998	7.75683	0.000172717	0.00404837	0.744352
AC114781.2	3.137	2.14462	7.75465	0.000173002	0.00404906	0.742496
AP002387.1	-2.66186	4.19198	-7.73787	0.000175217	0.00409486	0.728177
AC073592.7	2.5147	1.74429	7.72585	0.000176823	0.00412629	0.717913
SLC1A2-AS1	1.71049	0.855244	7.72329	0.000177166	0.00412824	0.715726
AC012313.1	-1.93419	2.87333	-7.71854	0.000177808	0.0041371	0.711659
AC010973.2	-2.28187	1.2843	-7.70391	0.000179798	0.00417726	0.699136
AC105118.1	4.07692	2.03846	7.69676	0.00018078	0.00419394	0.693004
AC007950.2	1.74356	1.48589	7.68698	0.000182132	0.00421382	0.684619
AC091059.2	2.13499	2.68985	7.68672	0.000182169	0.00421382	0.684389
ERICH6-AS1	-2.48033	1.70984	-7.6828	0.000182714	0.00422026	0.68103
AC022182.1	1.87385	2.1034	7.6774	0.000183469	0.00423153	0.676389
AC025280.1	4.13793	2.95155	7.67235	0.000184179	0.00424173	0.672043
AC098872.1	1.96928	0.984641	7.66694	0.000184941	0.0042531	0.667397
AC010655.4	-2.68709	4.08484	-7.64929	0.000187455	0.00429845	0.652199
LINC02320	3.0627	1.75099	7.6454	0.000188015	0.00430379	0.648844
AC025034.1	1.84542	1.29187	7.62585	0.000190856	0.00435751	0.631966
AL162427.1	1.20613	0.603063	7.62276	0.000191309	0.00436156	0.6293
LINC02680	2.46131	3.31662	7.61228	0.000192856	0.00439052	0.620235
AC058791.1	2.4488	1.43065	7.60846	0.000193423	0.00439629	0.616929
FARP1-AS1	1.90754	0.95377	7.60685	0.000193664	0.00439629	0.615528
ZNF667-AS1	-2.06829	1.2086	-7.60014	0.000194666	0.00441062	0.609724
AL512625.1	-1.73879	1.58874	-7.5968	0.000195168	0.00441062	0.606823
LINC00884	2.84983	2.64046	7.5964	0.000195227	0.00441062	0.606482
AC123912.4	-5.14915	5.32064	-7.5952	0.000195409	0.00441062	0.605436
AL442125.1	3.01404	3.09224	7.59321	0.000195708	0.00441109	0.603713
AC009292.2	1.28717	0.643583	7.59121	0.000196011	0.00441163	0.601976
AL133243.2	1.53163	3.66468	7.58209	0.000197393	0.00443645	0.594065
AC232271.1	-1.18672	4.20434	-7.57937	0.000197809	0.00443948	0.5917
DNAJC9-AS1	-2.25456	1.24035	-7.55308	0.000201868	0.0045178	0.568838
PKD1P6-NPIPP1	-2.95568	3.69484	-7.54901	0.000202506	0.00452567	0.56529
AL121992.2	2.70452	1.35226	7.54372	0.000203337	0.00453473	0.56068
AC093484.1	-1.21154	4.78739	-7.54261	0.000203511	0.00453473	0.559718
AC010969.2	-2.08819	1.98294	-7.54098	0.000203769	0.00453473	0.558288
AC092375.2	-1.85061	1.77958	-7.52706	0.000205981	0.00457752	0.546141
AC113382.2	1.22252	0.611262	7.52326	0.00020659	0.00458461	0.54282
ADAMTSL4-AS2	2.65094	7.55936	7.51973	0.000207156	0.00459076	0.539738
AC027763.2	2.07829	1.03914	7.5162	0.000207725	0.00459693	0.536652
AC105020.6	-2.42918	2.62977	-7.50464	0.000209601	0.00462224	0.526537
AC012100.2	2.94208	4.37488	7.5034	0.000209803	0.00462224	0.525451
C15orf54	-4.08245	2.04123	-7.50157	0.000210102	0.00462224	0.52385
AC005394.2	-1.63486	0.817429	-7.50055	0.00021027	0.00462224	0.522951
LINC02100	-3.73663	1.86831	-7.50016	0.000210333	0.00462224	0.522613
AC027575.2	-1.83219	2.83859	-7.49691	0.000210866	0.00462224	0.519762
AC009686.2	-2.8897	1.76836	-7.49664	0.00021091	0.00462224	0.519526
LINC00630	-1.89473	1.84598	-7.4899	0.000212021	0.00464015	0.513618
ATP2C2-AS1	2.02196	2.33246	7.4857	0.000212716	0.00464894	0.509936
AC108704.2	3.55535	6.53502	7.48113	0.000213475	0.0046591	0.505928
AC007879.3	2.30978	2.98031	7.47679	0.000214199	0.00466847	0.502117
AC098484.4	-1.29757	0.907324	-7.4547	0.000217929	0.00473263	0.482688
AC087284.1	1.78869	3.55916	7.45346	0.000218139	0.00473263	0.481601
LINC02384	-2.70224	2.907	-7.45231	0.000218337	0.00473263	0.480583
AC010538.1	1.25702	0.885918	7.44118	0.000220247	0.00476751	0.470781
DPP4-DT	-2.06547	1.25162	-7.4394	0.000220554	0.00476764	0.469213
AC084018.2	1.20333	2.41709	7.42761	0.000222603	0.00480537	0.458807
DGCR11	1.81503	4.9067	7.42357	0.000223309	0.00480865	0.455243
AC026748.1	-2.07982	2.19111	-7.42327	0.000223362	0.00480865	0.454978
RPS6KB2-AS1	-3.88512	2.47303	-7.41753	0.000224371	0.00481306	0.449903
SNHG30	-1.4811	4.94231	-7.41591	0.000224658	0.00481306	0.448467
AP001922.3	3.54045	5.89533	7.41468	0.000224875	0.00481306	0.44738
AC026803.2	2.82592	1.41296	7.41349	0.000225085	0.00481306	0.446328
LINC01012	-1.53514	0.767569	-7.40179	0.000227165	0.00485027	0.435977
SUGT1P4-STRA6LP	-2.67271	1.51173	-7.40027	0.000227438	0.00485027	0.434628
AC096677.1	-2.6452	1.47337	-7.39643	0.000228126	0.0048584	0.43123
LINC01281	-1.42811	0.714053	-7.39262	0.000228811	0.00486645	0.427855
AC022211.2	-2.56415	2.46792	-7.37102	0.000232742	0.00494342	0.408687
POC1B-AS1	1.27283	3.47301	7.36921	0.000233076	0.0049439	0.407071
LINC00534	-2.32382	1.27451	-7.3624	0.000234333	0.00496391	0.401019
AF111167.2	2.43406	2.27446	7.36052	0.000234682	0.00496467	0.399345
AC131212.2	3.42487	2.91086	7.34947	0.000236741	0.00500154	0.389517
AC107959.1	-2.14703	4.34317	-7.34621	0.000237352	0.00500778	0.386614
AL390318.1	1.0466	5.46326	7.33986	0.00023855	0.00502636	0.380949
OSER1-DT	-2.26594	4.63618	-7.33592	0.000239296	0.00502931	0.377438
AC005538.2	-2.62757	1.6357	-7.33577	0.000239325	0.00502931	0.3773
AC073127.1	3.74046	1.87023	7.33193	0.000240054	0.00503589	0.373876
LINC00299	-2.41342	2.06018	-7.32727	0.000240943	0.00503589	0.369716
LIX1L-AS1	1.32185	1.15024	7.32705	0.000240985	0.00503589	0.369523
TMEM9B-AS1	-1.92005	4.23937	-7.32629	0.00024113	0.00503589	0.368843
AC117382.2	1.34586	1.83306	7.32578	0.000241227	0.00503589	0.368392
AC022364.1	-2.08646	1.69304	-7.3201	0.000242319	0.00504135	0.363311
LINC02193	3.42632	2.84539	7.31969	0.000242398	0.00504135	0.362943
AC104971.3	-2.88833	1.44417	-7.31945	0.000242443	0.00504135	0.362734
MYCBP2-AS1	1.23144	0.767231	7.31251	0.000243784	0.00506259	0.356527
AC131180.1	-2.72223	1.39389	-7.30546	0.000245153	0.00508437	0.350224
AC131009.3	-2.37941	3.37784	-7.30018	0.000246185	0.00509909	0.345499
AC007598.3	2.01406	1.50902	7.29379	0.000247441	0.00511841	0.339773
AC006460.2	1.11987	1.1133	7.27892	0.000250392	0.0051727	0.326432
AC026367.3	2.15811	3.16227	7.26822	0.00025254	0.00520172	0.316822
AC022400.1	3.51129	1.75565	7.26795	0.000252592	0.00520172	0.316586
RGS5	-1.41782	1.67225	-7.26702	0.000252782	0.00520172	0.315744
AC104083.1	-2.48692	1.52868	-7.26383	0.000253425	0.00520819	0.312884
BACH1-IT2	2.84231	4.27114	7.25942	0.000254321	0.00521983	0.308914
LINC01093	2.90986	1.45493	7.25747	0.000254718	0.00522123	0.307157
AC090948.1	-3.19816	4.54537	-7.24949	0.000256349	0.00524786	0.299977
AL365273.1	2.8984	5.48329	7.24587	0.000257093	0.00525026	0.296714
Z93241.1	1.49891	7.61059	7.24471	0.000257331	0.00525026	0.295674
AC009229.4	4.82044	2.72198	7.24409	0.00025746	0.00525026	0.295109
LINC01144	-1.48245	1.32169	-7.22452	0.00026153	0.00532641	0.27746
LINC00665	-1.58697	0.876982	-7.21498	0.000263541	0.00536048	0.26884
AP002026.1	-1.40478	0.795416	-7.19293	0.000268258	0.00544621	0.248881
DISC1-IT1	3.26048	2.92666	7.19207	0.000268444	0.00544621	0.248102
AC008763.1	-1.05023	4.66446	-7.18758	0.000269416	0.00545894	0.244035
MIR924HG	-1.48863	0.744314	-7.18097	0.000270857	0.00548113	0.238034
DANCR	-3.58957	3.657	-7.17763	0.000271587	0.00548314	0.235003
LINC00640	2.89648	1.85057	7.17735	0.000271648	0.00548314	0.234751
AC125603.4	2.09119	1.26357	7.17112	0.000273018	0.00550377	0.229092
AC090948.2	-3.15201	4.64811	-7.16772	0.000273768	0.00550999	0.226003
AC022532.1	1.86426	3.08048	7.16657	0.000274021	0.00550999	0.224963
MATN1-AS1	-2.35101	2.52395	-7.15921	0.000275657	0.00553584	0.218269
ZNF337-AS1	-1.49069	1.21199	-7.1511	0.00027747	0.00556521	0.210891
AC026124.1	1.95025	0.975123	7.14318	0.000279256	0.00559395	0.203672
AL162741.1	2.26646	2.35981	7.13973	0.000280036	0.00560249	0.200534
PRDX6-AS1	1.62332	4.70482	7.12579	0.000283219	0.00565903	0.187817
AC012150.2	3.46024	2.00225	7.11578	0.000285532	0.00569806	0.178666
LINC01128	-2.61132	2.47097	-7.10309	0.000288492	0.00574988	0.167064
AC104561.3	-4.99767	2.9733	-7.10155	0.000288855	0.00574988	0.16565
AC063965.2	3.09279	5.17853	7.09466	0.00029048	0.00577397	0.159338
AC027544.2	1.94907	2.93576	7.09333	0.000290794	0.00577397	0.158123
AC021188.1	-3.82042	3.2744	-7.08428	0.000292947	0.0058062	0.149822
TMSB15B-AS1	-1.92306	0.961529	-7.08325	0.000293192	0.0058062	0.148882
AL096816.1	-2.8949	4.16203	-7.0819	0.000293516	0.0058062	0.147638
LINC01355	-1.93449	1.76113	-7.07977	0.000294025	0.00580901	0.14569
SNRK-AS1	2.7648	2.46922	7.07565	0.000295017	0.00582135	0.141902
AP003068.2	-2.57054	4.98554	-7.07178	0.000295948	0.00583247	0.138355
MKLN1-AS	-1.9827	1.94785	-7.06745	0.000296998	0.00584587	0.134374
KDM2B-DT	-3.09454	2.83188	-7.06525	0.000297532	0.00584912	0.132352
AC010186.3	-1.24685	6.23033	-7.06334	0.000297996	0.00585099	0.130597
LINC01215	-2.76873	4.50591	-7.05931	0.00029898	0.00586305	0.126888
AC008083.3	-2.8339	1.56217	-7.05466	0.000300118	0.00587809	0.122613
DHRSX-IT1	3.28898	2.91651	7.04936	0.000301424	0.00589637	0.117731
AC093510.1	-2.22596	1.3374	-7.03991	0.000303766	0.00593485	0.109024
AL513548.1	-1.2362	0.689967	-7.03251	0.000305613	0.00596359	0.102204
AL353803.4	2.0736	1.14055	7.02706	0.000306983	0.00598297	0.0971697
LINC01300	2.26075	1.13037	7.01361	0.000310392	0.00603455	0.084748
AC005674.1	-1.08925	5.33299	-7.00215	0.000313332	0.00607994	0.0741419
AC013731.1	-2.11509	1.05754	-7.00152	0.000313494	0.00607994	0.073561
HRAT92	-2.24868	1.76062	-6.99857	0.000314258	0.00608269	0.0708241
AL360091.2	3.80835	3.1839	6.998	0.000314404	0.00608269	0.0703008
DOCK9-DT	-3.54789	2.34333	-6.99169	0.000316043	0.00610696	0.064449
AL353719.1	-2.25015	2.48242	-6.98819	0.000316956	0.00611713	0.0612066
PVT1	-2.03379	2.70035	-6.97963	0.000319202	0.00615298	0.0532635
AC027801.1	1.6401	3.3864	6.97721	0.000319839	0.00615778	0.0510196
LINC00272	1.58708	0.793539	6.95609	0.00032547	0.00625858	0.0313879
AC145207.5	-1.13826	3.45045	-6.94661	0.000328035	0.00628973	0.0225575
AC011477.1	-2.14214	4.18757	-6.94549	0.000328337	0.00628973	0.0215212
LINC01624	-2.06956	1.55783	-6.94276	0.000329082	0.00628973	0.0189711
AC006141.1	1.60586	3.25847	6.94167	0.00032938	0.00628973	0.0179558
AC090220.1	2.31582	2.84216	6.94133	0.000329471	0.00628973	0.0176422
AC105345.1	-1.45079	1.02442	-6.93906	0.000330092	0.00629399	0.0155256
AC100861.1	-1.72091	2.74696	-6.92325	0.000334451	0.00636365	0.000769314
ZSWIM8-AS1	1.36304	5.31275	6.9229	0.000334548	0.00636365	0.0004406
KIRREL3-AS1	1.45396	0.726982	6.90987	0.000338191	0.00642523	-0.0117412
LINC01237	-2.36349	1.54048	-6.90766	0.000338813	0.00642641	-0.0138075
AP003117.1	3.50752	4.15106	6.90676	0.000339065	0.00642641	-0.0146421
AC135048.1	-1.25414	5.70246	-6.90511	0.000339532	0.00642759	-0.0161926
AC009090.5	1.66022	3.25294	6.89043	0.000343708	0.00649887	-0.0299411
ST3GAL5-AS1	-2.70484	1.49579	-6.88746	0.000344559	0.00650617	-0.0327237
LINC00863	-1.54365	3.92418	-6.88623	0.000344915	0.00650617	-0.033886
AC007598.1	2.47148	1.23574	6.88106	0.000346405	0.0065265	-0.0387322
AC012313.5	-2.26599	1.80633	-6.87254	0.000348877	0.00655911	-0.046732
AC020659.1	-4.48046	3.10563	-6.87224	0.000348964	0.00655911	-0.0470103
AP001063.1	2.22014	1.36483	6.86457	0.000351209	0.00659349	-0.0542239
AC243830.2	-1.39931	0.699657	-6.8625	0.000351817	0.00659709	-0.0561699
AC099689.1	3.09745	2.59973	6.85715	0.000353395	0.00661884	-0.0612027
AC004951.4	2.08376	1.10276	6.85512	0.000353996	0.00662228	-0.0631148
AL136115.2	2.76997	3.88226	6.85301	0.000354623	0.00662618	-0.0651044
KLF3-AS1	-1.33974	1.99787	-6.83841	0.000358987	0.00669982	-0.0788602
AL035661.1	3.24697	4.49129	6.83545	0.000359878	0.00670308	-0.0816487
AC008115.3	-1.38731	7.36846	-6.83502	0.000360007	0.00670308	-0.0820535
AC106791.1	-2.32269	1.97694	-6.82099	0.000364274	0.00677456	-0.0953052
AL358472.2	-2.5055	1.77981	-6.81263	0.000366844	0.00681436	-0.103212
AC091925.2	3.14918	3.94457	6.8082	0.000368213	0.00682565	-0.1074
SNHG21	-1.69457	3.05298	-6.80788	0.000368313	0.00682565	-0.107707
SNHG4	-2.45144	2.32021	-6.8006	0.000370577	0.00685548	-0.114596
AC016876.1	-1.77511	3.08242	-6.7995	0.000370919	0.00685548	-0.115634
AC087392.5	-3.0341	2.4928	-6.79854	0.000371221	0.00685548	-0.116551
AL121845.1	-3.68186	2.76873	-6.78621	0.000375098	0.006919	-0.128233
AC004466.2	2.00314	4.39569	6.77974	0.000377154	0.00694884	-0.13438
AC026803.1	1.32808	3.19439	6.77237	0.000379508	0.0069841	-0.14138
AC006059.3	1.74368	0.871842	6.75575	0.000384881	0.00706853	-0.157189
AC120057.3	1.47391	2.49467	6.75542	0.000384988	0.00706853	-0.157503
AC005746.1	2.17028	1.63263	6.75315	0.000385728	0.0070739	-0.159659
AC004224.2	-2.3836	3.72919	-6.74794	0.000387434	0.00709699	-0.164624
AL031658.1	2.5172	1.2586	6.743	0.000389059	0.00711853	-0.169331
AC016738.1	1.2919	0.645948	6.74007	0.000390027	0.007128	-0.172124
AL021368.3	-1.19846	0.724288	-6.73638	0.000391252	0.00714214	-0.17565
AC097382.1	3.72809	2.41414	6.73316	0.000392321	0.00715343	-0.178719
E2F3-IT1	4.28347	3.52656	6.73081	0.000393105	0.00715948	-0.180964
AC103996.2	4.75994	3.86152	6.72938	0.000393583	0.00715996	-0.18233
PCBP2-OT1	1.52439	4.92235	6.72487	0.000395092	0.00717917	-0.186634
AL021368.4	-3.48841	2.96654	-6.7192	0.000397001	0.00720558	-0.192052
RNF32-AS1	2.07176	1.2372	6.7161	0.00039805	0.00720812	-0.195021
Z97198.1	-2.70495	1.35247	-6.71388	0.000398802	0.00721349	-0.197144
AL662797.1	1.36407	3.41209	6.71189	0.000399478	0.00721748	-0.199047
AP001273.1	-1.74127	2.5697	-6.70775	0.000400888	0.00723471	-0.20301
SEPTIN14P5	5.16572	3.3071	6.70547	0.000401666	0.0072376	-0.20519
AL357033.1	1.99911	1.65143	6.70249	0.000402688	0.0072376	-0.208047
LINC00544	-1.44755	0.874982	-6.70175	0.000402942	0.0072376	-0.208757
KRT73-AS1	-2.26217	1.13108	-6.70135	0.000403078	0.0072376	-0.209136
FIRRE	-1.5424	1.0757	-6.70061	0.000403332	0.0072376	-0.209845
NRSN2-AS1	-2.45112	2.03723	-6.6963	0.000404819	0.00725607	-0.213983
MIR181A1HG	1.76878	3.9692	6.69112	0.000406609	0.00727992	-0.218944
MIR548A1HG	2.49164	1.24582	6.68886	0.000407394	0.00728573	-0.221111
AC026474.1	2.84098	2.05439	6.67574	0.000411985	0.00735125	-0.233713
ZNF436-AS1	-2.17212	1.87166	-6.671	0.000413657	0.00737278	-0.238266
AC022098.2	-2.55349	1.67134	-6.66875	0.000414454	0.00737578	-0.240429
AC239868.1	-1.7556	2.94807	-6.6679	0.000414756	0.00737578	-0.24125
AL121990.1	1.66878	1.13594	6.65501	0.000419357	0.00744923	-0.253652
AC004771.2	-2.55532	3.44807	-6.65106	0.000420778	0.00745842	-0.257457
AATBC	-2.45132	3.22511	-6.65096	0.000420816	0.00745842	-0.257558
MIR4453HG	-1.84446	3.74337	-6.64786	0.000421933	0.00746987	-0.260538
AC010175.1	-2.93168	2.07964	-6.64607	0.000422581	0.00747299	-0.262264
AC073342.1	2.41096	3.89557	6.64063	0.000424558	0.00749898	-0.267512
AC012645.1	-2.8031	4.66986	-6.63741	0.000425733	0.00749898	-0.270617
AC009118.3	-2.58237	1.89628	-6.63739	0.000425742	0.00749898	-0.270643
AL391832.2	1.16376	4.26569	6.63683	0.000425944	0.00749898	-0.271176
AL109923.1	1.85576	4.51555	6.63188	0.000427761	0.00752107	-0.275962
AC090152.1	-3.2717	2.03847	-6.63082	0.000428148	0.00752107	-0.276978
ZDHHC20-IT1	4.17228	2.7197	6.62421	0.00043059	0.00755559	-0.283371
AL451085.2	-1.68294	3.31442	-6.62163	0.000431544	0.00756395	-0.28586
AC116407.4	1.22373	4.5081	6.62017	0.000432086	0.00756508	-0.287271
AC007283.1	2.76551	8.6605	6.61819	0.000432825	0.00756966	-0.289193
AC145098.2	1.56837	3.81362	6.6156	0.000433791	0.00757819	-0.291699
AL022328.3	3.11673	2.56337	6.60543	0.000437605	0.00762847	-0.301539
AC005332.1	-2.40359	2.35599	-6.60418	0.000438075	0.00762847	-0.302747
USP30-AS1	-4.85578	3.11488	-6.60408	0.000438114	0.00762847	-0.302846
AP000240.1	3.06113	3.13486	6.6002	0.000439581	0.00764393	-0.306605
LINC02611	-2.21635	1.78926	-6.59806	0.000440395	0.00764393	-0.308685
AC090617.5	1.45068	0.725339	6.59786	0.000440469	0.00764393	-0.308875
AL691432.2	-1.42781	4.03515	-6.59665	0.000440931	0.00764393	-0.310052
NAGPA-AS1	-1.22536	0.631921	-6.58908	0.000443818	0.00768556	-0.317388
LINC01684	-1.33946	0.751328	-6.58664	0.000444757	0.00769343	-0.319765
LINC02812	-2.6184	1.88792	-6.5706	0.000450966	0.00779232	-0.335351
PAXIP1-AS2	-2.21279	3.11556	-6.55936	0.000455373	0.0078599	-0.346282
AC006372.3	1.85332	0.926662	6.54553	0.000460869	0.00793746	-0.359767
AC116025.2	2.26851	1.33435	6.54295	0.000461902	0.00794662	-0.362284
AL096865.1	-3.01207	2.45935	-6.53514	0.000465042	0.00799196	-0.369899
AL161644.1	-3.03583	1.55997	-6.5303	0.000467003	0.00801697	-0.37463
AC090970.1	3.80217	2.25786	6.52295	0.000469999	0.00805966	-0.381817
ANAPC1P2	-1.56247	6.70429	-6.51504	0.000473244	0.00810654	-0.38955
AC135507.1	1.74882	4.90791	6.50507	0.000477374	0.00816261	-0.399319
AL731557.1	-4.15002	2.95151	-6.50342	0.000478062	0.00816261	-0.400937
AC007342.6	1.47604	2.09481	6.48794	0.000484564	0.00826472	-0.416121
FLJ38576	-1.1788	0.901483	-6.48529	0.000485689	0.00827499	-0.418726
AC048382.5	-1.49908	1.54594	-6.48065	0.000487661	0.00829967	-0.423281
INE1	1.25521	5.57098	6.47321	0.000490847	0.00833038	-0.4306
WARS2-AS1	-2.32958	1.75724	-6.47275	0.000491043	0.00833038	-0.431048
MIR4458HG	-1.22002	0.61001	-6.4681	0.000493046	0.00835059	-0.435623
RAB33B-AS1	1.48802	3.32065	6.46754	0.000493288	0.00835059	-0.436174
BX539320.1	2.03893	5.30985	6.46099	0.000496129	0.00838971	-0.442627
AC009237.14	-1.56901	1.10778	-6.45352	0.000499389	0.00843584	-0.449988
AC136475.1	1.64458	5.49634	6.4521	0.000500013	0.00843738	-0.451391
AL513165.1	-4.16911	3.18237	-6.44873	0.000501491	0.00845317	-0.454708
AC078785.1	-1.76921	0.884605	-6.44206	0.000504439	0.00848497	-0.461296
AC011466.4	2.13652	2.61846	6.43662	0.000506855	0.00850204	-0.466665
FOXP1-IT1	2.02712	3.74493	6.43527	0.000507456	0.00850204	-0.467997
MRPL20-AS1	-1.70604	4.05025	-6.43495	0.0005076	0.00850204	-0.468316
AC241585.2	-2.51898	4.92751	-6.4314	0.000509185	0.00851957	-0.471818
CHRM3-AS2	-3.52292	2.58242	-6.4291	0.000510218	0.00852225	-0.474097
AC016542.1	2.3385	1.71225	6.42865	0.000510421	0.00852225	-0.474543
AC024909.1	-1.57639	3.10573	-6.42742	0.000510971	0.00852246	-0.475754
AC091982.3	-1.64231	3.70384	-6.41441	0.000516861	0.00861164	-0.488633
AC006538.3	2.45733	1.58836	6.40842	0.000519598	0.00864814	-0.494568
AL603839.4	2.21169	1.24731	6.40602	0.000520699	0.00865737	-0.496945
AC124319.1	2.80565	3.07733	6.40073	0.000523137	0.00868479	-0.502196
AC011676.5	1.76759	4.30985	6.40006	0.000523445	0.00868479	-0.502855
AC087500.1	-2.62251	1.8062	-6.39471	0.000525923	0.0087168	-0.508164
AC005332.7	-2.61527	2.19538	-6.39292	0.000526755	0.00871859	-0.50994
LINC00937	2.84553	4.61362	6.39211	0.000527132	0.00871859	-0.510744
SNHG11	-1.99563	3.0768	-6.38779	0.000529149	0.00873794	-0.515034
AC020915.2	-1.05551	1.76792	-6.38724	0.000529405	0.00873794	-0.515578
AC008764.7	2.35863	2.52285	6.37955	0.000533021	0.00878847	-0.523227
AC007996.1	-1.06381	0.685393	-6.37441	0.00053545	0.00881768	-0.528335
LINC01882	-2.81872	1.69916	-6.37345	0.000535905	0.00881768	-0.529291
AL359532.1	3.25507	3.08275	6.36205	0.000541349	0.00889799	-0.540645
SNHG12	-1.73664	4.25226	-6.35071	0.000546826	0.00897872	-0.551956
AC005962.1	-1.75267	1.0654	-6.34505	0.000549579	0.00900525	-0.557597
AC093525.7	1.88012	2.85556	6.33204	0.000555974	0.00910063	-0.570596
AC000403.1	2.20132	1.53215	6.32916	0.000557401	0.00911458	-0.573476
SYNGAP1-AS1	-2.18222	1.90367	-6.32315	0.000560395	0.00914681	-0.579493
AL390955.2	-1.45832	0.875261	-6.32289	0.000560527	0.00914681	-0.579758
LINC01003	-1.39416	4.44852	-6.31969	0.000562128	0.0091635	-0.582962
AC078852.2	3.68693	2.66209	6.31683	0.000563561	0.00917727	-0.585822
AL136984.1	3.24816	3.78029	6.3157	0.000564131	0.00917727	-0.586958
AL731571.1	1.89554	2.38153	6.30065	0.000571759	0.00929137	-0.602047
AL109804.1	-1.75476	3.37026	-6.29683	0.000573712	0.00930448	-0.605877
AC007342.5	-2.59704	2.91737	-6.29467	0.000574823	0.00931295	-0.608049
FUT8-AS1	-2.51065	1.78254	-6.29344	0.000575454	0.00931365	-0.609282
AL020997.2	1.8201	4.47474	6.29201	0.000576192	0.00931608	-0.610721
ARMCX5-GPRASP2	-2.23125	2.48949	-6.28587	0.000579363	0.00934765	-0.616887
AL162424.1	-2.12569	4.61328	-6.28535	0.000579635	0.00934765	-0.617415
MORF4L2-AS1	-1.67734	0.938547	-6.28481	0.000579914	0.00934765	-0.617955
AC092384.3	1.96177	2.62886	6.27901	0.000582935	0.00938679	-0.623791
AC007541.1	-2.00265	1.23152	-6.2742	0.000585452	0.00941775	-0.628631
AL353803.5	3.46771	3.24007	6.26281	0.000591461	0.00948553	-0.640101
AC243919.2	-2.04981	1.02491	-6.26144	0.000592192	0.00948765	-0.641488
AC010542.4	1.33944	1.03356	6.25853	0.000593742	0.00950288	-0.644425
AC092803.1	-1.33967	1.31438	-6.24919	0.000598744	0.00957325	-0.653846
AC010422.7	-2.01977	3.68624	-6.24756	0.000599625	0.00957695	-0.655498
SMC5-AS1	-1.46578	0.863223	-6.24652	0.000600183	0.00957695	-0.656543
AL021707.8	-2.18835	6.60159	-6.24006	0.000603683	0.00962309	-0.663073
AC125257.1	-1.53615	3.74063	-6.23495	0.000606465	0.00965161	-0.668237
AC073487.1	1.59606	3.67831	6.23454	0.00060669	0.00965161	-0.668654
LINC00494	-1.50115	0.935762	-6.2252	0.000611818	0.00971368	-0.678106
AC079360.1	2.00723	1.32742	6.21952	0.000614956	0.00974769	-0.683852
LHFPL3-AS2	1.94367	1.10056	6.2191	0.000615191	0.00974769	-0.68428
PDXDC2P-NPIPB14P	-1.20028	4.39752	-6.20427	0.000623488	0.0098693	-0.699326
AL157786.1	1.18268	0.896537	6.2009	0.000625386	0.00988946	-0.702739
NUTM2A-AS1	-1.95254	4.89625	-6.19359	0.00062954	0.00994523	-0.710174
SUGT1P4-STRA6LP-CCDC180	-2.85362	2.28124	-6.18499	0.000634461	0.010013	-0.718919
AL359513.1	-3.18566	2.98587	-6.17956	0.000637587	0.0100522	-0.724438
AC073857.1	-2.20196	2.83243	-6.17524	0.000640093	0.0100675	-0.728843
LINC01703	2.38403	1.46126	6.1746	0.00064046	0.0100675	-0.729486
AC015871.4	3.08885	3.24857	6.1722	0.000641862	0.0100796	-0.73194
CYP4A22-AS1	-3.26991	1.63495	-6.16547	0.000645791	0.0101212	-0.738793
AP002807.1	1.3991	7.7212	6.15932	0.000649409	0.0101394	-0.745067
AC108463.3	2.06339	1.92592	6.15877	0.000649736	0.0101394	-0.745631
AC004233.2	2.30939	3.78059	6.15807	0.000650151	0.0101394	-0.746349
AC009403.1	-1.56908	2.95355	-6.1534	0.000652914	0.0101725	-0.751109
AL139246.5	-2.16437	5.25752	-6.14289	0.000659192	0.0102602	-0.761855
AL133445.2	2.47966	5.52	6.14136	0.000660109	0.0102644	-0.763416
AL807757.2	1.67875	1.1641	6.14007	0.000660884	0.0102664	-0.764733
RNF216-IT1	2.20314	3.00937	6.12829	0.000668022	0.0103671	-0.776794
AL133353.1	1.71725	0.858623	6.12354	0.000670924	0.0104019	-0.78166
AC010247.2	-2.08415	2.71331	-6.11702	0.000674925	0.0104531	-0.788336
LINC01534	-2.6679	2.16091	-6.11593	0.000675602	0.0104531	-0.789462
USP46-DT	-2.33993	1.16997	-6.11495	0.000676203	0.0104531	-0.79046
Z69720.1	2.46463	2.3086	6.11078	0.00067879	0.0104829	-0.794747
LINC00896	-1.84683	1.45666	-6.10948	0.000679598	0.0104851	-0.796082
CENATAC-DT	-2.51911	1.86162	-6.10813	0.000680433	0.0104878	-0.797461
HCG25	-1.83999	1.55686	-6.10571	0.000681942	0.0105008	-0.799947
AC009948.3	1.96374	3.39455	6.08974	0.000691987	0.0106452	-0.816362
AL390198.1	-1.39129	0.695647	-6.0881	0.000693026	0.0106508	-0.818048
AL353898.3	1.94647	3.77219	6.08644	0.000694083	0.0106567	-0.819758
RHOA-IT1	1.39088	4.66859	6.07793	0.000699523	0.0107299	-0.828522
AL391684.1	-1.194	0.955751	-6.07463	0.000701643	0.010752	-0.831919
AL139022.2	2.04036	1.82657	6.07351	0.000702369	0.0107527	-0.833079
AC092143.3	1.36809	3.90593	6.06803	0.000705912	0.0107965	-0.838727
RAP2C-AS1	1.68175	2.5116	6.06138	0.000710241	0.0108498	-0.845589
AC090181.2	1.48192	2.01753	6.06057	0.000710769	0.0108498	-0.846423
AC055811.3	3.79227	2.92659	6.04439	0.000721438	0.0110021	-0.863146
AC139720.1	-3.58526	2.10108	-6.04053	0.000724009	0.0110307	-0.867139
AC092118.1	1.12064	0.560321	6.03536	0.00072747	0.0110728	-0.872492
AC005332.6	-1.44819	5.67332	-6.03207	0.000729685	0.0110958	-0.875904
AC024598.1	-2.52376	1.49254	-6.02826	0.000732251	0.0111242	-0.879843
AC108134.3	-1.9657	5.98481	-6.02659	0.000733387	0.0111308	-0.881583
AC080023.1	2.29241	4.31589	6.02155	0.000736805	0.0111719	-0.886801
AC130352.1	1.57524	2.51345	6.0201	0.000737792	0.0111762	-0.888304
AC074044.1	-2.06206	1.03103	-6.01237	0.000743086	0.0112456	-0.896327
CEBPB-AS1	1.03089	3.37717	6.00874	0.000745588	0.0112727	-0.900099
AL445253.1	1.7167	0.985485	6.00486	0.000748273	0.0113026	-0.904134
Z84723.1	-1.59547	3.92627	-6.00258	0.000749856	0.0113049	-0.906505
HLA-F-AS1	-1.93445	2.56607	-6	0.000751652	0.0113212	-0.90919
AC092332.1	1.80844	1.32537	5.99848	0.000752708	0.0113264	-0.910765
AC012306.2	-1.73819	4.49926	-5.99191	0.000757305	0.0113779	-0.917598
AC139530.1	-1.05035	4.4162	-5.99141	0.00075766	0.0113779	-0.918124
AL391988.1	2.53792	3.95363	5.9895	0.000759005	0.0113779	-0.920114
GSEC	1.49182	4.65931	5.97873	0.00076663	0.0114705	-0.93133
AL353801.2	1.87765	0.938826	5.97701	0.000767858	0.011478	-0.933126
AL512306.3	1.62939	3.86084	5.97342	0.000770419	0.011496	-0.936863
AL109806.1	1.0207	4.61398	5.9733	0.000770508	0.011496	-0.936992
AL031848.2	-2.47685	1.56472	-5.96341	0.000777627	0.0115912	-0.947312
AC013451.2	2.94737	2.2319	5.96241	0.000778356	0.0115912	-0.948363
AC020951.1	-1.59674	2.72349	-5.95833	0.000781314	0.0116243	-0.952619
NPTN-IT1	1.63015	5.18421	5.95706	0.000782242	0.0116272	-0.953951
AC073439.1	1.43286	2.3042	5.95514	0.000783644	0.0116371	-0.95596
AL590822.2	2.12909	1.69155	5.94972	0.000787614	0.0116817	-0.961629
AC078802.1	-1.6894	1.02007	-5.94903	0.000788118	0.0116817	-0.962347
AC139795.2	-1.25161	2.43811	-5.94283	0.000792689	0.0117286	-0.968835
AL133551.1	1.44666	2.26652	5.94273	0.000792762	0.0117286	-0.968939
AC067817.1	3.96823	3.67053	5.93351	0.000799616	0.011819	-0.978597
NRAV	-2.47168	1.70528	-5.9302	0.000802097	0.0118446	-0.982072
Z85996.2	1.28485	0.830703	5.92268	0.000807751	0.011917	-0.989952
LINC02586	1.37988	0.793686	5.91804	0.000811267	0.0119577	-0.994825
AC083900.1	2.59331	2.39387	5.90299	0.000822792	0.0120922	-1.01065
HYI-AS1	1.78467	1.13849	5.90214	0.000823448	0.0120922	-1.01154
AL122035.2	-1.07488	1.98407	-5.89865	0.000826149	0.0121207	-1.01522
LINC00638	-1.14264	0.833981	-5.87906	0.000841487	0.0123343	-1.03585
FAM27C	1.43915	0.890357	5.87599	0.000843922	0.0123585	-1.03909
AC130448.1	2.65567	4.15988	5.87407	0.000845454	0.0123674	-1.04112
AC130371.2	1.82007	5.55251	5.87271	0.000846533	0.0123674	-1.04255
AC003102.1	1.51706	3.80172	5.87229	0.000846866	0.0123674	-1.043
AL035701.1	-2.02889	1.34493	-5.8685	0.000849896	0.0124002	-1.047
AC011337.1	2.76952	2.18149	5.85479	0.000860952	0.0125499	-1.0615
AC068025.2	3.27224	3.26155	5.84513	0.000868834	0.0126518	-1.07172
AP005899.1	1.75645	0.878224	5.84428	0.000869535	0.0126518	-1.07262
AC099541.1	1.47228	0.73614	5.83568	0.000876632	0.0127433	-1.08174
AC118344.1	2.14868	3.04147	5.82153	0.000888448	0.0129033	-1.09675
AP000355.1	3.85227	2.83911	5.81571	0.000893364	0.0129628	-1.10294
ZNF426-DT	-1.71917	1.37794	-5.8129	0.00089575	0.0129855	-1.10593
AC005840.2	2.21899	2.60741	5.80968	0.000898485	0.0130133	-1.10935
AC004233.1	2.02737	1.01368	5.80721	0.000900596	0.0130319	-1.11198
AC097634.3	1.46806	0.953673	5.80487	0.000902597	0.0130489	-1.11447
AL135925.1	-1.38932	3.79767	-5.79721	0.000909191	0.0131323	-1.12263
AL132639.2	1.41193	2.79298	5.79598	0.000910253	0.0131357	-1.12394
AC104695.2	2.31921	3.25549	5.78884	0.000916447	0.013213	-1.13154
AC092120.1	3.15757	3.58356	5.77877	0.000925281	0.0133283	-1.1423
AL133338.1	-1.75125	1.28472	-5.75774	0.000944018	0.0135735	-1.16477
LINC00663	-1.89499	1.41887	-5.74884	0.000952079	0.013677	-1.1743
Z93930.3	-1.81264	2.6839	-5.74254	0.000957837	0.0137472	-1.18106
AC108673.2	2.79966	4.63347	5.7391	0.000960995	0.0137801	-1.18475
AC005840.4	-1.85374	4.27019	-5.73751	0.000962459	0.0137886	-1.18646
AL121753.2	1.34598	4.7501	5.73551	0.000964302	0.0138025	-1.1886
AL450469.1	2.18111	1.09056	5.72851	0.000970789	0.0138703	-1.19611
AC025423.1	2.28847	3.35446	5.7233	0.000975653	0.0139186	-1.20172
AL157827.2	1.34621	1.03381	5.72213	0.000976746	0.0139186	-1.20297
TSC22D1-AS1	-1.22816	0.832063	-5.72206	0.000976807	0.0139186	-1.20304
AC104463.2	-2.5955	1.77556	-5.72079	0.000978004	0.0139232	-1.20441
TMEM72-AS1	1.18938	0.614979	5.71827	0.000980372	0.0139443	-1.20712
AC108488.1	-1.84864	1.60279	-5.71643	0.000982103	0.0139463	-1.2091
U47924.3	2.51659	1.76109	5.71625	0.00098227	0.0139463	-1.20929
RFX3-AS1	-2.65004	2.86355	-5.71029	0.000987906	0.0140115	-1.2157
AC009962.1	1.09599	1.59942	5.70927	0.000988875	0.0140115	-1.2168
AC020910.5	-3.01389	2.75283	-5.7086	0.000989514	0.0140115	-1.21753
AC243547.2	-2.62698	1.31349	-5.70359	0.000994285	0.0140665	-1.22292
AL590326.1	-1.96351	1.7919	-5.70173	0.000996071	0.0140707	-1.22493
AL645939.5	-1.65521	1.67654	-5.70142	0.000996363	0.0140707	-1.22526
EIF1B-AS1	1.54891	2.80244	5.69944	0.000998264	0.014085	-1.22739
PACERR	-2.9824	3.08296	-5.69164	0.00100579	0.0141785	-1.23581
AL359183.1	-1.79829	1.55431	-5.6856	0.00101165	0.0142359	-1.24232
OIP5-AS1	-2.22982	5.43851	-5.6843	0.00101292	0.0142412	-1.24373
MMADHC-DT	1.38789	0.693945	5.67789	0.0010192	0.0143115	-1.25065
ARHGEF35-AS1	-2.64049	2.85829	-5.67735	0.00101973	0.0143115	-1.25124
AL135791.1	-2.72485	1.75224	-5.67419	0.00102285	0.0143316	-1.25465
AC016831.4	2.20214	5.90803	5.66593	0.00103103	0.0144317	-1.26358
LINC02520	-2.384	1.57393	-5.65794	0.00103903	0.0145308	-1.27224
AC019294.3	1.64335	1.19256	5.64011	0.00105711	0.0147706	-1.29157
AL662884.3	-1.72978	0.864891	-5.63626	0.00106107	0.0148128	-1.29575
AC234781.1	2.04225	2.05153	5.63237	0.00106507	0.0148557	-1.29997
VAV3-AS1	1.38878	0.940543	5.63136	0.00106612	0.0148572	-1.30108
DLEU2	-1.31014	6.33625	-5.62904	0.00106852	0.0148775	-1.30359
AC106028.3	2.09947	2.70901	5.62749	0.00107013	0.0148869	-1.30528
AC005046.1	2.42957	2.35735	5.62341	0.00107438	0.0149177	-1.30972
AC068020.1	2.05965	1.50524	5.6227	0.00107511	0.0149177	-1.31049
DPYD-IT1	2.34344	3.75793	5.62265	0.00107517	0.0149177	-1.31055
AC121761.1	-1.38793	3.35718	-5.61423	0.001084	0.0150271	-1.31971
RAB30-DT	-2.07551	2.8794	-5.60063	0.00109844	0.0152113	-1.33453
AL132780.5	1.56775	3.01792	5.59943	0.00109973	0.0152113	-1.33584
LINC00092	-1.16719	0.847761	-5.59902	0.00110016	0.0152113	-1.33629
AC005899.7	1.74913	3.12556	5.59752	0.00110177	0.0152202	-1.33792
AC025164.1	-1.11849	1.37274	-5.59546	0.00110398	0.0152321	-1.34017
AL133243.4	1.66553	2.90328	5.59481	0.00110468	0.0152321	-1.34088
AL359504.1	-2.39605	1.19803	-5.59404	0.00110551	0.0152321	-1.34172
AC145098.1	2.36819	1.81492	5.58729	0.00111281	0.0153193	-1.34909
AC012358.1	1.74213	0.871067	5.58456	0.00111579	0.0153469	-1.35208
MCPH1-AS1	-1.54373	1.22842	-5.58084	0.00111984	0.0153724	-1.35614
KIAA1614-AS1	2.08204	3.16733	5.58009	0.00112066	0.0153724	-1.35696
LINC00205	-1.65826	3.1917	-5.57988	0.00112089	0.0153724	-1.3572
AL161781.1	-1.39577	0.697885	-5.5793	0.00112152	0.0153724	-1.35782
AL355574.1	-3.04889	1.96481	-5.57647	0.00112463	0.0154017	-1.36092
AC103858.2	1.87497	1.40149	5.57527	0.00112595	0.0154064	-1.36223
AC091181.1	1.08074	2.55447	5.57403	0.00112731	0.0154118	-1.36359
AC139887.4	1.90884	2.53078	5.57166	0.00112993	0.0154343	-1.36619
AP002336.1	3.32864	3.074	5.56724	0.00113482	0.0154877	-1.37103
LINC01814	1.35926	0.984113	5.55757	0.00114561	0.0156119	-1.38162
AC004967.2	-1.19774	3.90324	-5.55712	0.00114611	0.0156119	-1.38211
AC109927.1	2.16695	1.61424	5.55644	0.00114688	0.0156119	-1.38286
AC107464.2	-3.12064	2.6601	-5.54245	0.00116271	0.0158003	-1.39821
MIR194-2HG	2.46699	2.03483	5.53421	0.00117215	0.015915	-1.40727
AC005546.1	2.21667	2.22126	5.53258	0.00117403	0.0159268	-1.40905
CCDC183-AS1	-1.19635	3.16893	-5.53041	0.00117653	0.0159471	-1.41144
AC112496.1	2.3855	5.58642	5.5243	0.00118362	0.0160294	-1.41817
LINC02785	1.63604	1.89655	5.5188	0.00119004	0.0160948	-1.42422
AL627309.1	1.97288	2.53986	5.51843	0.00119048	0.0160948	-1.42464
MIR762HG	-2.47969	2.40628	-5.51269	0.00119722	0.0161722	-1.43096
AC012313.3	-1.92823	1.55895	-5.51149	0.00119864	0.0161776	-1.43229
AC025171.2	-1.12241	4.54731	-5.50963	0.00120083	0.0161903	-1.43433
ATXN1-AS1	-1.81619	3.41456	-5.50896	0.00120163	0.0161903	-1.43507
AP003086.1	3.68828	1.84414	5.49885	0.00121366	0.0163277	-1.44623
AC136475.3	-1.71491	7.56825	-5.49866	0.00121389	0.0163277	-1.44643
LINC02648	-3.43678	2.16705	-5.49717	0.00121568	0.016338	-1.44809
AC023509.3	-2.0044	3.52553	-5.48833	0.00122634	0.0164672	-1.45785
AC010997.6	2.12459	2.54269	5.48441	0.00123109	0.016517	-1.46218
AP001350.2	1.53116	2.34881	5.48236	0.00123359	0.0165366	-1.46446
AC116651.1	2.98394	4.5662	5.474	0.00124383	0.0166597	-1.47371
AC010636.2	-4.11712	4.26513	-5.46807	0.00125115	0.0167296	-1.48028
DLEU1	-1.60926	2.07936	-5.46624	0.00125342	0.0167458	-1.48231
AC007349.4	2.56609	1.69281	5.46065	0.00126038	0.0168104	-1.48851
LINC01569	-1.52653	1.63103	-5.45951	0.0012618	0.0168152	-1.48977
AC005912.2	1.0554	0.632154	5.45752	0.0012643	0.0168229	-1.49198
CDC37L1-DT	-2.6679	2.08623	-5.45735	0.00126452	0.0168229	-1.49217
AC245884.10	2.72878	1.62882	5.45651	0.00126557	0.0168229	-1.4931
AL442125.2	4.14918	2.76516	5.44698	0.00127759	0.0169685	-1.50368
AL049651.1	2.24957	2.02126	5.44321	0.00128238	0.0170179	-1.50787
AC008608.2	-1.46454	0.732269	-5.43914	0.00128759	0.0170664	-1.5124
ZNF793-AS1	-1.60963	0.804816	-5.43866	0.0012882	0.0170664	-1.51293
AC008735.1	2.96356	2.42027	5.43614	0.00129143	0.017095	-1.51574
AP001893.1	-2.78978	1.78633	-5.43128	0.00129768	0.0171634	-1.52114
AC022182.2	-2.74488	2.90569	-5.42402	0.00130709	0.0172735	-1.52923
AC004461.2	1.08014	5.69139	5.41784	0.00131517	0.0173658	-1.53612
AC243967.2	2.06688	1.03344	5.417	0.00131628	0.0173659	-1.53706
AL139424.3	2.85359	1.57719	5.41249	0.0013222	0.0174295	-1.54208
PCOLCE-AS1	-1.25123	0.858795	-5.40606	0.00133072	0.0175222	-1.54926
AC011477.3	-1.64718	2.8564	-5.40408	0.00133334	0.0175222	-1.55147
AC087289.1	1.95258	3.32811	5.40392	0.00133356	0.0175222	-1.55165
UBE2D3-AS1	-1.29852	2.9641	-5.40385	0.00133365	0.0175222	-1.55173
TTC28-AS1	-1.48278	2.53946	-5.398	0.00134147	0.0176103	-1.55827
AC036176.1	-2.08851	1.04426	-5.39662	0.00134332	0.0176199	-1.55981
AC090616.6	1.16697	2.99806	5.39134	0.00135042	0.0176839	-1.56571
MAN2A1-DT	-1.00766	0.503832	-5.38125	0.00136413	0.0178486	-1.57701
AC019278.1	3.39306	1.88364	5.38042	0.00136526	0.0178487	-1.57794
AL122035.1	-2.31789	2.61439	-5.37671	0.00137035	0.0178927	-1.58209
AC004067.1	-2.41682	2.4742	-5.3708	0.00137849	0.0179592	-1.58872
AC132872.2	1.17059	2.91159	5.37062	0.00137873	0.0179592	-1.58892
AC044849.1	-2.14851	3.79142	-5.37015	0.00137939	0.0179592	-1.58945
AC025171.3	-2.38009	2.2626	-5.369	0.00138097	0.0179651	-1.59073
AL512625.2	-3.19604	2.34097	-5.36421	0.00138763	0.0180369	-1.59611
AL355310.3	1.92561	1.22195	5.36339	0.00138877	0.018037	-1.59703
AC007952.4	-1.32051	6.63852	-5.36191	0.00139083	0.0180487	-1.59869
AC007566.1	-1.79563	3.22603	-5.36111	0.00139196	0.0180487	-1.59959
LRRC8D-DT	-1.58711	2.24196	-5.36018	0.00139325	0.0180507	-1.60063
AC022966.1	1.34643	1.00634	5.35631	0.00139868	0.0181062	-1.60498
AC007342.9	-2.27739	2.50925	-5.35416	0.00140169	0.0181305	-1.60739
AL353597.1	-2.74288	1.97189	-5.35277	0.00140366	0.0181411	-1.60896
TLR8-AS1	1.81653	1.24766	5.3503	0.00140715	0.0181713	-1.61173
TUBA3FP	-1.41857	0.948435	-5.34888	0.00140915	0.0181825	-1.61333
AC083880.1	-2.46517	2.94679	-5.34295	0.00141758	0.0182763	-1.62
AC012467.2	-1.12265	2.50921	-5.3418	0.00141923	0.0182827	-1.6213
AP000437.1	2.46657	2.55792	5.34077	0.00142071	0.0182868	-1.62246
LINC02432	-1.6658	2.32193	-5.33598	0.00142757	0.0183492	-1.62785
AL133520.1	-3.08138	2.40568	-5.33577	0.00142786	0.0183492	-1.62808
AC090229.1	1.30971	1.50406	5.33061	0.00143531	0.0184249	-1.63389
AC004491.1	1.91622	2.90787	5.33008	0.00143608	0.0184249	-1.6345
AC100778.2	2.70143	2.06894	5.32682	0.00144081	0.0184706	-1.63817
NUP153-AS1	-1.98689	2.52827	-5.32574	0.00144238	0.0184711	-1.63939
SUV39H2-DT	-2.09865	1.55598	-5.32519	0.00144318	0.0184711	-1.64001
AC107959.3	-1.8108	4.59291	-5.32242	0.00144721	0.0185077	-1.64312
AC104958.2	-2.28749	1.66152	-5.31641	0.00145601	0.0186053	-1.64991
A2M-AS1	-2.31818	2.93175	-5.3028	0.00147618	0.0188478	-1.66529
AC010422.4	2.46628	2.44505	5.29893	0.00148197	0.0188912	-1.66966
AC245100.6	-2.70144	5.09453	-5.29809	0.00148323	0.0188921	-1.67061
AL022310.1	1.82442	1.66707	5.29136	0.00149337	0.0189924	-1.67823
AP001496.1	-2.76	1.74353	-5.29042	0.00149479	0.0189936	-1.67929
TIMMDC1-DT	1.3502	1.3369	5.28956	0.0014961	0.0189949	-1.68027
AC008105.1	-1.44895	2.11006	-5.28734	0.00149946	0.0190159	-1.68277
AC006017.1	1.94521	4.37285	5.28645	0.00150081	0.0190159	-1.68378
AC090825.1	-2.34272	1.95095	-5.2851	0.00150287	0.0190159	-1.68532
LINCR-0001	2.74849	2.21333	5.28452	0.00150375	0.0190159	-1.68597
AC090971.5	2.41178	1.92414	5.28177	0.00150795	0.019029	-1.68909
AC009542.1	2.65826	1.80234	5.2816	0.00150822	0.019029	-1.68929
AL356753.1	1.0644	0.5322	5.28149	0.00150839	0.019029	-1.68941
AC009229.3	2.77732	1.82385	5.27527	0.00151793	0.019119	-1.69647
AL355310.1	1.15265	5.32684	5.25983	0.00154192	0.0193907	-1.71399
AC003101.2	2.43911	1.33105	5.25981	0.00154196	0.0193907	-1.71402
AL139349.1	1.67674	5.36474	5.25682	0.00154665	0.0194208	-1.71741
MORC2-AS1	-1.27411	1.03097	-5.25673	0.0015468	0.0194208	-1.71752
AC007686.4	3.44784	3.05565	5.24167	0.0015707	0.0197053	-1.73466
AP000866.1	-1.17908	0.613403	-5.24047	0.00157262	0.0197092	-1.73602
PDYN-AS1	2.24144	1.12072	5.23296	0.00158471	0.0198339	-1.74458
SEMA6A-AS1	-1.595	1.55183	-5.22661	0.00159502	0.0199472	-1.75183
AL445524.1	1.86664	4.98652	5.22533	0.0015971	0.0199575	-1.75328
AC007556.1	2.61674	4.31689	5.22295	0.00160099	0.0199785	-1.756
LINC02207	3.80109	4.42587	5.22276	0.0016013	0.0199785	-1.75622
AC006960.3	2.62624	2.23794	5.21941	0.0016068	0.0200313	-1.76005
AC004846.1	-1.14214	0.674125	-5.2177	0.00160961	0.0200505	-1.762
AC021594.2	4.00625	2.00313	5.2153	0.00161356	0.0200764	-1.76474
LINC01973	1.67896	2.09532	5.21374	0.00161613	0.0200844	-1.76652
AJ003147.3	1.46387	4.6893	5.20415	0.00163208	0.020261	-1.77749
AL121985.1	2.47172	1.48594	5.20133	0.00163681	0.0202936	-1.78072
CEP250-AS1	-1.5568	3.71765	-5.19959	0.00163972	0.0203067	-1.78271
AC002467.1	-1.81355	3.81105	-5.19917	0.00164043	0.0203067	-1.78319
CYB561D2	-3.49287	3.63577	-5.19499	0.00164747	0.020378	-1.78798
AC092329.4	-1.36784	2.55888	-5.19278	0.00165121	0.0204083	-1.79051
AC015920.1	-1.2598	0.93273	-5.18729	0.00166054	0.0205067	-1.7968
ABALON	-2.2862	3.58375	-5.18582	0.00166304	0.0205067	-1.79848
WASL-DT	-1.55353	1.63071	-5.18581	0.00166306	0.0205067	-1.79849
AC245052.7	3.15653	2.57512	5.16371	0.00170128	0.0209617	-1.82387
AC020978.9	2.01855	3.04599	5.15266	0.00172076	0.0211688	-1.83659
AC244093.4	3.03345	2.54469	5.14994	0.00172559	0.0212118	-1.83972
AC139768.1	-1.38982	1.9126	-5.14494	0.00173451	0.0213049	-1.84547
AC009021.2	-1.22325	1.03616	-5.14254	0.00173882	0.0213413	-1.84824
OBSCN-AS1	-1.79893	1.01214	-5.1408	0.00174193	0.021363	-1.85024
AC016542.2	2.98606	3.24122	5.13524	0.00175197	0.0214528	-1.85666
MAN1B1-DT	-1.33081	2.11492	-5.13254	0.00175687	0.0214946	-1.85977
AC073359.1	2.24954	1.64158	5.13187	0.0017581	0.0214946	-1.86056
AC012291.2	3.29058	2.76267	5.12901	0.0017633	0.0215416	-1.86386
AC092279.2	2.35499	3.29571	5.11412	0.00179067	0.0218308	-1.88105
AC012464.3	1.07177	0.835083	5.11389	0.00179111	0.0218308	-1.88132
AL356020.1	-2.27954	1.39875	-5.10874	0.0018007	0.0219308	-1.88729
AL031709.1	1.69217	3.44912	5.09304	0.00183027	0.0222569	-1.90547
AC007220.1	2.00543	1.31795	5.08608	0.00184357	0.0223842	-1.91355
AC116447.1	1.68504	1.13095	5.08314	0.00184921	0.0224354	-1.91696
AC091231.1	1.95138	2.92556	5.08161	0.00185215	0.0224539	-1.91873
LINC02803	3.63123	2.51031	5.07393	0.00186703	0.022617	-1.92766
LINC00540	-1.53787	0.919955	-5.07226	0.00187028	0.0226391	-1.9296
AC104695.3	2.30615	6.86133	5.06874	0.00187715	0.0227049	-1.93369
AC068491.2	2.97349	2.38913	5.06778	0.00187902	0.0227102	-1.93481
AL110115.1	1.47972	2.63509	5.06301	0.00188838	0.022806	-1.94036
LINC00886	-1.01259	0.886358	-5.06124	0.00189188	0.0228308	-1.94242
AC006480.2	-1.1358	1.88114	-5.05443	0.00190537	0.0229761	-1.95035
CR559946.2	-1.78872	0.894359	-5.04218	0.00192991	0.0232367	-1.96463
ODC1-DT	-1.54543	1.66823	-5.03945	0.00193544	0.0232856	-1.96782
AL132796.3	2.06883	1.35791	5.03378	0.00194696	0.0234064	-1.97444
AC064807.1	-1.63272	2.21575	-5.03004	0.0019546	0.0234804	-1.97881
PXN-AS1	-1.6451	1.33617	-5.02305	0.00196896	0.023635	-1.98698
AC017100.1	-1.17192	0.921222	-5.01648	0.00198258	0.0237805	-1.99467
NUP50-DT	-1.45107	4.6308	-5.01297	0.00198989	0.0238501	-1.99877
AC020656.2	-1.16663	1.06239	-5.01176	0.00199242	0.0238624	-2.00019
AC103876.1	-2.2078	1.1039	-5.00981	0.00199651	0.0238933	-2.00247
LINC01887	-1.80309	0.96839	-5.00783	0.00200066	0.0239249	-2.00479
Z82188.2	-1.63922	0.819608	-5.00405	0.00200862	0.0240019	-2.00922
PPP1R35-AS1	2.42912	1.62754	5.00012	0.00201695	0.0240705	-2.01384
AC120349.2	2.39136	4.14404	4.9999	0.0020174	0.0240705	-2.01408
AC022211.1	2.56709	3.65715	4.99738	0.00202276	0.0241164	-2.01705
LINC02809	-1.25423	3.01038	-4.99591	0.0020259	0.0241175	-2.01877
INSIG1-DT	-1.27134	3.15322	-4.99405	0.00202986	0.0241465	-2.02095
U73169.1	1.46928	6.86416	4.99144	0.00203544	0.0241947	-2.02401
AC005392.2	4.35936	6.13136	4.98979	0.00203898	0.0242187	-2.02595
AL731569.1	-1.52145	1.17038	-4.98597	0.0020472	0.024298	-2.03044
MAPKAPK5-AS1	-1.72058	3.7468	-4.98483	0.00204966	0.024309	-2.03178
AL031600.2	2.47864	2.20579	4.96652	0.00208964	0.0247461	-2.05332
AC007619.1	1.92897	1.30279	4.96359	0.00209612	0.0248043	-2.05677
AC008873.1	2.43961	2.53767	4.96064	0.00210265	0.024863	-2.06024
AC123768.1	2.08963	2.00372	4.9588	0.00210675	0.0248734	-2.06241
AP001107.8	-1.75117	1.14401	-4.95841	0.00210762	0.0248734	-2.06287
AP001469.2	-2.15358	1.07679	-4.95534	0.00211447	0.024919	-2.06649
AC084871.1	2.91384	4.46915	4.95493	0.00211538	0.024919	-2.06697
AC061992.2	1.90824	2.37462	4.94702	0.00213316	0.0250927	-2.0763
AC111170.2	1.44618	2.89238	4.94303	0.00214219	0.0251803	-2.08101
LINC01762	1.38067	1.8636	4.94122	0.0021463	0.0252099	-2.08315
AC005839.1	1.16377	3.68963	4.93892	0.00215153	0.0252339	-2.08586
AC005332.5	-1.04146	4.62111	-4.93644	0.0021572	0.0252767	-2.08879
AC234582.1	2.19588	1.81998	4.93582	0.00215861	0.0252767	-2.08952
AP001065.3	1.28065	0.825658	4.93523	0.00215997	0.0252767	-2.09022
AC024451.4	1.6005	3.44335	4.9326	0.002166	0.0253121	-2.09333
AL731568.1	2.83168	2.13781	4.93252	0.00216619	0.0253121	-2.09343
AC003973.2	-1.15794	0.694003	-4.9273	0.00217822	0.0254339	-2.0996
AC095055.1	1.42004	2.26999	4.92031	0.00219446	0.0255872	-2.10788
AC011476.3	-1.93235	2.63214	-4.92026	0.00219457	0.0255872	-2.10793
AC006213.2	-2.41484	1.53779	-4.91804	0.00219974	0.0256286	-2.11056
AC007038.1	-1.40995	2.64099	-4.91406	0.00220907	0.0256995	-2.11527
AC092329.1	-2.94764	2.95788	-4.91279	0.00221206	0.0257154	-2.11678
AL121894.2	-1.62266	1.74312	-4.90948	0.00221986	0.0257796	-2.1207
CT70	2.13984	1.4829	4.90811	0.0022231	0.0257796	-2.12233
AC084082.1	2.22326	1.11163	4.90791	0.00222357	0.0257796	-2.12257
AL359921.1	-1.51595	1.27142	-4.90769	0.00222409	0.0257796	-2.12283
LINC01619	1.03373	5.57098	4.90697	0.0022258	0.0257806	-2.12368
AC005519.1	-1.10363	3.96606	-4.90455	0.00223153	0.0258278	-2.12655
AC005540.1	-1.42751	2.09394	-4.90388	0.00223314	0.0258278	-2.12735
AC104564.3	-2.40835	1.84276	-4.90164	0.00223846	0.0258704	-2.13
AC092068.3	1.81973	1.49699	4.89095	0.00226411	0.0261073	-2.1427
AC111182.1	-1.4185	1.53954	-4.89036	0.00226554	0.0261073	-2.1434
AC091153.4	3.86582	2.74042	4.88378	0.0022815	0.0262721	-2.15122
ZNF516-DT	1.07602	1.02001	4.87854	0.00229431	0.0264003	-2.15746
BX640514.2	2.15548	3.62606	4.87772	0.0022963	0.0264041	-2.15842
AC008622.2	-2.81315	1.79675	-4.87615	0.00230017	0.0264294	-2.1603
PELATON	1.87972	8.00571	4.87498	0.00230304	0.0264433	-2.16169
AL513314.2	2.43462	3.71772	4.87255	0.00230903	0.0264928	-2.16459
ASH1L-IT1	2.70425	1.86047	4.87113	0.00231254	0.0265139	-2.16628
AC099494.3	1.56505	2.62684	4.86257	0.0023338	0.0267383	-2.17647
AL161729.1	-2.10404	1.18451	-4.86166	0.00233609	0.0267452	-2.17756
AC104964.3	1.64757	2.73322	4.85602	0.00235024	0.0268389	-2.18429
AC003043.2	-1.42062	0.71031	-4.85592	0.00235049	0.0268389	-2.18441
AC005392.3	2.2393	1.11965	4.8557	0.00235105	0.0268389	-2.18467
AL049539.1	1.66139	4.26047	4.84933	0.00236715	0.0269699	-2.19227
AC009318.3	2.39708	3.12375	4.84881	0.00236846	0.0269699	-2.19289
AC106795.2	-2.62937	1.81379	-4.84847	0.00236934	0.0269699	-2.1933
LINC01560	-1.93323	2.10353	-4.8346	0.00240486	0.027335	-2.20988
AC079610.1	-1.44186	0.919571	-4.83363	0.00240736	0.0273426	-2.21104
Z98749.1	1.88601	2.96669	4.83301	0.00240898	0.0273426	-2.21178
AL157395.1	1.56568	0.986182	4.82845	0.00242081	0.0274572	-2.21724
AC245884.11	2.41509	5.52161	4.82494	0.00242997	0.0275414	-2.22144
AL118508.2	1.8496	2.58336	4.8242	0.00243191	0.0275436	-2.22233
HLX-AS1	1.94645	1.36645	4.82084	0.00244072	0.0276237	-2.22636
RORA-AS1	-1.49405	0.747025	-4.82013	0.00244257	0.0276249	-2.2272
AC016026.1	-1.87455	2.16149	-4.81656	0.00245197	0.0277063	-2.23148
AL121601.1	1.86597	1.30854	4.81189	0.00246433	0.0278115	-2.23708
AC127459.1	-1.02772	1.0027	-4.80782	0.00247518	0.0279141	-2.24197
PRKAG2-AS1	-2.43216	2.52287	-4.79846	0.00250028	0.0281678	-2.2532
LINC01118	1.8196	1.02473	4.79811	0.00250124	0.0281678	-2.25363
STARD7-AS1	-1.34426	2.92034	-4.79241	0.00251666	0.0283154	-2.26047
FLJ20021	-1.23253	4.17099	-4.79174	0.00251848	0.0283154	-2.26128
AC012368.2	2.31545	3.17821	4.79129	0.00251971	0.0283154	-2.26182
AL163051.1	-1.08346	1.54159	-4.79024	0.00252259	0.0283277	-2.26309
AC066615.1	1.58479	0.792395	4.78753	0.00252997	0.0283704	-2.26634
AC109322.1	1.56478	3.0931	4.7863	0.00253333	0.028388	-2.26782
AC011468.2	-1.20038	4.95947	-4.78096	0.00254801	0.0285323	-2.27425
AC020663.2	1.86305	2.52241	4.77406	0.00256711	0.0287259	-2.28256
MCF2L-AS1	-2.56051	1.5124	-4.75242	0.00262804	0.02928	-2.30866
AC067852.1	-1.52153	3.91479	-4.75214	0.00262884	0.02928	-2.309
FLJ46284	1.11067	1.06128	4.75189	0.00262956	0.02928	-2.30931
LINC01644	-1.67594	0.837971	-4.75009	0.00263472	0.0293151	-2.31149
AC079414.3	-1.5631	1.36977	-4.7495	0.00263641	0.0293151	-2.3122
AC117395.1	2.11028	1.53686	4.74869	0.00263873	0.0293203	-2.31318
AC011899.2	3.39687	2.46177	4.74461	0.00265044	0.0294297	-2.31811
ZNF528-AS1	-1.61486	1.12788	-4.74276	0.00265578	0.0294684	-2.32035
AC017083.1	1.40945	3.15938	4.74034	0.00266278	0.0295254	-2.32328
AC004223.2	2.35882	3.74378	4.7395	0.00266522	0.0295317	-2.32429
MALINC1	-1.33552	0.986046	-4.73715	0.00267203	0.0295628	-2.32713
AC008543.1	-1.93013	1.1408	-4.73563	0.00267646	0.0295628	-2.32897
AL136376.1	2.01156	1.00578	4.73563	0.00267647	0.0295628	-2.32898
AJ271736.1	-1.19649	4.52923	-4.73508	0.00267806	0.0295628	-2.32964
BMS1P4	-2.163	2.16807	-4.73483	0.00267879	0.0295628	-2.32994
AC011491.2	2.39892	2.5848	4.73468	0.00267922	0.0295628	-2.33012
AL157871.5	1.07129	4.01097	4.72885	0.00269628	0.0297304	-2.33718
AC104118.1	1.4676	3.82537	4.7258	0.00270525	0.0298086	-2.34088
MGC16275	-1.35244	1.7852	-4.72305	0.00271337	0.0298772	-2.34421
LINC00659	1.92792	1.93266	4.72081	0.00271999	0.0299293	-2.34692
AP001033.1	-2.48443	1.24222	-4.7197	0.00272329	0.0299449	-2.34827
AL121832.3	1.58265	3.21661	4.71694	0.00273149	0.0300142	-2.35162
MIR155HG	-2.28164	1.64729	-4.70871	0.00275616	0.0302433	-2.36161
AL034347.1	1.88334	1.25063	4.70657	0.0027626	0.030293	-2.36421
NCK1-DT	-1.26774	2.71126	-4.70479	0.00276799	0.0303311	-2.36638
HS1BP3-IT1	1.90646	1.36817	4.70403	0.00277028	0.0303352	-2.36729
AC068580.1	1.77815	5.08788	4.69746	0.00279024	0.0305309	-2.37528
OTUD6B-AS1	-1.50358	3.52269	-4.69688	0.00279201	0.0305309	-2.37598
ADIRF-AS1	-1.85963	1.69339	-4.68439	0.00283045	0.0309169	-2.39119
BEAN1-AS1	2.87127	3.23757	4.68414	0.00283121	0.0309169	-2.39149
AC005776.2	1.25014	1.48498	4.67856	0.00284859	0.031064	-2.39829
AC068580.3	1.54329	0.919493	4.67784	0.00285082	0.0310669	-2.39916
MYLK-AS1	-1.69326	1.23078	-4.67511	0.00285937	0.0311387	-2.40249
AC004951.1	1.63233	3.87685	4.67271	0.0028669	0.0311992	-2.40542
AC134772.1	1.24747	2.47361	4.67073	0.00287314	0.0312456	-2.40783
AC243829.1	-2.80142	5.18504	-4.66105	0.00290386	0.0315148	-2.41965
AC091180.2	-1.5067	2.71154	-4.65659	0.00291812	0.0316479	-2.4251
AC079921.2	1.99572	3.53579	4.65349	0.00292809	0.0317344	-2.42889
AC016876.2	-1.18305	8.70583	-4.65029	0.00293842	0.0318245	-2.4328
AC012366.1	1.92432	1.33972	4.6479	0.00294614	0.0318864	-2.43572
IRAG1-AS1	1.86344	2.94987	4.64609	0.00295202	0.0319282	-2.43794
AC079174.1	1.99376	4.98092	4.64037	0.00297068	0.032075	-2.44494
AC068338.2	-1.92485	2.91941	-4.63945	0.0029737	0.032075	-2.44607
AL139317.3	-1.31991	2.72197	-4.63617	0.00298447	0.0321528	-2.45008
AC007036.2	1.42716	2.99624	4.63555	0.0029865	0.0321528	-2.45084
AC087672.1	2.005	1.711	4.6354	0.00298699	0.0321528	-2.45102
AC105415.1	-1.81164	1.83334	-4.63315	0.0029944	0.0322106	-2.45378
AC011676.1	2.33431	4.51262	4.62439	0.00302351	0.0325017	-2.46453
AC084824.3	-1.53046	1.64134	-4.60634	0.00308442	0.0330667	-2.48668
AC093788.1	-1.15109	1.09248	-4.6052	0.00308832	0.0330862	-2.48809
AC091057.1	-1.40944	1.93022	-4.60014	0.00310567	0.0332476	-2.49431
AC018445.3	1.67735	2.14946	4.59958	0.00310759	0.0332476	-2.495
AL135838.1	1.91832	1.37214	4.59364	0.0031281	0.0334445	-2.5023
TAF1A-AS1	-1.08372	0.81016	-4.59278	0.00313109	0.0334518	-2.50336
AC073655.2	-1.62643	1.12844	-4.59175	0.00313465	0.0334518	-2.50463
AC074050.4	-2.18839	2.23989	-4.59162	0.00313512	0.0334518	-2.50479
AC084125.4	-2.73942	1.91754	-4.58988	0.00314117	0.0334939	-2.50694
AL022345.4	-2.23404	1.46104	-4.58603	0.00315462	0.0336146	-2.51168
SLC16A1-AS1	-1.22679	1.21282	-4.58353	0.00316337	0.0336639	-2.51476
AC016831.1	3.14131	4.70836	4.5835	0.00316349	0.0336639	-2.5148
AL512652.1	-1.61252	1.31602	-4.58238	0.00316742	0.033683	-2.51618
LINC00398	3.1997	2.75785	4.58137	0.00317096	0.0336981	-2.51742
AC024475.2	1.14359	0.644794	4.57749	0.00318465	0.0338209	-2.5222
LINC01948	2.67099	2.87296	4.5599	0.00324757	0.034466	-2.54393
AP002360.1	-2.00925	3.47624	-4.55787	0.0032549	0.0345207	-2.54643
AC026790.1	1.21705	0.723053	4.55722	0.00325725	0.0345225	-2.54723
PRR7-AS1	1.10386	0.771557	4.55205	0.0032761	0.0346991	-2.55363
AC009159.2	-1.29148	0.645738	-4.54809	0.00329059	0.0348293	-2.55853
AP006287.2	2.14114	1.49435	4.54387	0.00330612	0.0349702	-2.56376
AC007663.3	-1.67645	2.40261	-4.54039	0.00331896	0.0350827	-2.56806
AL669970.3	1.85664	0.928321	4.52884	0.00336205	0.0354671	-2.58238
Z95115.1	-1.413	1.14049	-4.521	0.00339166	0.0357557	-2.59211
AC009812.1	-1.98362	1.90006	-4.51943	0.00339763	0.0357949	-2.59406
AL139288.1	-1.67919	3.49932	-4.51165	0.00342736	0.0360601	-2.60373
AL512288.1	1.0325	1.06132	4.49937	0.00347488	0.0364891	-2.61901
AC023818.1	1.58426	2.7243	4.49267	0.00350109	0.0367139	-2.62734
AC008429.3	2.31405	2.41202	4.48387	0.00353589	0.0370298	-2.63831
AL359762.1	1.12255	5.69343	4.48227	0.00354227	0.0370484	-2.64031
AC090409.1	-2.89034	2.39431	-4.4817	0.00354453	0.0370484	-2.64102
AC134312.2	2.32502	1.16251	4.47269	0.00358065	0.0373751	-2.65226
AL359397.2	-2.15993	2.39898	-4.46984	0.00359215	0.0374705	-2.65582
AC092171.3	1.35228	1.96323	4.46854	0.00359742	0.0375008	-2.65745
AC084824.5	-2.06579	1.44904	-4.46128	0.00362699	0.0377593	-2.66653
AC016586.1	1.35732	4.62393	4.45759	0.00364211	0.037867	-2.67114
AF111169.1	-2.1023	3.33447	-4.45066	0.00367069	0.038114	-2.6798
AC053513.2	1.84253	3.42408	4.44562	0.00369167	0.0383068	-2.68612
AC005083.1	-1.20249	0.601247	-4.44433	0.00369706	0.0383376	-2.68774
TIPARP-AS1	-1.68156	1.24605	-4.4432	0.00370177	0.0383614	-2.68915
LINC01348	1.37896	0.782019	4.44013	0.00371464	0.0384445	-2.693
AL163541.1	2.36743	5.34752	4.4353	0.00373499	0.0385795	-2.69905
AC018445.4	1.35222	1.63213	4.43256	0.00374658	0.0386739	-2.70249
LINC01750	-1.24192	0.620962	-4.43197	0.0037491	0.0386748	-2.70323
AL512306.2	1.72323	3.98678	4.42296	0.00378753	0.0390204	-2.71454
AC026691.1	1.16187	1.82974	4.42115	0.0037953	0.0390751	-2.71681
AC016027.3	1.38743	0.693717	4.41878	0.00380551	0.0391548	-2.71979
LINC01011	-1.66373	2.41376	-4.41502	0.00382181	0.0392969	-2.72452
ZNF22-AS1	-1.49268	0.780744	-4.41306	0.00383032	0.0393334	-2.72699
RASA2-IT1	2.24749	2.5325	4.41197	0.00383504	0.0393563	-2.72835
LINC02610	-1.85096	1.16646	-4.40866	0.00384949	0.0394791	-2.73252
AC254633.1	-2.11288	1.29562	-4.40572	0.00386236	0.0395599	-2.73622
Z97192.3	1.97082	3.25471	4.39893	0.00389226	0.0398146	-2.74476
LINC02723	-2.72254	2.20363	-4.39808	0.00389603	0.0398275	-2.74584
AC145423.1	1.92169	1.52118	4.39737	0.00389917	0.0398339	-2.74673
AC040904.1	2.02137	3.44022	4.3922	0.00392219	0.0400432	-2.75325
AC093462.1	1.12924	1.28473	4.38269	0.00396486	0.0404528	-2.76524
AP001636.3	-1.3535	1.08875	-4.3788	0.00398248	0.0406064	-2.77015
AC012368.1	-1.30342	6.82505	-4.37591	0.0039956	0.040714	-2.77379
AL606834.2	1.93107	5.06672	4.37067	0.00401955	0.0409272	-2.78041
LINC01088	-1.51182	0.755912	-4.37021	0.00402169	0.0409272	-2.781
AC004847.1	1.61331	4.27888	4.36767	0.00403337	0.0410198	-2.78421
LINC01771	-1.91535	0.957676	-4.36524	0.00404458	0.0411074	-2.78728
AC008735.4	1.32252	0.81601	4.3636	0.00405212	0.0411576	-2.78934
AC100821.2	1.94406	2.11899	4.36106	0.00406392	0.041251	-2.79256
AL031963.3	-1.4372	3.23168	-4.35799	0.00407821	0.0413696	-2.79645
LINC01127	2.13062	5.19586	4.34965	0.00411729	0.0417392	-2.80701
AC111170.3	2.22423	2.61901	4.34837	0.00412331	0.0417736	-2.80863
AC020907.3	1.99471	1.50108	4.33842	0.00417056	0.0422252	-2.82124
AC131391.1	1.96433	2.11901	4.33685	0.00417806	0.0422741	-2.82323
AC020636.1	4.43362	2.79715	4.33601	0.00418211	0.0422881	-2.8243
AC011462.3	2.53446	1.82428	4.33152	0.00420366	0.042479	-2.82999
AL138916.2	1.24684	1.20517	4.33084	0.00420695	0.0424851	-2.83086
AC034102.7	-2.07957	1.387	-4.32699	0.00422555	0.0426458	-2.83574
AC022431.1	1.90453	2.07303	4.32465	0.00423693	0.0427334	-2.83872
AL022069.1	-1.12216	0.842232	-4.32112	0.00425416	0.0428681	-2.84321
AC073957.3	1.70679	1.89315	4.3208	0.0042557	0.0428681	-2.84361
AC004825.2	2.12547	2.7638	4.31878	0.00426559	0.0429405	-2.84618
ZNF561-AS1	-1.25792	1.35193	-4.31689	0.00427487	0.0430065	-2.84858
SREBF2-AS1	1.39183	1.96768	4.31485	0.00428487	0.0430798	-2.85117
AC010503.4	-1.8609	0.930448	-4.3105	0.00430636	0.0432684	-2.85671
TNK2-AS1	-1.95344	4.18082	-4.30969	0.00431037	0.0432813	-2.85774
LINC02018	1.56568	1.46763	4.30756	0.00432094	0.04336	-2.86045
RPS6KA2-IT1	1.80465	0.902326	4.30399	0.00433872	0.0435108	-2.86499
STIM2-AS1	-3.33936	2.07993	-4.30277	0.00434485	0.0435447	-2.86655
SRP14-AS1	-1.34464	2.01982	-4.30214	0.00434798	0.0435485	-2.86735
AL162274.3	1.94678	1.73321	4.30119	0.00435277	0.0435689	-2.86856
AL133163.2	1.68037	1.18234	4.29855	0.00436599	0.0436461	-2.87192
AC005529.1	2.42241	2.15525	4.29488	0.00438447	0.0437756	-2.87659
AC051619.5	-2.06663	2.29969	-4.28892	0.0044147	0.0440497	-2.88419
AGAP2-AS1	1.06057	1.64109	4.28649	0.00442711	0.0441457	-2.8873
AC107223.1	-1.36366	0.869175	-4.28413	0.00443918	0.0442383	-2.89031
AC093752.1	1.44682	5.01508	4.28239	0.0044481	0.0442993	-2.89253
LINC01160	1.96921	2.14847	4.27934	0.00446377	0.0444274	-2.89642
AC000068.1	-1.55082	1.08009	-4.27635	0.00447922	0.0445532	-2.90024
HDAC4-AS1	-1.21653	3.2141	-4.27039	0.00451016	0.0448328	-2.90786
AC007666.1	1.40143	1.02538	4.26744	0.00452557	0.0449485	-2.91163
LINC01816	1.69112	2.56335	4.26708	0.00452747	0.0449485	-2.91209
AL807752.5	1.30997	2.56489	4.26586	0.00453385	0.0449554	-2.91365
FO704657.1	1.4435	2.76276	4.265	0.00453838	0.0449723	-2.91475
SNHG7	-1.51601	4.72741	-4.26439	0.00454156	0.0449757	-2.91553
TMEM252-DT	1.41908	1.51708	4.2628	0.00454994	0.0450305	-2.91757
AL441992.1	-1.07556	3.76171	-4.26014	0.00456397	0.0451411	-2.92097
AC244502.1	-1.74698	1.63055	-4.25686	0.00458132	0.0452844	-2.92516
AC011479.3	1.35608	1.20588	4.25537	0.00458923	0.0453344	-2.92707
AC125437.1	1.43874	2.76535	4.24526	0.00464331	0.04584	-2.94002
LINC00649	-2.85527	2.41769	-4.24237	0.00465892	0.0459655	-2.94373
AC018761.3	1.85762	3.53919	4.23881	0.00467817	0.0461267	-2.94829
AC126474.2	1.30969	4.88267	4.23678	0.00468921	0.0462068	-2.9509
AL390195.1	-1.57184	4.04281	-4.23464	0.00470087	0.0462734	-2.95364
LINC-PINT	1.39543	5.77304	4.23447	0.00470181	0.0462734	-2.95386
AC010894.1	1.12856	0.790537	4.22879	0.00473295	0.046551	-2.96116
AL138694.1	1.38869	1.36778	4.22758	0.0047396	0.0465866	-2.96271
HEIH	-1.08434	7.02692	-4.22706	0.00474245	0.0465866	-2.96338
AL590491.2	-1.63569	2.19218	-4.22323	0.00476365	0.0467658	-2.9683
AC008026.3	2.36036	2.73459	4.21951	0.00478429	0.0469394	-2.97308
AP000894.4	-1.20812	1.81393	-4.21737	0.00479623	0.0470274	-2.97584
PSORS1C3	2.08959	1.71412	4.21345	0.00481816	0.0471841	-2.98088
AP000911.1	-1.35608	0.67804	-4.21258	0.00482303	0.0472025	-2.98199
AC002398.2	1.94087	1.36149	4.21045	0.004835	0.0472904	-2.98473
AL049840.6	2.75698	4.31046	4.2047	0.00486754	0.0475264	-2.99214
AC073534.2	2.01207	1.00604	4.20444	0.00486901	0.0475264	-2.99247
AC090181.1	2.43048	5.17322	4.2039	0.00487205	0.0475264	-2.99317
AC022960.2	1.65276	2.37191	4.20333	0.00487531	0.0475264	-2.9939
N4BP2L2-IT2	1.10984	5.45246	4.19947	0.00489731	0.0476839	-2.99888
AC105429.1	1.75995	1.46953	4.19888	0.00490068	0.0476839	-2.99964
AC231981.1	-1.75996	1.28466	-4.19859	0.00490231	0.0476839	-3
AP003108.4	1.49534	4.05854	4.19696	0.00491164	0.0477453	-3.0021
AC009948.2	1.87437	4.85545	4.19327	0.00493288	0.0479224	-3.00687
AC093424.1	1.92483	0.962416	4.18899	0.00495759	0.0481035	-3.01239
AC004816.2	2.15952	1.51184	4.18837	0.00496118	0.0481089	-3.01319
LINC00926	-2.98152	3.68217	-4.18629	0.00497325	0.0481965	-3.01587
AC016737.1	1.6212	2.8573	4.18311	0.00499177	0.0483463	-3.01998
AC112200.1	1.6959	0.847949	4.1752	0.00503816	0.0487063	-3.03019
AC026471.1	-1.17024	4.98592	-4.17425	0.00504375	0.0487088	-3.03142
LINC01700	2.20545	1.10273	4.17284	0.00505207	0.0487515	-3.03324
AC243773.2	2.59111	2.92311	4.17204	0.0050568	0.0487674	-3.03427
AC096733.2	-1.34933	1.34041	-4.17028	0.00506724	0.0488385	-3.03655
AC005034.3	-1.58019	2.21842	-4.16858	0.00507736	0.0489062	-3.03875
AL359697.1	1.98823	1.7364	4.16433	0.00510271	0.0491205	-3.04425
AC078962.1	3.44041	4.0552	4.15946	0.00513189	0.0493715	-3.05054
AL035530.1	-3.51695	8.07644	-4.15457	0.00516139	0.0496252	-3.05687
AL157832.1	-1.89897	0.949486	-4.153	0.00517095	0.0496869	-3.05891
C22orf34	1.17188	3.25051	4.15042	0.00518657	0.0498068	-3.06224
